# Supplementary material for: Early risk assessment in paediatric and adult household contacts of confirmed tuberculosis cases by novel diagnostic tests (ERASE-TB): protocol for a prospective, non-interventional, longitudinal, multicountry cohort study
Source: PubMed Central journal article supplement (PMC9301805; doi:10.1136/bmjopen-2022-060985), 2022-07-19

# BMJ Open

BMJ Open is committed to open peer review. As part of this commitment we make the peer review history of every article we publish publicly available.

When an article is published we post the peer reviewers' comments and the authors' responses online. We also post the versions of the paper that were used during peer review. These are the versions that the peer review comments apply to.

The versions of the paper that follow are the versions that were submitted during the peer review process. They are not the versions of record or the final published versions. They should not be cited or distributed as the published version of this manuscript.

BMJ Open is an open access journal and the full, final, typeset and author-corrected version of record of the manuscript is available on our site with no access controls, subscription charges or pay-per-view fees (<http://bmjopen.bmj.com>).

If you have any questions on BMJ Open's open peer review process please email [info.bmjopen@bmj.com](mailto:info.bmjopen@bmj.com)

# BMJ Open

## Early risk assessment in pediatric and adult household contacts of confirmed tuberculosis cases by novel diagnostic tests (ERASE-TB): protocol for a prospective, non-interventional, longitudinal, multi-country cohort study

|                               |                                                                                                                                                                                                                                                                                                                                                                                                                                                                                                                                                                                                                                                                                                                                                                                                                                                                                                                                                                                                                                                                                                                                                                                                                                                                                                                                                                                                                                                                                                                                                                                                                                                                                                                                                                                                                            |
|-------------------------------|----------------------------------------------------------------------------------------------------------------------------------------------------------------------------------------------------------------------------------------------------------------------------------------------------------------------------------------------------------------------------------------------------------------------------------------------------------------------------------------------------------------------------------------------------------------------------------------------------------------------------------------------------------------------------------------------------------------------------------------------------------------------------------------------------------------------------------------------------------------------------------------------------------------------------------------------------------------------------------------------------------------------------------------------------------------------------------------------------------------------------------------------------------------------------------------------------------------------------------------------------------------------------------------------------------------------------------------------------------------------------------------------------------------------------------------------------------------------------------------------------------------------------------------------------------------------------------------------------------------------------------------------------------------------------------------------------------------------------------------------------------------------------------------------------------------------------|
| Journal:                      | <i>BMJ Open</i>                                                                                                                                                                                                                                                                                                                                                                                                                                                                                                                                                                                                                                                                                                                                                                                                                                                                                                                                                                                                                                                                                                                                                                                                                                                                                                                                                                                                                                                                                                                                                                                                                                                                                                                                                                                                            |
| Manuscript ID                 | bmjopen-2022-060985                                                                                                                                                                                                                                                                                                                                                                                                                                                                                                                                                                                                                                                                                                                                                                                                                                                                                                                                                                                                                                                                                                                                                                                                                                                                                                                                                                                                                                                                                                                                                                                                                                                                                                                                                                                                        |
| Article Type:                 | Protocol                                                                                                                                                                                                                                                                                                                                                                                                                                                                                                                                                                                                                                                                                                                                                                                                                                                                                                                                                                                                                                                                                                                                                                                                                                                                                                                                                                                                                                                                                                                                                                                                                                                                                                                                                                                                                   |
| Date Submitted by the Author: | 11-Jan-2022                                                                                                                                                                                                                                                                                                                                                                                                                                                                                                                                                                                                                                                                                                                                                                                                                                                                                                                                                                                                                                                                                                                                                                                                                                                                                                                                                                                                                                                                                                                                                                                                                                                                                                                                                                                                                |
| Complete List of Authors:     | <p>Marambire, Edson; Biomedical Research and Training Institute, Banze, Denise; Instituto Nacional de Saúde Mfinanga, Alfred; Mbeya Medical Research Centre Mutsvangwa, Junior; Biomedical Research and Training Institute Mbunda, Theodora ; NIMR-Mbeya Medical Research Programme Ntinginya, Nyanda; 6. National Institute of Medical Research-Mbeya Medical Research Centre</p> <p>Celso, Khosa; Instituto Nacional de Saúde Kallenius, Gunilla; Karolinska Institutet Calderwood, Claire J.; London School of Hygiene and Tropical Medicine Faculty of Infectious and Tropical Diseases Geldmacher, Christof; University Hospital, Division of Infectious Diseases and Tropical Medicine, LMU Munich ; German Center for Infection Research, Partner site Munich</p> <p>Held, Kathrin; University Hospital, Division of Infectious and Tropical Medicine, LMU Munich ; German Center for Infection Research, Partner site Munich</p> <p>Appalarowthu, Tejaswi; University Hospital, Division of Infectious Diseases and Tropical Medicine, LMU Munich; German Center for Infection Research, Partner site Munich</p> <p>Rieß, Friedrich; University Hospital, Division of Infectious Diseases and Tropical Medicine, LMU Munich; German Center for Infection Research, Partner site Munich</p> <p>Panzner, Ursula; University Hospital, Division of Infectious Diseases and Tropical Medicine, LMU Munich; German Center for Infection Research, Partner site Munich</p> <p>Heinrich, Norbert; University Hospital, Division of Infectious Diseases and Tropical Medicine, LMU Munich; German Center for Infection Research, Partner site Munich</p> <p>Kranzer, Katharina; London School of Hygiene and Tropical Medicine Faculty of Infectious and Tropical Diseases; Biomedical Research and Training Institute</p> |
| Keywords:                     | Tuberculosis < INFECTIOUS DISEASES, Diagnostic microbiology < INFECTIOUS DISEASES, RESPIRATORY MEDICINE (see Thoracic Medicine)                                                                                                                                                                                                                                                                                                                                                                                                                                                                                                                                                                                                                                                                                                                                                                                                                                                                                                                                                                                                                                                                                                                                                                                                                                                                                                                                                                                                                                                                                                                                                                                                                                                                                            |
|                               |                                                                                                                                                                                                                                                                                                                                                                                                                                                                                                                                                                                                                                                                                                                                                                                                                                                                                                                                                                                                                                                                                                                                                                                                                                                                                                                                                                                                                                                                                                                                                                                                                                                                                                                                                                                                                            |

1  
2  
3  
4  
5  
6  
7  
8  
9  
10  
11  
12  
13  
14  
15  
16  
17  
18  
19  
20  
21  
22  
23  
24  
25  
26  
27  
28  
29  
30  
31  
32  
33  
34  
35  
36  
37  
38  
39  
40  
41  
42  
43  
44  
45  
46  
47  
48  
49  
50  
51  
52  
53  
54  
55  
56  
57  
58  
59  
60

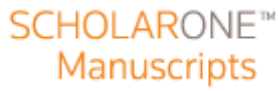

1  
2  
3 1 **Early risk assessment in pediatric and adult household contacts of confirmed**  
4  
5 2 **tuberculosis cases by novel diagnostic tests (ERASE-TB): protocol for a**  
6  
7 3 **prospective, non-interventional, longitudinal, multi-country cohort study**  
8  
9 4

10 5 Edson Tawanda Marambire<sup>1\*</sup>, Denise Banze<sup>2§</sup>, Alfred Mfinanga<sup>3§</sup>, Junior Mutsvangwa<sup>1</sup>, Theodora  
11 6 Mbunda<sup>3</sup>, Elias N. Nyanda<sup>3</sup>, Khosa Celso<sup>2</sup>, Gunilla Kallenius<sup>4</sup>, Claire J. Calderwood<sup>5</sup>, Christof  
12 7 Geldmacher<sup>6,7</sup>, Kathrin Held<sup>6,7</sup>, Tejaswi Appalarowthu<sup>6,7</sup>, Friedrich Rieß<sup>6,7</sup>, Ursula Panzner<sup>6,7</sup>, Norbert  
13 8 Heinrich<sup>6,7#</sup>, Katharina Kranzer<sup>1,5,6#</sup>, on behalf of the ERASE-TB Consortium  
14  
15  
16  
17  
18  
19  
20  
21  
22

23 10 <sup>1</sup>Biomedical Research and Training Institute, Harare, Zimbabwe

24 11 <sup>2</sup>Instituto Nacional de Saúde, Marracuene, Mozambique

25 12 <sup>3</sup>National Institute for Medical Research - Mbeya Medical Research Centre, Mbeya, Tanzania

26 13 <sup>4</sup>Karolinska Institute, Stockholm, Sweden

27 14 <sup>5</sup>Faculty of Infectious and Tropical Diseases and Tuberculosis Centre, London School of Hygiene &  
28 15 Tropical Medicine, London, UK

29 16 <sup>6</sup>Division of Infectious Diseases and Tropical Medicine, University Hospital, LMU Munich, Munich,  
30 17 Germany

31 18 <sup>7</sup> German Center for Infection Research (DZIF), Partner site Munich, Munich, Germany  
32  
33  
34  
35  
36  
37  
38  
39  
40  
41  
42  
43  
44  
45  
46  
47  
48  
49  
50  
51  
52  
53  
54  
55

20 \*Corresponding author: Edson Tawanda Marambire; 8 Rose Avenue, Belgravia, Harare, Zimbabwe; e-  
21 mail: edsonmarambire@gmail.com; phone: +263772286311  
22

23 § Contributed equally

24 # Contributed equally  
25

26 Word count: 3,254  
27

28 **Keywords:** *Mycobacterium tuberculosis*, diagnostics, cohort study, household contacts, WHO  
29 END TB strategy, ERASE-TB  
30  
31  
32  
33  
34  
35  
36  
37  
38  
39  
40  
41  
42  
43  
44  
45  
46  
47  
48  
49  
50  
51  
52  
53  
54  
55  
56  
57  
58  
59  
60

## 30 **ABSTRACT**

### 31 **Introduction**

32 The World Health Organization (WHO) End-TB Strategy calls for the development of novel  
33 diagnostics to detect tuberculosis earlier and more accurately. Better diagnostics, together with  
34 tools to predict disease progression are critical for achieving WHO END-TB targets. The Early  
35 Risk Assessment in TB contactS by new diagnostic tEsts (ERASE-TB) study aims to evaluate  
36 novel diagnostics and testing algorithms for early tuberculosis diagnosis and accurate  
37 prediction of disease progression among household contacts exposed to confirmed index  
38 cases in Mozambique, Tanzania and Zimbabwe.

### 40 **Methods and analysis**

41 A total of 2,100 household contacts (HHCs) (aged  $\geq 10$  years) of adults with microbiologically-  
42 confirmed pulmonary tuberculosis will be recruited and followed up at 6-month intervals for 18  
43 to 24 months. At each time-point a WHO symptom screen and digital chest-radiograph (dCXR)  
44 will be performed, and blood and urine samples collected. Individuals screening positive (WHO  
45 symptom screen or dCXR) will be requested to provide sputum for Xpert MTB/Rif Ultra. At  
46 baseline, HHCs will also be screened for HIV, diabetes (HbA1c), chronic lung disease  
47 (spirometry), hypertension and anaemia. Study outcomes will be co-prevalent tuberculosis  
48 (diagnosed at enrollment), incident tuberculosis (diagnosed during follow-up) or no  
49 tuberculosis at completion of follow up. Novel diagnostics will be validated using fresh and  
50 biobanked samples with a nested case control design. Cases are defined as HHCs diagnosed  
51 with tuberculosis (for early diagnosis) or with incident tuberculosis (for prediction of  
52 progression) and will be matched by age, sex and country to HHCs who remain healthy  
53 (controls). Statistical analyses will include assessment of diagnostic accuracy by constructing  
54 receiver operating curves and calculation of sensitivity and specificity.

### 56 **Ethics and dissemination**

1  
2  
3 57 ERASE-TB has been approved by regulatory and ethical committees in each African country  
4  
5 58 and by each partner organisation. Consent, with additional assent for participants <18 years,  
6  
7 59 is voluntary. Attestation by impartial witnesses is sought in case of illiteracy. Confidentiality of  
8  
9 60 participants is being maintained throughout. Study findings will be presented at scientific  
10  
11 61 conferences and published in peer-reviewed international journals.  
12

13  
14 62

15  
16 63 **Trial registration number**

17  
18 64 NCT04781257  
19  
20  
21  
22  
23  
24  
25  
26  
27  
28  
29  
30  
31  
32  
33  
34  
35  
36  
37  
38  
39  
40  
41  
42  
43  
44  
45  
46  
47  
48  
49  
50  
51  
52  
53  
54  
55  
56  
57  
58  
59  
60

1  
2  
3 65 **Strengths and limitations of this study**

4  
5 66 **Strengths**

- 6  
7 67 • Recruitment of highly infectious index cases aimed at maximising the number of  
8 tuberculosis (TB) diagnoses in the household contact (HHCs) cohort.  
9  
10 68  
11 69 • Sequencing of *Mycobacterium tuberculosis* isolates from both index cases and HHCs  
12 allows confirmation of household transmission and thus determination of timing of the  
13 transmission event; resulting in more precise estimates of new test sensitivity  
14 compared to population-based cohorts with unknown timing of infection.  
15  
16 71  
17  
18 72  
19  
20 73 • Large sample size across three southern African countries with high HIV prevalence;  
21 including adolescents will ensure study findings are generalisable to the clinically  
22 relevant population at high risk of TB compared to studies focused on adults only.  
23  
24 75  
25  
26 76

27  
28 77 **Limitations**

- 29  
30 78 • Despite the large cohort of HHCs, the number of diagnosed TB cases will be small,  
31 limiting the power of the study and sub-group analyses such as by age and HIV status.  
32  
33 79  
34  
35 80 • Geographically limited to sub-Saharan Africa, therefore results may not be  
36 generalisable to other populations, including those with lower HIV prevalence such as  
37 in South-East Asia or the Americas.  
38  
39 82  
40  
41  
42  
43  
44  
45  
46  
47  
48  
49  
50  
51  
52  
53  
54  
55  
56  
57  
58  
59  
60

## 83 INTRODUCTION

84 Tuberculosis (TB) remains a leading global public health problem, with an estimated 10 million  
85 new cases and 1.5 million deaths globally in 2020 [1]. In 2014, the World Health Assembly  
86 approved the World Health Organization (WHO) End-TB Strategy, aiming for a 90% reduction  
87 in TB incidence and 95% reduction in TB deaths by 2035 [2]. However, in 2019, three million  
88 TB cases ('the missing millions') remained undiagnosed and untreated globally, resulting in  
89 potentially avoidable morbidity, mortality and onward transmission. The Covid-19 pandemic  
90 has resulted in a large decrease in the number of people newly diagnosed with TB and  
91 reported. This has increased the diagnostic gap by a further 1.3 million, resulting in an  
92 estimated 4.2 million undiagnosed TB cases in 2020 [3]. Also, for the first time in a decade TB  
93 deaths have risen, from an estimated 1.4 million in 2019 to 1.5 million in 2020, as a result of  
94 reduced access to and provision of essential TB services including diagnostics during the  
95 Covid-19 pandemic.

96  
97 Without an efficacious and safe vaccine, early detection and containment are the main tools  
98 to interrupt transmission and successfully control TB. Similar to SARS-CoV2, asymptomatic  
99 spreading of *M.tuberculosis* and subclinical but infectious disease states are a major concern  
100 in the control of airborne infectious diseases [4]. Early and accurate identification of persons  
101 with TB, combined with identification of those at risk of progression to TB and provision of  
102 targeted preventive treatment are critical to reducing TB-associated morbidity and mortality,  
103 and preventing onward transmission.

104  
105 Currently available diagnostics such as sputum microscopy, mycobacterial culture and nucleic  
106 acid amplification tests are based on direct pathogen detection, thus requiring a high  
107 mycobacterial load; they therefore predominately target advanced TB when onward  
108 transmission and significant lung damage has occurred [5,6]. Further, for many patients with  
109 minimal or no symptoms, expectoration of high-quality sputum specimens remains



1  
2  
3 110 challenging, limiting the accuracy of sputum-based tests. The same holds true for young  
4  
5 111 children and people living with HIV.  
6

7 112  
8  
9 113 The **Early Risk Assessment in TB Contacts by new diagnostic tests** (ERASE-TB) study aims  
10  
11 114 to fill this diagnostic gap by evaluating new sputum and non-sputum-based TB diagnostics for  
12  
13 115 early TB detection (before onward transmission occurs), as well as tools for more accurate  
14  
15 116 prediction of TB progression to allow for targeted preventive therapy.  
16  
17

18 117

## 19 20 118 **METHODS AND ANALYSES**

### 21 22 119 **Study objectives**

23  
24 120 ERASE-TB's primary objectives are (I) to determine the sensitivity and specificity of novel  
25  
26 121 diagnostics to detect TB, in particular asymptomatic or minimally symptomatic TB; (II) to  
27  
28 122 evaluate novel diagnostics for detection of likely TB progression; and (III) to enhance the  
29  
30 123 performance of novel diagnostics by simulating testing algorithms coupled with individual risk  
31  
32 124 estimates from a mathematical model. The secondary objectives are (I) to determine the TB  
33  
34 125 prevalence among household contacts (HHCs) of infectious TB index cases (ICs) at baseline  
35  
36 126 and during a 18-24 months follow-up; (II) to establish a biorepository of cryopreserved  
37  
38 127 specimens from HHCs for future development and validation of diagnostic tests; and (III) to  
39  
40 128 assess the association of selected chronic disease conditions and TB among HHCs.  
41  
42

43 129

### 44 45 130 **Study endpoints**

46  
47 131 The study's primary endpoints are the presence or development of TB among HHCs with the  
48  
49 132 following possible scenarios of (I) prevalent symptomatic TB at baseline, (II) incident TB during  
50  
51 133 follow-up, and (III) remained healthy until study completion. An endpoint review committee will  
52  
53 134 review the data and case classification before finalization.  
54

55  
56 135

57  
58 136 Through the sequencing of *Mycobacterium tuberculosis* (*Mtb*) isolates, cases of co-prevalent  
59  
60 137 or incident TB will be classified either as secondary, infected by the source case – the timepoint

1  
2  
3 138 of infection will be known; or as infected by another, unknown source of infection, with an  
4  
5 139 unknown timepoint of infection.  
6

7 140

### 9 141 **Recruitment sites**

11 142 Recruitment of ICs and HHCs at selected primary healthcare facilities and communities has  
12  
13 143 commenced in Harare, Zimbabwe in March 2021, Maputo, Mozambique in August 2021, and  
14  
15 144 Mbeya, Tanzania in September 2021. Partners of the ERASE-TB consortium are illustrated in  
16  
17 145 Figure 1. All three countries have a high TB incidence ranging from 100 to 499/100,000  
18  
19 146 population [1] and HIV prevalence among adults aged 15 years and older of 5% to 20% [7].  
20  
21 147 The African research institutions have established collaborations with their respective National  
22  
23 148 Tuberculosis Programs ensuring referral and appropriate follow-up of TB patients. Figure 2  
24  
25 149 illustrates the geographic location of research institutions, healthcare facilities where  
26  
27 150 recruitment is taking place, demographic characteristics of study populations, and estimates  
28  
29 151 on TB incidence and HIV prevalence [8–15].  
30  
31

32 152

### 34 153 **Study design**

36 154 ERASE-TB is a non-interventional, longitudinal, prospective cohort study among HHCs aged  
37  
38 155  $\geq 10$  years exposed to highly infectious pulmonary TB ICs aged  $\geq 18$  years. Eligibility criteria  
39  
40 156 are detailed in Figure 3 and the study design is shown in Figure 4. TB ICs are eligible if the  
41  
42 157 bacterial load in their sputum is at least at the “medium” level according to Xpert MTB/RIF or  
43  
44 158 Xpert MTB/RIF Ultra, and they have received less than seven daily doses of anti-TB treatment  
45  
46 159 before enrollment. This maximises the likelihood of culturing and storing *Mtb* isolates. The total  
47  
48 160 study duration will be 36 months. This includes 12-months enrollment of ICs and HHCs, and  
49  
50 161 18- to 24-months follow-ups of HHCs. Follow-up ends when a HHCs withdraws from the study,  
51  
52 162 is lost to follow-up, dies, or is diagnosed with TB and referred for treatment. Scheduled or  
53  
54 163 unscheduled unwell visits can be conducted physically and/or telephonically in case of  
55  
56 164 abnormal finding e.g. by abnormal dCXR, or when a participant feels unwell inbetween  
57  
58 165 scheduled follow-up visits.  
59  
60

166

**Procedures*****TB index cases***

Following informed consent obtained, a questionnaire is administered to collect socio-demographic information, TB risk factors, and the medical history of TB, HIV and other diseases. Two spontaneous sputum samples are obtained, of which one is for mycobacterial culturing and one for storage for performing retrospectively Molecular Bacterial Load Assay (MBLA) to quantify viable *Mtb* by 16S rRNA [6]; an alternative means to quantify expectorated bacterial load for an estimate of infectiousness. Both liquid and solid mycobacterial cultures are performed on decontaminated sputum samples, with all *Mtb* isolates stored at -80 degrees for future DNA extraction and whole genome sequencing. A questionnaire on symptom duration and TB risk factors is also administered.

178

***Household key informant***

At baseline, a household key informant (either the TB index case or one of the household contacts) is identified and asked to answer questions of a household questionnaire that collects socio-economic elements like structure of the house or flat, income and household assets, and covariates possibly associated with risk of TB infection, e.g., windows/air exchange, presence of comorbid conditions, and risk factors like the source of cooking energy, and properties of the household kitchen.

186

***Household contacts***

Informed consent is obtained from all eligible adult HHCs. For HHC <18 years of age, the guardian is asked to provide informed consent, with assent also sought from children dependent on local guidance. At baseline a questionnaire is administered collecting information on socioeconomic and demographic characteristics, past medical history of TB, HIV and other diseases, exposure risk factors, smoking and alcohol history. The physical examination includes height, weight, mid-upper arm circumference and blood pressure

1  
2  
3 194 measurement. In addition, all HHCs are offered free HIV testing according to the National  
4  
5 195 Guidelines. All people with confirmed HIV infection will have CD4 counts performed and be  
6  
7 196 referred for TB preventive therapy. Those not yet on antiretroviral therapy (ART) and those  
8  
9 197 who interrupted ART are referred for ART at local services.  
10

11 198  
12  
13 199 Point of care HbA1c (A1cCare, SD Biosensor, Gyeonggi-do, Republic of Korea) and  
14  
15 200 haemoglobin (Hemocue 301+, Hemocue, Angelholm, Sweden) tests and spirometry (including  
16  
17 201 pre- and post-bronchodilation with inhaled salbutamol) are performed at baseline or the six-  
18  
19 202 month visit. HHCs who did not take up HIV testing or other screening at baseline are offered  
20  
21 203 these tests at each study visit. Any HHCs with test results requiring treatment or further  
22  
23 204 investigations are referred for respective services.  
24

25 205  
26  
27 206 HHCs are screened for TB using the WHO symptom questionnaire and a digital chest-  
28  
29 207 radiograph (dCXR), reviewed by a clinical officer. dCXRs are not performed in pregnant HHCs.  
30  
31 208 HHCs with a positive WHO symptom screening and abnormal dCXR are asked to provide  
32  
33 209 sputum samples for TB investigations i.e., for GeneXpert and mycobacterial culture. Those  
34  
35 210 with negative symptom screen and normal dCXR are asked to provide a spontaneous sputum  
36  
37 211 sample for storage (with sputum induction performed if required).  
38

39 212  
40  
41 213 At baseline, urine, serum, plasma, whole blood (native, and with RNA preservation in  
42  
43 214 PAXgene® tubes [BD Biosciences, NJ, USA]) are stored. A finger-prick sample is taken and  
44  
45 215 investigated using the Xpert TB Host Response RUO Prototype cartridge (Cepheid,  
46  
47 216 Sunnyvale, CA, USA). T-cell Activation Marker Tuberculosis (TAM-TB) assay and Interferon  
48  
49 217 Gamma Release Assay (IGRA; STANDARDTM F TB-Feron FIA (IFN-gamma; SD Biosensor,  
50  
51 218 Republic of Korea), are performed on fresh venous blood. In Tanzania and Mozambique,  
52  
53 219 storage of peripheral blood mononuclear cells for later characterization of the TB-specific  
54  
55 220 immune response is also performed.  
56  
57 221

1  
2  
3 222 Procedures for follow-up and unwell visits are similar to those at baseline. Measurement of  
4  
5 223 HIV status, haemoglobin, HbA1c, spirometry, CD4 count and IGRA testing are not performed  
6  
7 224 at follow-up visits, unless not done previously. At the last scheduled visit all HHCs not known  
8  
9 225 to have HIV are re-offered HIV testing and a spontaneous or induced sputum sample is stored  
10  
11 226 for all participants.  
12

13  
14 227

15 228 ***Household contacts screening positive for TB symptoms and/or with a DCXR***  
16  
17 229 ***suggestive of TB***

18  
19  
20 230 HHCs screening positive for symptoms and/or those with DCXRs suggestive of TB are asked  
21  
22 231 for a sputum sample, which is investigated using Xpert MTB/RIF Ultra (Cepheid). If this sample  
23  
24 232 is positive for *Mtb* (including a trace result), a minimum of two additional sputum samples are  
25  
26 233 investigated, following decontamination, with Xpert MTB/RIF Ultra, solid and liquid culture.  
27  
28 234 Isolates stored from these cultures will be sequenced for matching with the IC isolates in order  
29  
30 235 to verify intra-household transmission. Sputum induction is performed for those unable to  
31  
32 236 provide a spontaneous sputum sample. HHCs with microbiologically confirmed TB are referred  
33  
34 237 for TB treatment to the National TB Programme.  
35

36  
37 238

38  
39 239 ***Patient and public involvement***

40  
41 240 The ERASE-TB study sites have established Community Advisory Boards, which are voices  
42  
43 241 of communities, people affected, and study participants, providing a strategic link between the  
44  
45 242 communities and the study team. Community Advisory Boards meet regularly and provide  
46  
47 243 feedback on design, procedures and conduct of the study. They will also be closely involved  
48  
49 244 in the dissemination of study results. In addition to the Community Advisory Boards, each study  
50  
51 245 site conducts community engagement activities focused on young people with the aim to foster  
52  
53 246 interest in science and research, specifically in the field of respiratory diseases/illness. This  
54  
55 247 includes close partnership with schools and universities. Furthermore, planned qualitative  
56  
57 248 research will specifically aim to understand the perceptions of HHCs with regards to TB  
58  
59 249 diagnostics and screening.  
60

250

**251 Sample size**

252 An estimated 800 to 900 TB-confirmed ICs are required for the subsequent enrollment of an  
253 anticipated 2,100 HHCs, i.e., 700 HHCs per country. Loss to follow-up of HHCs is estimated  
254 to be 10%. A total of 64 HHCs (3%) are estimated to be diagnosed with TB during the study  
255 period, based on previous active case finding studies among HHCs [16].

256

**257 Novel test candidates**

258 A range of novel test candidates targeted at pathogen detection or identification of host  
259 responses to *Mtb* are being applied, either in real-time (for all participants) or retrospectively  
260 (in a case-control design). Whilst a number of novel test candidates have been pre-specified,  
261 the ERASE-TB biobanking processes allow for addition of further candidate tests to be  
262 evaluated on stored samples as they become available.

263

264 DCXRs offer good sensitivity for diagnosis of pulmonary TB. However, high inter- and intra-  
265 investigator variability, and lack of trained interpreters present a barrier to implementation in  
266 many high-TB burden settings. Computer-aided interpretation systems, such as CAD4TB  
267 (Delft Imaging, Hertogenbosch, Netherlands) and qXR (Qure.ai, India) may increase image-  
268 reading capacity, with good performance, and serve, therefore, as a systematic screening tool  
269 to identify individuals in need of confirmatory TB tests [17,18].

270

271 Xpert MTB/RIF Ultra is a nucleic acid amplification test for *Mtb* with a lower limit of detection  
272 compared to the previous Xpert MTB/RIF generation, and, therefore, conferring higher  
273 sensitivity in paucibacillary specimens. This, however, comes at the expense of specificity,  
274 particularly in high TB incidence settings, resulting in 'false positives' [19]. WHO guidelines  
275 recommend Xpert MTB/RIF Ultra for TB diagnosis among adults and children acknowledging  
276 that further evaluation, particularly of the role of Xpert MTB/RIF Ultra for TB screening, is  
277 needed [20,21].

1  
2  
3 278  
4  
5 279 FLOW-TB is an advanced enzyme-linked immunosorbent assay for the detection of *Mtb*  
6  
7 280 lipoarabinomannan (a mycobacterial cell wall component) in urinary specimens with results  
8  
9 281 available within 65 minutes [22].  
10

11 282  
12  
13 283 The T-cell activation marker-TB assay (TAM-TB) detects *Mtb*-specific CD4 T-cells through *in-*  
14  
15 284 *vitro* antigen stimulation with *Mtb*-derived peptides, i.e., from ESAT-6 and CFP-10, followed by  
16  
17 285 flow cytometry. TAM-TB discriminated latent *Mtb* infection from TB in freshly collected blood  
18  
19 286 with 83% sensitivity and 96-98% specificity in previous studies. Further, TAM-TB may detect  
20  
21 287 early TB disease progression up to 9 months prior to the identification of *Mtb* in sputum [23–  
22  
23 288 25].  
24  
25

26 289  
27  
28 290 Multiple transcriptomic signatures, capturing the host response to TB, have been described as  
29  
30 291 promising candidate tests for earlier TB diagnosis (up to two years before microbiological  
31  
32 292 diagnosis). An individual patient data meta-analysis suggested equivalent performance of  
33  
34 293 eight signatures, with 25-40% sensitivity and 92-95% specificity 0-24 months before TB  
35  
36 294 diagnosis. Diagnostic accuracy of each signature improved as the interval between testing and  
37  
38 295 microbiological TB diagnosis shortened [26]. Several signatures have been developed into  
39  
40 296 polymerase chain reaction (PCR)-based assays to facilitate real-time implementation: the  
41  
42 297 recent CORTIS trial reported sensitivity of 48% and specificity of 75% for incipient TB for the  
43  
44 298 RISK-11 signature [27]. Cepheid have developed a 3-transcript TB score into a fully automated  
45  
46 299 in-cartridge PCR assay performed on finger-prick blood using the Xpert platform (Xpert TB  
47  
48 300 Host Response RUO Prototype cartridge). This cartridge will be evaluated using freshly  
49  
50 301 collected specimens in ERASE-TB; storage of RNA-stabilised blood samples also allows for  
51  
52 302 retrospective evaluation of additional transcriptomic signatures in our cohort [28,29]  
53  
54

55 303  
56  
57 304 An alternative approach to capture the host response to TB is through protein-based biomarker  
58  
59 305 signatures. Candidate tests in this category include a serum- or plasma-based multiplex assay



1  
2  
3 306 assessing 13 protein biomarkers (CRP, procalcitonin[30], sTREM-1[31,32], angiopoietin-  
4  
5 307 2[33,34], interleukin-6[35], TRAIL[36] and IP-10[37]) that is being developed by the London  
6  
7 308 School of Hygiene and Tropical Medicine; in addition, a seven biomarker signature is under  
8  
9 309 development as a point-of-care test for TB diagnosis, with 94% sensitivity and 73% specificity  
10  
11 310 detected in previous work [38].  
12

13  
14 311

## 15 312 **Statistical analyses**

16  
17 313 Baseline characteristics and analytical data will be summarized using descriptive statistics  
18  
19 314 inclusive of mean, median, range, standard deviation, and absolute as well as relative  
20  
21 315 frequencies depending on the nature of data. A logistic regression model will be used to identify  
22  
23 316 characteristics of TB among ICs, households and HHCs that are predictive of incident TB.  
24  
25 317 From the study database, we will simulate algorithms of different tests to obtain the testing  
26  
27 318 combination with the best accuracy. We will couple tests with a mathematical model that  
28  
29 319 quantifies the risk of infection and/or disease to enhance predictive performance. The reporting  
30  
31 320 of the development of the prediction model will follow the Transparent Reporting of a  
32  
33 321 multivariable prediction model for Individual Prognosis Or Diagnosis (TRIPOD) Initiative [39].  
34  
35

36  
37 322

38  
39 323 The validation of novel diagnostic tests for detecting TB will be analysed as a 1:4 matched  
40  
41 324 nested case-control study with HHCs diagnosed with TB at baseline and during follow-up  
42  
43 325 serving as cases, and HHCs who do not develop TB during follow-up as controls; controls will  
44  
45 326 be matched for site, age, sex, HIV status and other risk factors for developing TB. Sensitivity  
46  
47 327 and specificity of novel tests will be determined using pre-existing positive/negative cut-offs  
48  
49 328 where these exist; and receiver operating curves (ROC) constructed with area under the ROC  
50  
51 329 curve calculated. For tests aiming to identify individuals at high risk of TB in the future, only  
52  
53 330 HHCs who are diagnosed with TB during follow-up will serve as cases (i.e. those diagnosed  
54  
55 331 with TB at baseline will be excluded). Stored samples from all timepoints will be retrieved and  
56  
57 332 diagnostic accuracy (i.e. sensitivity and specificity) of the novel test determined at different  
58  
59  
60



1  
2  
3 333 time-points before TB diagnosis. The decision of assigning the “active TB” endpoints to  
4  
5 334 participants will be blinded from the new test results to avoid inclusion bias.

6  
7 335

8  
9 336 **Data management**

10  
11 337 All source data will be kept confidential in secured locations with restricted access by  
12  
13 338 authorized personnel only inclusive of monitors, auditors and reviewers of ethical and  
14  
15 339 regulatory committees in line with applicable data privacy regulations. Each participant is  
16  
17 340 asked to consent to this handling of the data, and is assigned a pseudonymous identification  
18  
19 341 number that is used throughout the study on all source data.

20  
21  
22 342

23  
24 343 Accurate documentation of paper-based and electronic source data, e.g., original records and  
25  
26 344 certified copies of original records, progress notes, screening logs, and recorded data from  
27  
28 345 automated instruments, will be maintained. The pseudonymized clinical data captured on  
29  
30 346 paper-based Case Report Forms will be entered at the sites into a database using the web-  
31  
32 347 based Clinical Data Management System of OpenClinica (OpenClinica LLC, Waltham, MA,  
33  
34 348 USA). The study specific database has been built, maintained and hosted by the LMU Klinikum  
35  
36 349 on a centralized secure server. Data modifications and necessary corrections performed in the  
37  
38 350 database also within the context of double data entry will be documented and tracked in audit  
39  
40 351 trails. Data quality and plausibility are assured by a series of pre-programmed edit and range  
41  
42 352 checks in OpenClinica. Further validation checks are programmed in Stata (Statacorp, College  
43  
44 353 Station, TX, USA) with extracts of the database and electronically received data, e.g.,  
45  
46 354 spirometry, dCXR and laboratory, will be integrated into analyses of datasets.

47  
48  
49 355

50  
51 356 **Monitoring**

52  
53 357 Assigned study monitors will visit the sites at regular intervals physically and/or virtually in  
54  
55 358 addition to frequent day-to-day communication. Close follow-up on all study-related aspects  
56  
57 359 will be performed to ascertain compliance with standards of Good Clinical Practice, the  
58  
59 360 Declaration of Helsinki, and other local and national regulatory guidelines inclusive of

1  
2  
3 361 guidelines for infection prevention and control of airborne-transmitted diseases, e.g., social  
4  
5 362 distancing in well-ventilated spaces, and wearing of personal protective equipment. In  
6  
7 363 particular, monitors that support designated study personnel are responsible to verify (I)  
8  
9 364 adequacy of the study personnels' qualifications and facilities, (II) accuracy of informed  
10  
11 365 consent procedures and patient eligibility, (III) adherence to the study protocol, (IV) protection  
12  
13 366 of rights and well-being of participants, (V) adherence to infection prevention and control  
14  
15 367 measures (VI) accuracy and completeness of study documents and other study-related  
16  
17 368 records, and (VII) maintenance of source documents.  
18  
19  
20 369

### 21 22 370 **Ethics and dissemination**

23  
24 371 The study protocol and informed consent/assent documents have been approved by regulatory  
25  
26 372 and ethical committees of the participating institutions. This includes the Medical Research  
27  
28 373 Council in Zimbabwe, the National Health Research Ethics Committee in Tanzania, the  
29  
30 374 National Bioethics for Health Committee in Mozambique, and the ethical committees of London  
31  
32 375 School of Hygiene & Tropical Medicine, United Kingdom, and the medical faculty of the  
33  
34 376 Ludwig-Maximilians-Universität München, Germany.  
35  
36  
37 377

38  
39 378 Adult ICs and HHCs are asked for written informed consent prior to their participation.  
40  
41 379 Underage HHCs are asked for assent in addition to obtaining the consent of their legal  
42  
43 380 guardians/parents; with ages for assent depending on local guidance. In case of illiteracy, the  
44  
45 381 participant is asked to give its consent by fingerprint while an adult impartial, literate witness  
46  
47 382 present during the entire consent procedure signs the consent on behalf. All participants have  
48  
49 383 the right to withdraw from the study at any time. Findings derived from ERASE-TB will be  
50  
51 384 presented at scientific conferences, and published in peer-reviewed international journals.  
52  
53  
54 385

### 55 56 386 **Current study status**

57  
58 387 The recruitment of ICs and HHCs is in progress in Zimbabwe, Mozambique and Tanzania  
59  
60 388 since March, August and September 2021, respectively. The follow-up of HHCs is anticipated

389 to be completed in March, August and September 2023 in Zimbabwe, Mozambique and  
390 Tanzania, respectively; laboratory analyses are estimated to be performed by December 2024.

391

### 392 **Author contributions**

393 The study proposal and protocol were written by NH, KK with scientific input from CK, TM, CG,  
394 JM. ETM, UP, DB, AM wrote the initial manuscript with scientific input on the database and  
395 data management section from FR, TA. NH, KK critically reviewed the initial draft of the  
396 manuscript. KH, GK, CJC, ENN, TA, provided critical feedback on the manuscript. All authors  
397 have read and approved the final version of the manuscript.

398

### 399 **Funding statement**

400 ERASE-TB is part of the EDCTP2 programme supported by the European Union (grant  
401 number RIA2018D-2508-ERASE-TB), the German Center for Infection Research (DZIF) grant  
402 number: 02.710 and the Swedish Research Council (220-23602). CJC is funded by the  
403 Wellcome Trust (203905/Z/16/Z). Cepheid, Inc., and SD Biosensor provided test kits and  
404 analyzers at no cost to the Consortium.

405

### 406 **Acknowledgments**

407 We are grateful to the study personnel from the Biomedical Research and Training Institute  
408 and the Zvitambo Research Institute, Zimbabwe, the Instituto Nacional de Saúde,  
409 Mozambique, and the National Institute for Medical Research - Mbeya Medical Research  
410 Centre, Tanzania for their exceptional efforts and contributions, which made this research  
411 possible.

412

### 413 **Consortium authorship**

414 The following are members of the ERASE-TB consortium: Anna Shepherd<sup>a</sup>, Hazel M Dockrell<sup>a</sup>,  
415 Judith Bruchfeld<sup>b</sup>, Christopher Sundling<sup>b</sup>, Charles Sandy<sup>c</sup>, Mishelle Mugava<sup>c</sup>, Tsitsi  
416 Bandason<sup>c</sup>, Martha Chipinduro<sup>c</sup>, Kuda Mutasa<sup>d</sup>, Sandra Rukobo<sup>d</sup>, Lwitiho Sudi<sup>e</sup>, Antelmo

1  
2  
3 417 Haule<sup>e</sup>, Emmanuel Sichone<sup>e</sup>, Paschal Qwaray<sup>e</sup>, Bariki Mtafya<sup>e</sup>, Harrieth Mwambola<sup>e</sup>, Lilian  
4  
5 418 Minja<sup>e</sup>, Issa Sabi<sup>e</sup>, Peter Edwin<sup>e</sup>, Dogo Ngalison<sup>e</sup>, Stella Luswema<sup>e</sup>, Willyhelmina Olomi<sup>e</sup>,  
6  
7 419 Doreen Pamba<sup>e</sup>, Simeon Mwanyonga<sup>e</sup>, Celina Nhamuave<sup>f</sup>, António Machiana<sup>f</sup>, Carla Madeira<sup>f</sup>,  
8  
9 420 Emelva Manhiça<sup>f</sup>, Nádia Siteo<sup>f</sup>, Jorge Ribeiro<sup>f</sup>, Christof Geldmacher<sup>g</sup>, Andrea Rachow<sup>g</sup>, Olena  
10  
11 421 Ivanova<sup>g</sup>, Laura Olbrich<sup>g</sup>, Elmar Saathoff<sup>g</sup>, Michael Hoelscher<sup>g</sup>.

12  
13  
14 422

15  
16 423 <sup>a</sup>Faculty of Infectious and Tropical Diseases, Department of Infection Biology, London School  
17  
18 424 of Hygiene & Tropical Medicine, London, UK

19  
20 425 <sup>b</sup>Karolinska Institute, Stockholm, Sweden

21  
22 426 <sup>c</sup>Biomedical Research and Training Institute, Harare, Zimbabwe

23  
24 427 <sup>d</sup>Zvitambo Research Institute, Harare, Zimbabwe

25  
26 428 <sup>e</sup>National Institute for Medical Research - Mbeya Medical Research Centre, Mbeya, Tanzania

27  
28 429 <sup>f</sup>Instituto Nacional de Saúde, Marracuene, Mozambique

29  
30 430 <sup>g</sup>Division of Infectious Diseases and Tropical Medicine, University Hospital, LMU Munich,  
31  
32 431 Munich, Germany

33  
34  
35 432

36  
37 433 **Competing interests statement**

38  
39 434 None declared.

40  
41 435

42  
43 436 **Disclaimer**

44  
45 437 Not applicable.  
46  
47  
48  
49  
50  
51  
52  
53  
54  
55  
56  
57  
58  
59  
60

## References

- 1 Global tuberculosis report 2021.  
<https://www.who.int/publications/i/item/9789240037021> (accessed 28 Oct 2021).
- 2 The end TB STRategy global strategy and targets for tuberculosis prevention, care and control after 2015 a. Published Online First: 2014.  
[https://www.who.int/tb/strategy/End\\_TB\\_Strategy.pdf](https://www.who.int/tb/strategy/End_TB_Strategy.pdf) (accessed 28 Oct 2021).
- 3 WHO. Global Tuberculosis Report. 2020.  
<https://www.who.int/publications/i/item/9789240013131> (accessed 31 Jul 2021).
- 4 Snider B, Patel B, McBean E. Asymptomatic Cases, the Hidden Challenge in Predicting COVID-19 Caseload Increases. *Infect Dis Reports 2021, Vol 13, Pages 340-347* 2021;**13**:340–7. doi:10.3390/IDR13020033
- 5 TB Disease - Symptoms, treatment & prevention - TBFacts. <https://tbfacts.org/tb-disease/> (accessed 28 Aug 2021).
- 6 Honeyborne I, McHugh TD, Phillips PPJ, *et al*. Molecular Bacterial Load Assay, a Culture-Free Biomarker for Rapid and Accurate Quantification of Sputum Mycobacterium tuberculosis Bacillary Load during Treatment. *J Clin Microbiol* 2011;**49**:3905. doi:10.1128/JCM.00547-11
- 7 UNAIDS. UNAIDS Global AIDS Update. 2021.  
[https://www.unaids.org/sites/default/files/media\\_asset/2021-global-aids-update\\_en.pdf](https://www.unaids.org/sites/default/files/media_asset/2021-global-aids-update_en.pdf) (accessed 28 Oct 2021).
- 8 ZIMBABWE POPULATION CENSUS 2012 WOMEN AND MEN PROFILE SUMMARY REPORT. Published Online First: 2016.  
<https://www.zimstat.co.zw/wp-content/uploads/publications/Social/Gender/Women-and-Men-Report-2012.pdf> (accessed 15 Oct 2021).
- 9 Tanzania Census 2012 - Dashboard. <http://dataforall.org/dashboard/tanzania/> (accessed 15 Oct 2021).
- 10 ZIMBABWE POPULATION-BASED HIV IMPACT ASSESSMENT ZIMPHIA 2020 KEY FINDINGS. [https://phia.icap.columbia.edu/wp-content/uploads/2020/11/ZIMPHIA-2020-Summary-Sheet\\_Web.pdf](https://phia.icap.columbia.edu/wp-content/uploads/2020/11/ZIMPHIA-2020-Summary-Sheet_Web.pdf) (accessed 3 Sep 2021).
- 11 Xadrique H, Maunze A, Dade M, *et al*. IV RECENSEAMENTO GERAL DA POPULAÇÃO E HABITAÇÃO. 2017. <http://www.ine.gov.mz/iv-rgph-2017/mocambique/censo-2017-brochura-dos-resultados-definitivos-do-iv-rgph-nacional.pdf> (accessed 31 Jul 2021).
- 12 Population of Cities in Zimbabwe (2021). <https://worldpopulationreview.com/countries/cities/zimbabwe> (accessed 3 Aug 2021).
- 13 World atlas. <https://knoema.com/atlas/United-Republic-of-Tanzania>. (accessed 26 Jul 2021).
- 14 Prevalence of HIV, total (% of population ages 15-49) | Data. <https://data.worldbank.org/indicator/SH.DYN.AIDS.ZS?locations=ZW> (accessed 3 Aug 2021).
- 15 Incidence of tuberculosis (per 100,000 people) - Zimbabwe | Data. <https://data.worldbank.org/indicator/SH.TBS.INCD?locations> (accessed 3 Aug 2021).
- 16 Fox GJ, Nhung N V., Sy DN, *et al*. Household-Contact Investigation for Detection of Tuberculosis in Vietnam. *N Engl J Med* 2018;**378**:221–9. doi:10.1056/NEJMOA1700209
- 17 Qin ZZ, Ahmed S, Sarker MS, *et al*. Tuberculosis detection from chest x-rays for triaging in a high tuberculosis-burden setting: an evaluation of five artificial intelligence algorithms. *Lancet Digit Heal* 2021;**3**:e543–54. doi:10.1016/S2589-7500(21)00116-3
- 18 MacPherson P, Webb EL, Kamchedzera W, *et al*. Computer-aided X-ray screening for tuberculosis and HIV testing among adults with cough in Malawi (the PROSPECT study): A randomised trial and cost-effectiveness analysis. *PLoS Med* 2021;**18**:1–17. doi:10.1371/journal.pmed.1003752
- 19 Dorman S, Schumacher S, Alland D, *et al*. Xpert MTB/RIF Ultra for detection of Mycobacterium tuberculosis and rifampicin resistance: a prospective multicentre diagnostic accuracy study. *Lancet Infect Dis* 2018;**18**:76–84. doi:10.1016/S1473-



- 1  
2  
3 494 3099(17)30691-6  
4 495 20 WHO Meeting Report of a Technical Expert Consultation: Non-inferiority analysis of  
5 496 Xpert MTB/RIF Ultra compared to Xpert MTB/RIF. Published Online First:  
6 497 2017.<http://apps.who.int/bookorders>. (accessed 19 Oct 2021).  
7 498 21 World Health Organization. WHO consolidated guidelines on tuberculosis: Module 2:  
8 499 Screening. 2021.<https://www.who.int/publications/i/item/9789240022676> (accessed 9  
9 500 Dec 2021).  
10 501 22 Hamasur B, Bruchfeld J, van Helden P, *et al*. A sensitive urinary lipoarabinomannan  
11 502 test for tuberculosis. *PLoS One* 2015;**10**. doi:10.1371/JOURNAL.PONE.0123457  
12 503 23 Portevin D, Moukambi F, Clowes P, *et al*. Assessment of the novel T-cell activation  
13 504 marker-tuberculosis assay for diagnosis of active tuberculosis in children: a  
14 505 prospective proof-of-concept study. *Lancet Infect Dis* 2014;**14**:931–8.  
15 506 doi:10.1016/S1473-3099(14)70884-9  
16 507 24 Schuetz A, Haule A, Reither K, *et al*. Monitoring CD27 expression to evaluate  
17 508 Mycobacterium tuberculosis activity in HIV-1 infected individuals in vivo. *PLoS One*  
18 509 2011;**6**. doi:10.1371/JOURNAL.PONE.0027284  
19 510 25 Ahmed MIM, Ntinginya NE, Kibiki G, *et al*. Phenotypic Changes on Mycobacterium  
20 511 Tuberculosis-Specific CD4 T Cells as Surrogate Markers for Tuberculosis Treatment  
21 512 Efficacy. *Front Immunol* 2018;**9**:2247. doi:10.3389/FIMMU.2018.02247/BIBTEX  
22 513 26 Gupta RK, Turner CT, Venturini C, *et al*. Concise whole blood transcriptional  
23 514 signatures for incipient tuberculosis: a systematic review and patient-level pooled  
24 515 meta-analysis. *Lancet Respir Med* 2020;**8**:395–406.  
25 516 doi:<http://dx.doi.org/10.1016/S2213-2600%2819%2930282-6>  
26 517 27 Scriba TJ, Fiore-Gartland A, Penn-Nicholson A, *et al*. Biomarker-guided tuberculosis  
27 518 preventive therapy (CORTIS): a randomised controlled trial. *Lancet Infect Dis*  
28 519 2021;**21**:354–65. doi:10.1016/S1473-3099(20)30914-2/ATTACHMENT/EB270186-  
29 520 669A-4F82-8A80-FB38FA1FB796/MMC1.PDF  
30 521 28 Warsinske H, Rao A, Moreira F, *et al*. Assessment of Validity of a Blood-Based 3-  
31 522 Gene Signature Score for Progression and Diagnosis of Tuberculosis, Disease  
32 523 Severity, and Treatment Response. *JAMA Netw open* 2018;**1**:e183779.  
33 524 doi:10.1001/JAMANETWORKOPEN.2018.3779  
34 525 29 Sweeney TE, Braviak L, Tato CM, *et al*. Genome-wide expression for diagnosis of  
35 526 pulmonary tuberculosis: a multicohort analysis. *Lancet Respir Med* 2016;**4**:213–24.  
36 527 doi:10.1016/S2213-2600(16)00048-5  
37 528 30 Mendelson F, Griesel R, Tiffin N, *et al*. C-reactive protein and procalcitonin to  
38 529 discriminate between tuberculosis, Pneumocystis jirovecii pneumonia, and bacterial  
39 530 pneumonia in HIV-infected inpatients meeting WHO criteria for seriously ill: a  
40 531 prospective cohort study. *BMC Infect Dis* 2018;**18**. doi:10.1186/S12879-018-3303-6  
41 532 31 Huang C, Lee L, Ho C, *et al*. High serum levels of procalcitonin and soluble TREM-1  
42 533 correlated with poor prognosis in pulmonary tuberculosis. *J Infect* 2014;**68**:440–7.  
43 534 doi:10.1016/J.JINF.2013.12.012  
44 535 32 Feng J, Su W, Pan S, *et al*. Role of TREM-1 in pulmonary tuberculosis patients-  
45 536 analysis of serum soluble TREM-1 levels. *Sci Rep* 2018;**8**. doi:10.1038/S41598-018-  
46 537 26478-2  
47 538 33 Kumar NP, Velayutham B, Nair D, *et al*. Angiopoietins as biomarkers of disease  
48 539 severity and bacterial burden in pulmonary tuberculosis. *Int J Tuberc Lung Dis*  
49 540 2017;**21**:93. doi:10.5588/IJTLD.16.0565  
50 541 34 Kathamuthu G, Moideen K, Baskaran D, *et al*. Tuberculous lymphadenitis is  
51 542 associated with altered levels of circulating angiogenic factors. *Int J Tuberc Lung Dis*  
52 543 2018;**22**:557–66. doi:10.5588/IJTLD.17.0609  
53 544 35 Sivro A, McKinnon L, Yende-Zuma N, *et al*. Plasma Cytokine Predictors of  
54 545 Tuberculosis Recurrence in Antiretroviral-Treated Human Immunodeficiency Virus-  
55 546 infected Individuals from Durban, South Africa. *Clin Infect Dis* 2017;**65**:819–26.  
56 547 doi:10.1093/CID/CIX357  
57 548 36 La Manna M, Orlando V, Li Donni P, *et al*. Identification of plasma biomarkers for  
58 549 discrimination between tuberculosis infection/disease and pulmonary non tuberculosis

- 1  
2  
3 550 disease. *PLoS One* 2018;**13**. doi:10.1371/JOURNAL.PONE.0192664  
4 551 37 Sivo A, McKinnon L, Yende-Zuma N, *et al*. Plasma Cytokine Predictors of  
5 552 Tuberculosis Recurrence in Antiretroviral-Treated Human Immunodeficiency Virus-  
6 553 infected Individuals from Durban, South Africa. *Clin Infect Dis* 2017;**65**:819–26.  
7 554 doi:10.1093/CID/CIX357  
8 555 38 Chegou NN, Sutherland JS, Malherbe S, *et al*. Diagnostic performance of a seven-  
9 556 marker serum protein biosignature for the diagnosis of active TB disease in African  
10 557 primary healthcare clinic attendees with signs and symptoms suggestive of TB. *Thorax*  
11 558 2016;**71**:785–94. doi:10.1136/thoraxjnl-2015-207999  
12 559 39 Collins GS, Reitsma JB, Altman DG, *et al*. Transparent reporting of a multivariable  
13 560 prediction model for individual prognosis or diagnosis (TRIPOD): The TRIPOD  
14 561 Statement. *BMC Med* 2015;**13**:1–10. doi:10.1186/S12916-014-0241-Z/TABLES/1  
15 562 40 Agency ZS. QUALITY CONTROL MANUAL Provincial Report Harare Central Census  
16 563 Office. [https://www.zimstat.co.zw/wp-](https://www.zimstat.co.zw/wp-content/uploads/publications/Population/population/Harare.pdf)  
17 564 [content/uploads/publications/Population/population/Harare.pdf](https://www.zimstat.co.zw/wp-content/uploads/publications/Population/population/Harare.pdf) (accessed 3 Aug  
18 565 2021).  
19 566 41 Mozambique Population 2021 (Demographics, Maps, Graphs).  
20 567 <https://worldpopulationreview.com/countries/mozambique-population> (accessed 27 Jul  
21 568 2021).  
22 569 42 ZIMBABWE NATIONAL HIV/AIDS AND TUBERCULOSIS CONTROL  
23 570 PROGRAMMES. Republic of Zimbabwe NATIONAL HIV/AIDS AND TUBERCULOSIS  
24 571 CONTROL PROGRAMMES. <https://www.who.int/hiv/pub/guidelines/zimbabwe.pdf>  
25 572 (accessed 1 Sep 2021).  
26 573  
27 574  
28  
29  
30  
31  
32  
33  
34  
35  
36  
37  
38  
39  
40  
41  
42  
43  
44  
45  
46  
47  
48  
49  
50  
51  
52  
53  
54  
55  
56  
57  
58  
59  
60

1  
2  
3 575 **Figure legend**

4  
5 576 **Figure 1.** The ERASE-TB consortium

6  
7 577 Abbreviations: ERASE-TB=Early Risk Assessment in TB contactS by new diagnostic tEsts

8  
9 578

10  
11 579 **Figure 2.** Location and characteristics of ERASE-TB study sites

12  
13 580 Notes: The location of each study site is indicated by a red asterix. Source data used within  
14  
15 581 this figure are taken from the references [7,8,41,42,9–15,40].

16  
17 582 Abbreviations: ERASE=Early Risk Assessment in TB contactS by new diagnostic tEsts;  
18  
19 583 TB=tuberculosis; HIV=human immunodeficiency virus

20  
21  
22 584

23  
24 585 **Figure 3.** Eligibility criteria and schedules of events for index cases and household contacts

25  
26 586 Notes: **A**=depending on the time point of study enrollment and consequently on the duration  
27  
28 587 available for follow-up, i.e. 18 or 24 months, the follow-up visit at 24 months  $\pm$ 30 days may be  
29  
30 588 conditional; **B**=the follow-up visit by phone may be conducted after the last scheduled follow-  
31  
32 589 up visit at 18 months  $\pm$ 30 days or 24 months  $\pm$ 30 days to assess whether symptoms suggestive  
33  
34 590 of TB have occurred, TB diagnosis has been made or anti-TB treatment has been initiated;  
35  
36 591 **C**=unwell visits by phone or on-site may be conducted between scheduled follow-up visits if a  
37  
38 592 participant presents at a recruitment healthcare facility with signs and symptoms suggestive of  
39  
40 593 TB; **D**=coached spontaneous or induced sputum collection for storage at scheduled follow-up  
41  
42 594 visit at 18 months  $\pm$ 30 days or 24 months  $\pm$ 30 days, and for repetition of HIV testing if tested  
43  
44 595 negative at baseline; **E**=coached spontaneous or induced sputum collection upon the decision  
45  
46 596 of the investigating team for testing by Xpert MTB/RIF Ultra if participant presents with signs  
47  
48 597 and symptoms suggestive of TB; **F**=coached spontaneous or induced sputum collection in  
49  
50 598 case of Xpert MTB/RIF Ultra positivity or strong clinical suspicion of TB for repetition of the  
51  
52 599 Xpert MTB/RIF Ultra; **G**=in case of HIV positivity to be followed by the assessment of CD4  
53  
54 600 counts; **H**=CXR to be conducted at an unscheduled on-site unwell visit upon the decision of  
55  
56 601 the investigating team depending on the nature of symptoms reported, and the time elapsed  
57  
58 602 since the last CXR including its findings; **I**=not to be conducted among pregnant women;



1  
2  
3 603 **J**=stored venous blood includes 6mL EDTA blood for whole blood and plasma, 4mL serum  
4  
5 604 and 2.5mL PAXgene blood, all samples will be deep frozen for retrospective testing using new  
6  
7 605 diagnostics as described in text; **K**=in case the evaluation of symptoms of a participant unable  
8  
9 606 to present at a recruitment healthcare facility is required an unscheduled on-site or home visit  
10  
11 607 will be arranged by phone, the resolution of symptoms can alternatively be addressed by  
12  
13 608 phone; **L**=collection of PBMC at baseline and follow-up visit at 6 months  $\pm$ 30 days is optional,  
14  
15 609 thus will not be performed at each participating site and for each participant; **M**=in case the  
16  
17 610 evaluation of symptoms of a participant unable to present at a recruitment healthcare facility  
18  
19 611 is required or doubtful if required an unscheduled unwell visit by phone will be arranged, the  
20  
21 612 resolution of symptoms can alternatively be addressed by phone; **N**=spirometry and/or  
22  
23 613 diabetes (HbA1c) will be performed at scheduled follow-up visits at 6 months  $\pm$ 30 days, 12  
24  
25 614 months  $\pm$ 30 days and 18 or 24 months  $\pm$ 30 days if required or not performed at baseline,  
26  
27 615 anaemia (Hb) will be performed at baseline and scheduled follow-up visits at 6 months  $\pm$ 30  
28  
29 616 days, 12 months  $\pm$ 30 days and 18 or 24 months  $\pm$ 30 days if possible; **O**=blood pressure  
30  
31 617 measurement will be performed at baseline and scheduled follow-up visits at 6 months  $\pm$ 30  
32  
33 618 days, 12 months  $\pm$ 30 days and 18 or 24 months  $\pm$ 30 days; **P**=WGS to be performed once *Mtb*  
34  
35 619 infection is confirmed and an isolate could be recovered.

36  
37  
38  
39 620 Abbreviations: TB=tuberculosis; WHO=World Health Organization; HIV=human  
40  
41 621 immunodeficiency virus; WGS=whole genome sequencing; MBLA=molecular bacterial load  
42  
43 622 assay; CXR=chest radiograph; IGRA=interferon gamma release assay; PBMC=peripheral  
44  
45 623 blood mononuclear cell; TAM-TB=T- cell activation marker tuberculosis; MTB=*Mycobacterium*  
46  
47 624 *tuberculosis*; RIF=rifampicin, Hb=haemoglobin; HbA1c=glycated hemoglobin;  
48  
49 625 LAM=lioparabinomannan; CD4=cluster of differentiation 4

50  
51 626

#### 52 53 627 **Figure 4.** Study design

54  
55 628 Abbreviations: HHC=household contact; TB=tuberculosis; IC=index case; WHO=World  
56  
57 629 Health Organization; CXR= chest radiograph; SS=symptom score; MTB=*Mycobacterium*  
58  
59 630 *tuberculosis*; RIF=rifampicin; pos=positive; CT=computer tomography; FU=follow-up

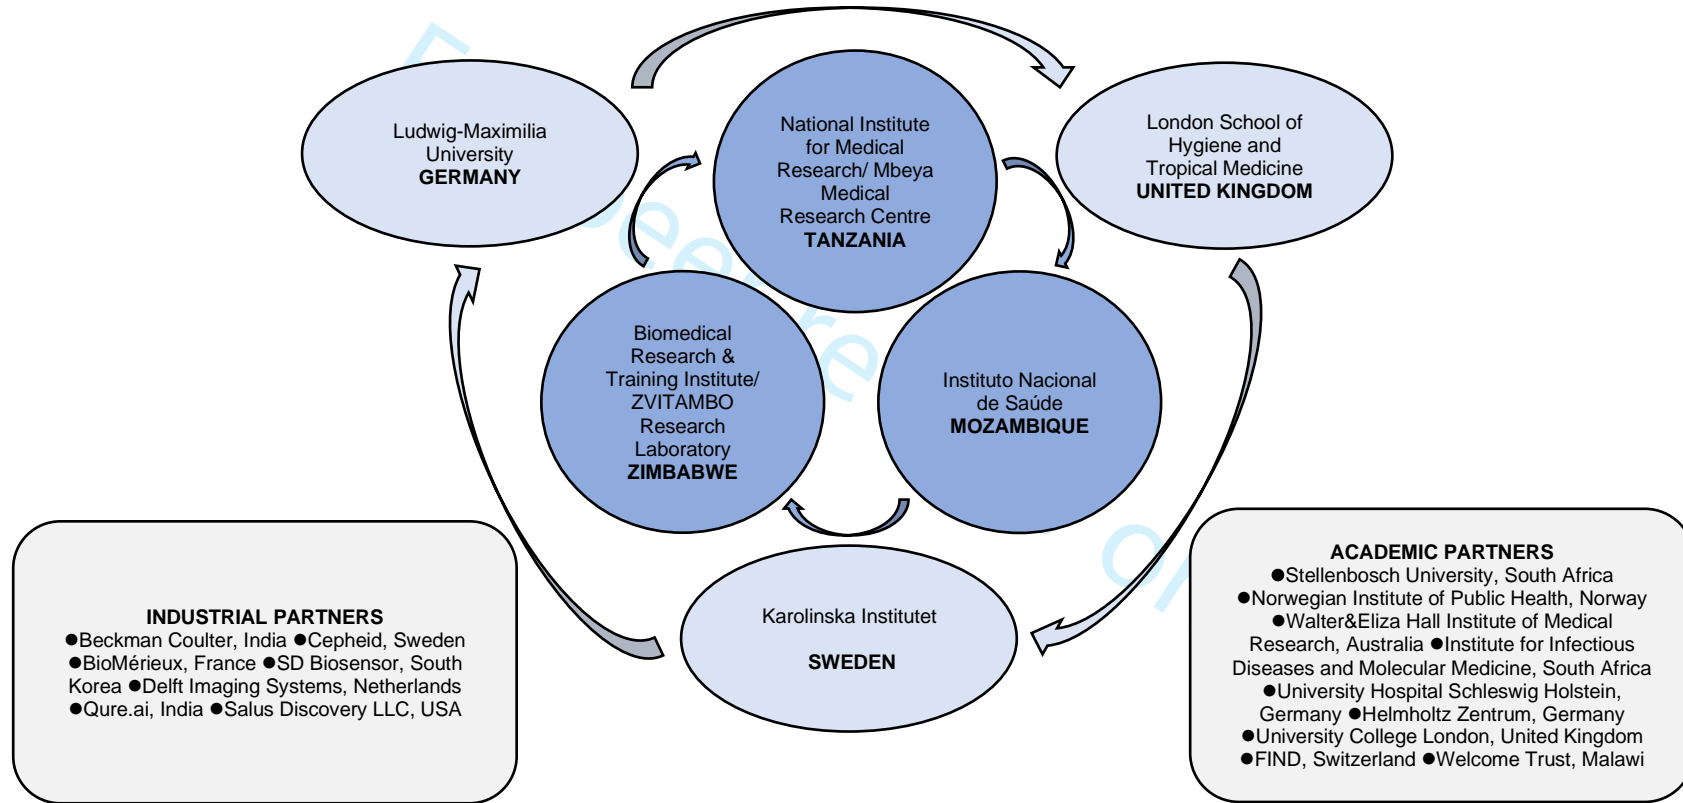

Figure 1. The ERASE-TB consortium

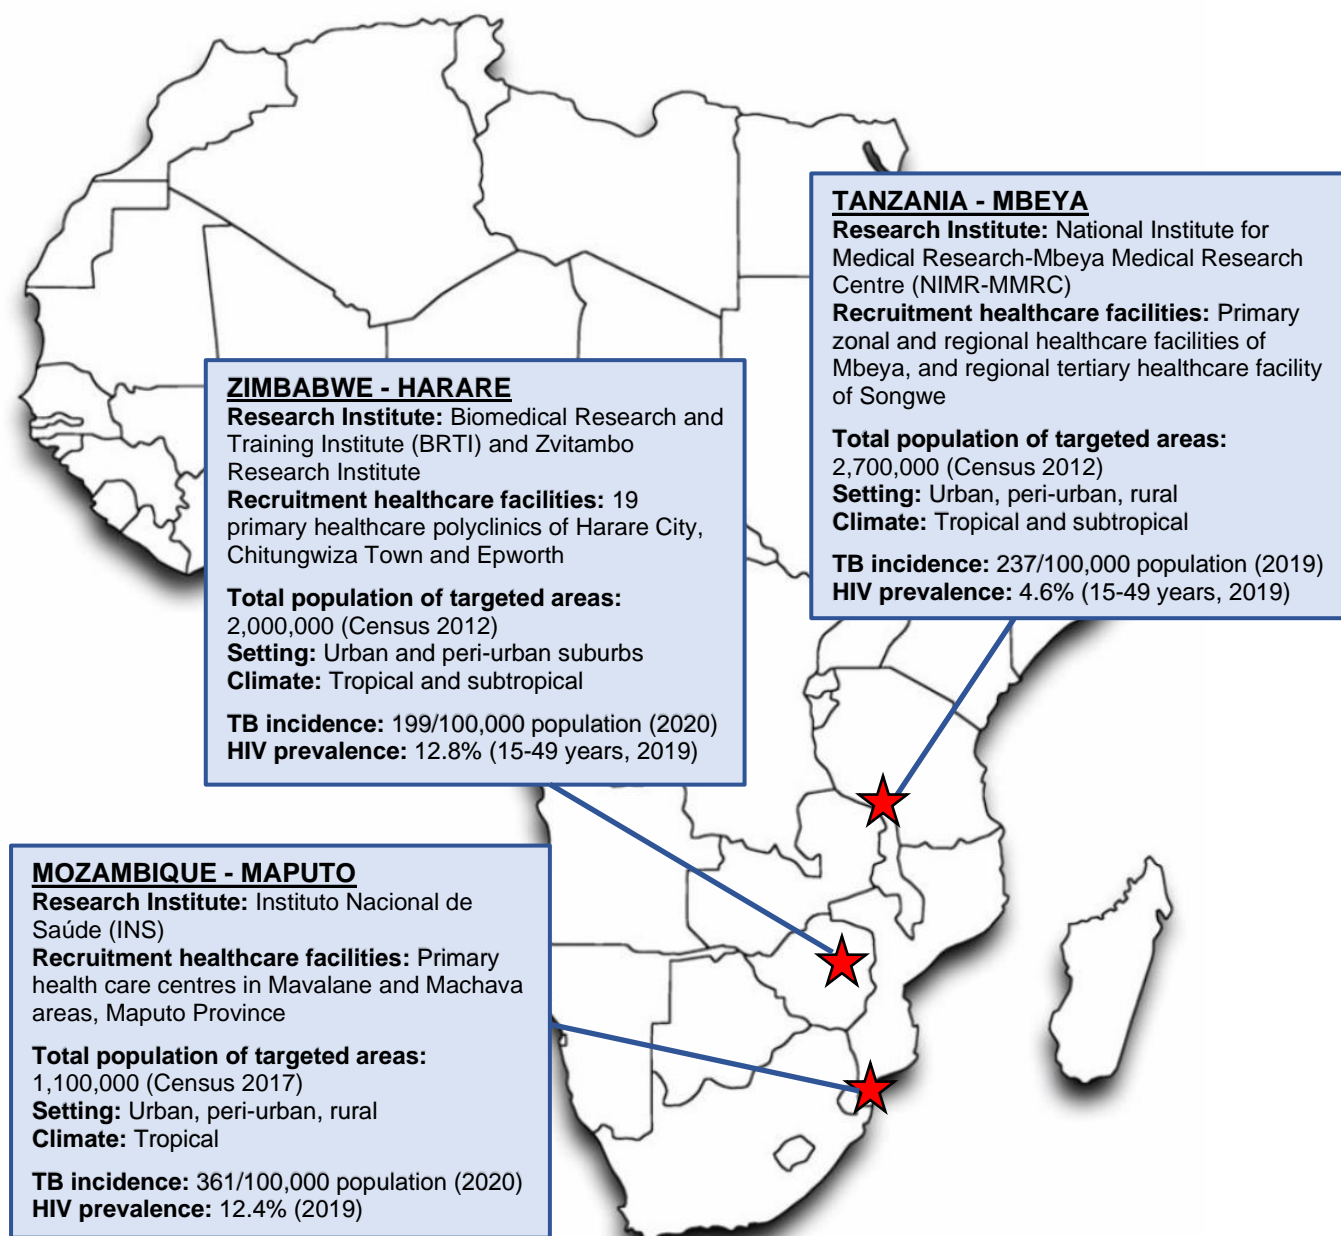

**Figure 2.** Location and characteristics of ERASE-TB study sites

**INDEX CASE**

**HOUSEHOLD CONTACT**

**INCLUSION CRITERIA**

- Aged ≥18 years
- Living with at least another person aged ≥10 years in the same household with a firm unchanged address for 6 months
- Pulmonary TB diagnosis within 4 weeks prior to enrolment
- Spontaneous sputum production
- Positive sputum smear, i.e. >+2 positivity by Ziehl-Neelsen stain or Auramine-O stain OR ≥+1 positivity on WHO symptom scale OR ≥medium positivity by GeneXpert (if no microscopy performed)
- <7 daily doses of anti-TB treatment since diagnosis
- Voluntary written informed consent obtained

**EXCLUSION CRITERIA**

- Treatment for TB within the past 30 days OR on current TB treatment OR on current preventive TB therapy (if HIV negative) at the time of enrolment

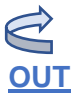

**INCLUSION CRITERIA**

- Aged ≥10 years
- Substantial exposure, i.e. spending ≥3 nights/week over the past 4 weeks in the same household as the index case,
- Voluntary written informed consent or parent/guardian consent & assent in case of minors obtained

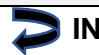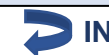

**EVENTS AT BASELINE/SCREENING VISIT**

- Administration of socio-demographic questionnaire
  - Assessment of vital signs, medical history
  - Digital CXR (if available)<sup>I</sup>
- Specimen investigations**
- Sputum: culture, storage, WGS, MBLA

**EVENTS AT BASELINE/ ±14days of SCREENING VISIT**

- Administration of socio-demographic questionnaire
  - Assessment vital signs, medical history
  - Screening for diabetes (HbA1c)<sup>N</sup>, high blood pressure<sup>O</sup>, anaemia (Hb)<sup>N</sup>, WHO TB symptoms
  - Digital CXR<sup>I</sup>, spirometry<sup>N</sup>
- Specimen investigations**
- Sputum: Xpert MTB/RIF Ultra<sup>E</sup>, culture<sup>F</sup>, storage, WGS<sup>P</sup>
  - Blood: HIV/CD4 counts<sup>G</sup>, Cepheid host response, TAM-TB, IGRA SD Biosensor, PBMC<sup>L</sup>, storage<sup>J</sup>
  - Urine: dipstick/LAM, storage

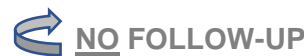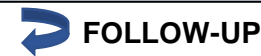

**EVENTS AT UNSCHEDULED UNWELL VISIT(S)**  
(phone/on-site)<sup>C,K,M</sup>

- Assessment of vital signs, medical history
  - Screening for high blood pressure, WHO TB symptoms,
  - Digital CRX<sup>H,I</sup>
- Specimen investigations**
- Sputum: Xpert MTB/RIF Ultra, culture, storage, WGS<sup>P</sup>
  - Blood: Cepheid host response, TAM-TB, storage<sup>J</sup>
  - Urine: dipstick/LAM, storage

**EVENTS AT UN-SCHEDULED FOLLOW-UP VISIT(S)<sup>B</sup>** (phone)

- Assessment of medical history
  - Screening for WHO TB symptoms
- Specimen investigations**
- None

**EVENTS AT 6months ±30days/ 12months ±30days/ 18months ±30days/ 24months ±30days<sup>A</sup> FOLLOW-UP VISITS**

- Assessment of vital signs, medical history
  - Screening for high blood pressure, WHO TB symptoms
  - Digital CXR<sup>I</sup>, spirometry<sup>N</sup>
- Specimen investigations**
- Sputum: Xpert MTB/RIF Ultra<sup>E</sup>, culture<sup>F</sup>, storage<sup>D</sup>, WGS<sup>P</sup>
  - Blood: Cepheid host response, TAM-TB, PBMC<sup>L</sup>, storage
  - Urine: dipstick/LAM, storage<sup>J</sup>

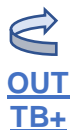

Optional

Optional

1  
2  
3  
4  
5  
6  
7  
8  
9  
10  
11  
12  
13  
14  
15  
16  
17  
18  
19  
20  
21  
22  
23  
24  
25  
26  
27  
28  
29  
30  
31  
32  
33  
34  
35  
36  
37  
38  
39  
40  
41  
42  
43  
44  
45  
46

**Figure 3.** Eligibility criteria and schedules of events for index cases and household contacts

For peer review only

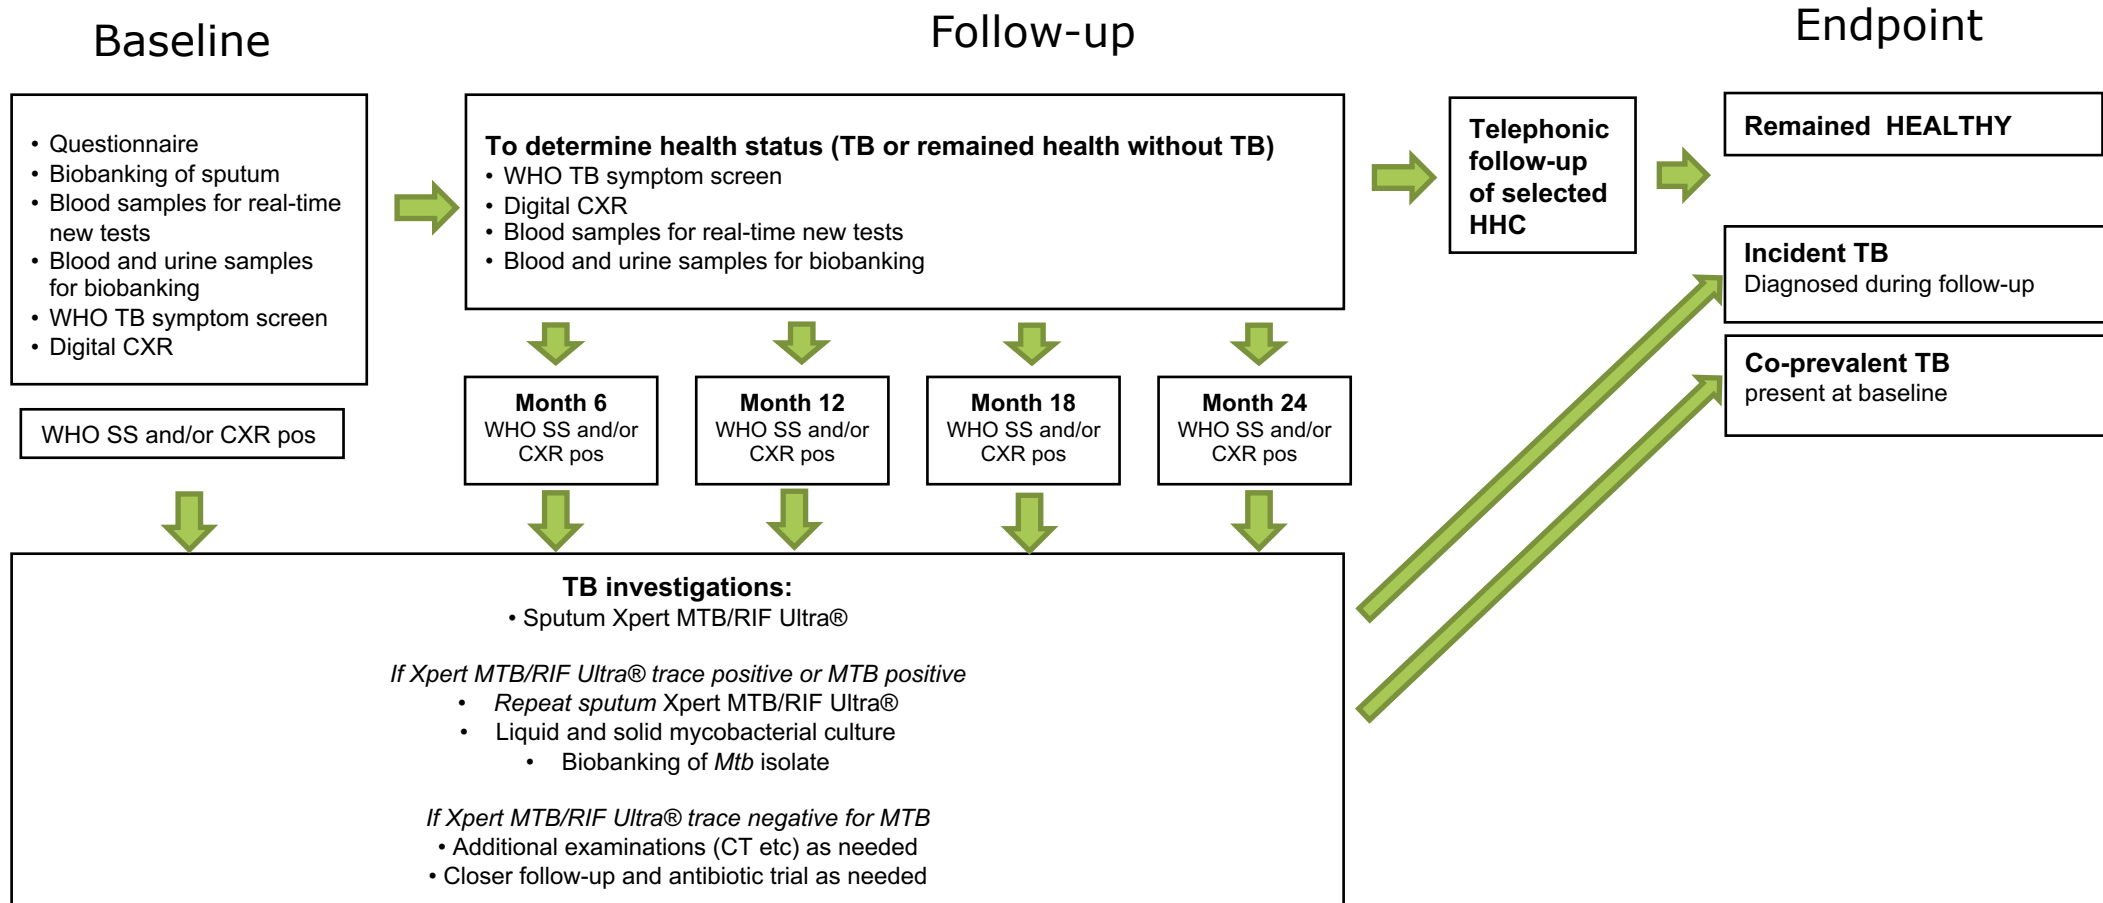

Figure 4. Study design.

# BMJ Open

## Early risk assessment in pediatric and adult household contacts of confirmed tuberculosis cases by novel diagnostic tests (ERASE-TB): protocol for a prospective, non-interventional, longitudinal, multi-country cohort study

|                                 |                                                                                                                                                                                                                                                                                                                                                                                                                                                                                                                                                                                                                                                                                                                                                                                                                                                                                                                                                                                                                                                                                                                                                                                                                                                                                                                                                                                                                                                                                                                                                                                                                                                                                                                                                                    |
|---------------------------------|--------------------------------------------------------------------------------------------------------------------------------------------------------------------------------------------------------------------------------------------------------------------------------------------------------------------------------------------------------------------------------------------------------------------------------------------------------------------------------------------------------------------------------------------------------------------------------------------------------------------------------------------------------------------------------------------------------------------------------------------------------------------------------------------------------------------------------------------------------------------------------------------------------------------------------------------------------------------------------------------------------------------------------------------------------------------------------------------------------------------------------------------------------------------------------------------------------------------------------------------------------------------------------------------------------------------------------------------------------------------------------------------------------------------------------------------------------------------------------------------------------------------------------------------------------------------------------------------------------------------------------------------------------------------------------------------------------------------------------------------------------------------|
| Journal:                        | <i>BMJ Open</i>                                                                                                                                                                                                                                                                                                                                                                                                                                                                                                                                                                                                                                                                                                                                                                                                                                                                                                                                                                                                                                                                                                                                                                                                                                                                                                                                                                                                                                                                                                                                                                                                                                                                                                                                                    |
| Manuscript ID                   | bmjopen-2022-060985.R1                                                                                                                                                                                                                                                                                                                                                                                                                                                                                                                                                                                                                                                                                                                                                                                                                                                                                                                                                                                                                                                                                                                                                                                                                                                                                                                                                                                                                                                                                                                                                                                                                                                                                                                                             |
| Article Type:                   | Protocol                                                                                                                                                                                                                                                                                                                                                                                                                                                                                                                                                                                                                                                                                                                                                                                                                                                                                                                                                                                                                                                                                                                                                                                                                                                                                                                                                                                                                                                                                                                                                                                                                                                                                                                                                           |
| Date Submitted by the Author:   | 31-May-2022                                                                                                                                                                                                                                                                                                                                                                                                                                                                                                                                                                                                                                                                                                                                                                                                                                                                                                                                                                                                                                                                                                                                                                                                                                                                                                                                                                                                                                                                                                                                                                                                                                                                                                                                                        |
| Complete List of Authors:       | Marambire, Edson; Biomedical Research and Training Institute, Banze, Denise; Instituto Nacional de Saúde Mfinanga, Alfred; Mbeya Medical Research Centre Mutsvangwa, Junior; Biomedical Research and Training Institute Mbunda, Theodora ; NIMR-Mbeya Medical Research Programme Ntinginya, Nyanda; 6. National Institute of Medical Research-Mbeya Medical Research Centre Celso, Khosa; Instituto Nacional de Saúde Kallenius, Gunilla; Karolinska Institutet Calderwood, Claire J.; London School of Hygiene and Tropical Medicine Faculty of Infectious and Tropical Diseases Geldmacher, Christof; University Hospital, Division of Infectious Diseases and Tropical Medicine, LMU Munich ; German Center for Infection Research, Partner site Munich Held, Kathrin; University Hospital, Division of Infectious and Tropical Medicine, LMU Munich ; German Center for Infection Research, Partner site Munich Appalarowthu, Tejaswi; University Hospital, Division of Infectious Diseases and Tropical Medicine, LMU Munich; German Center for Infection Research, Partner site Munich Rieß, Friedrich; University Hospital, Division of Infectious Diseases and Tropical Medicine, LMU Munich; German Center for Infection Research, Partner site Munich Panzner, Ursula; University Hospital, Division of Infectious Diseases and Tropical Medicine, LMU Munich; German Center for Infection Research, Partner site Munich Heinrich, Norbert; University Hospital, Division of Infectious Diseases and Tropical Medicine, LMU Munich; German Center for Infection Research, Partner site Munich Kranzer, Katharina; London School of Hygiene and Tropical Medicine Faculty of Infectious and Tropical Diseases; Biomedical Research and Training Institute |
| <b>Primary Subject Heading</b>: | Respiratory medicine                                                                                                                                                                                                                                                                                                                                                                                                                                                                                                                                                                                                                                                                                                                                                                                                                                                                                                                                                                                                                                                                                                                                                                                                                                                                                                                                                                                                                                                                                                                                                                                                                                                                                                                                               |
| Secondary Subject Heading:      | Diagnostics, Infectious diseases                                                                                                                                                                                                                                                                                                                                                                                                                                                                                                                                                                                                                                                                                                                                                                                                                                                                                                                                                                                                                                                                                                                                                                                                                                                                                                                                                                                                                                                                                                                                                                                                                                                                                                                                   |

1  
2  
3  
4  
5  
6  
7  
8  
9  
10  
11  
12  
13  
14  
15  
16  
17  
18  
19  
20  
21  
22  
23  
24  
25  
26  
27  
28  
29  
30  
31  
32  
33  
34  
35  
36  
37  
38  
39  
40  
41  
42  
43  
44  
45  
46  
47  
48  
49  
50  
51  
52  
53  
54  
55  
56  
57  
58  
59  
60

|           |                                                                                                                                 |
|-----------|---------------------------------------------------------------------------------------------------------------------------------|
| Keywords: | Tuberculosis < INFECTIOUS DISEASES, Diagnostic microbiology < INFECTIOUS DISEASES, RESPIRATORY MEDICINE (see Thoracic Medicine) |
|           |                                                                                                                                 |

SCHOLARONE™  
Manuscripts



1  
2  
3 1 **Early risk assessment in pediatric and adult household contacts of confirmed**  
4  
5 2 **tuberculosis cases by novel diagnostic tests (ERASE-TB): protocol for a**  
6  
7 3 **prospective, non-interventional, longitudinal, multi-country cohort study**  
8  
9 4

10 5 Edson Tawanda Marambire<sup>1\*</sup>, Denise Banze<sup>2§</sup>, Alfred Mfinanga<sup>3§</sup>, Junior Mutsvangwa<sup>1</sup>, Theodora  
11 6 Mbunda<sup>3</sup>, Elias N. Nyanda<sup>3</sup>, Khosa Celso<sup>2</sup>, Gunilla Kallenius<sup>4</sup>, Claire J. Calderwood<sup>5</sup>, Christof  
12 7 Geldmacher<sup>6,7</sup>, Kathrin Held<sup>6,7</sup>, Tejaswi Appalarowthu<sup>6,7</sup>, Friedrich Rieß<sup>6,7</sup>, Ursula Panzner<sup>6,7</sup>, Norbert  
13 8 Heinrich<sup>6,7#</sup>, Katharina Kranzer<sup>1,5,6#</sup>, on behalf of the ERASE-TB Consortium  
14  
15  
16  
17  
18  
19  
20  
21  
22

23 10 <sup>1</sup>Biomedical Research and Training Institute, Harare, Zimbabwe

24 11 <sup>2</sup>Instituto Nacional de Saúde, Marracuene, Mozambique

25 12 <sup>3</sup>National Institute for Medical Research - Mbeya Medical Research Centre, Mbeya, Tanzania

26 13 <sup>4</sup>Karolinska Institute, Stockholm, Sweden

27 14 <sup>5</sup>Faculty of Infectious and Tropical Diseases and Tuberculosis Centre, London School of Hygiene &  
28 15 Tropical Medicine, London, UK

29 16 <sup>6</sup>Division of Infectious Diseases and Tropical Medicine, University Hospital, LMU Munich, Munich,  
30 17 Germany

31 18 <sup>7</sup>German Center for Infection Research (DZIF), Partner site Munich, Munich, Germany  
32  
33  
34  
35  
36  
37  
38  
39  
40  
41

42 20 \*Corresponding author: Edson Tawanda Marambire; 8 Rose Avenue, Belgravia, Harare, Zimbabwe; e-  
43 21 mail: edsonmarambire@gmail.com; phone: +263772286311  
44  
45  
46  
47  
48  
49  
50  
51  
52  
53  
54  
55

56 23 § Contributed equally

57 24 # Contributed equally  
58  
59  
60

52 26 Word count: 3,668

56 28 **Keywords:** *Mycobacterium tuberculosis*, diagnostics, cohort study, household contacts, WHO  
57  
58 29 END TB strategy, ERASE-TB

## 30 **ABSTRACT**

### 31 **Introduction**

32 The World Health Organization (WHO) End-TB Strategy calls for the development of novel  
33 diagnostics to detect tuberculosis earlier and more accurately. Better diagnostics, together with  
34 tools to predict disease progression are critical for achieving WHO END-TB targets. The Early  
35 Risk Assessment in TB contactS by new diagnostic tEsts (ERASE-TB) study aims to evaluate  
36 novel diagnostics and testing algorithms for early tuberculosis diagnosis and accurate  
37 prediction of disease progression among household contacts exposed to confirmed index  
38 cases in Mozambique, Tanzania and Zimbabwe.

### 40 **Methods and analysis**

41 A total of 2,100 household contacts (HHCs) (aged  $\geq 10$  years) of adults with microbiologically-  
42 confirmed pulmonary tuberculosis will be recruited and followed up at 6-month intervals for 18  
43 to 24 months. At each time-point a WHO symptom screen and digital chest-radiograph (dCXR)  
44 will be performed, and blood and urine samples collected. Individuals screening positive (WHO  
45 symptom screen or dCXR) will be requested to provide sputum for Xpert MTB/Rif Ultra. At  
46 baseline, HHCs will also be screened for HIV, diabetes (HbA1c), chronic lung disease  
47 (spirometry), hypertension and anaemia. Study outcomes will be co-prevalent tuberculosis  
48 (diagnosed at enrollment), incident tuberculosis (diagnosed during follow-up) or no  
49 tuberculosis at completion of follow up. Novel diagnostics will be validated using fresh and  
50 biobanked samples with a nested case control design. Cases are defined as HHCs diagnosed  
51 with tuberculosis (for early diagnosis) or with incident tuberculosis (for prediction of  
52 progression) and will be matched by age, sex and country to HHCs who remain healthy  
53 (controls). Statistical analyses will include assessment of diagnostic accuracy by constructing  
54 receiver operating curves and calculation of sensitivity and specificity.

### 56 **Ethics and dissemination**

1  
2  
3 57 ERASE-TB has been approved by regulatory and ethical committees in each African country  
4  
5 58 and by each partner organisation. Consent, with additional assent for participants <18 years,  
6  
7 59 is voluntary. Attestation by impartial witnesses is sought in case of illiteracy. Confidentiality of  
8  
9 60 participants is being maintained throughout. Study findings will be presented at scientific  
10  
11 61 conferences and published in peer-reviewed international journals.  
12

13  
14 62

15  
16 63 **Study registration number**

17  
18 64 NCT04781257  
19  
20  
21  
22  
23  
24  
25  
26  
27  
28  
29  
30  
31  
32  
33  
34  
35  
36  
37  
38  
39  
40  
41  
42  
43  
44  
45  
46  
47  
48  
49  
50  
51  
52  
53  
54  
55  
56  
57  
58  
59  
60

1  
2  
3 65 **Strengths**  
4

- 5 66 • Recruitment of highly infectious index cases aimed at maximising the number of  
6 tuberculosis (TB) diagnoses in the household contact (HHCs) cohort.  
7 67  
8  
9 68 • Sequencing of *Mycobacterium tuberculosis* isolates from both index cases and HHCs  
10 allows confirmation of household transmission and thus determination of timing of the  
11 transmission event; resulting in more precise estimates of new test sensitivity  
12 compared to population-based cohorts with unknown timing of infection.  
13 70  
14  
15 71  
16 72 • Large sample size across three southern African countries with high HIV prevalence;  
17 including adolescents will ensure study findings are generalisable to the clinically  
18 relevant population at high risk of TB compared to studies focused on adults only.  
19 73  
20  
21 74  
22  
23  
24  
25

26 76 **Limitations**  
27

- 28 77 • Despite the large cohort of HHCs, the number of diagnosed TB cases will be small,  
29 limiting the power of the study and sub-group analyses such as by age and HIV status.  
30 78  
31  
32 79 • Geographically limited to sub-Saharan Africa, therefore results may not be  
33 generalisable to other populations, including those with lower HIV prevalence such as  
34 in South-East Asia or the Americas.  
35 80  
36  
37 81  
38  
39  
40  
41  
42  
43  
44  
45  
46  
47  
48  
49  
50  
51  
52  
53  
54  
55  
56  
57  
58  
59  
60

## 82 INTRODUCTION

83 Tuberculosis (TB) remains a leading global public health problem, with an estimated 10 million  
84 new cases and 1.5 million deaths globally in 2020 [1]. In 2014, the World Health Assembly  
85 approved the World Health Organization (WHO) End-TB Strategy, aiming for a 90% reduction  
86 in TB incidence and 95% reduction in TB deaths by 2035 [2]. However, in 2019, three million  
87 TB cases ('the missing millions') remained undiagnosed and untreated globally, resulting in  
88 potentially avoidable morbidity, mortality and onward transmission. The Covid-19 pandemic  
89 has resulted in a large decrease in the number of people newly diagnosed with TB and  
90 reported. This has increased the diagnostic gap by a further 1.3 million, resulting in an  
91 estimated 4.2 million undiagnosed TB cases in 2020 [3]. Also, for the first time in a decade TB  
92 deaths have risen, from an estimated 1.4 million in 2019 to 1.5 million in 2020, as a result of  
93 reduced access to and provision of essential TB services including diagnostics during the  
94 Covid-19 pandemic.

95  
96 Without an efficacious and safe vaccine, early detection and containment are the main tools  
97 to interrupt transmission and successfully control TB. Similar to SARS-CoV2, asymptomatic  
98 spreading of *M.tuberculosis* and subclinical but infectious disease states are a major concern  
99 in the control of airborne infectious diseases [4]. Early and accurate identification of persons  
100 with TB, combined with identification of those at risk of progression to TB and provision of  
101 targeted preventive treatment are critical to reducing TB-associated morbidity and mortality,  
102 and preventing onward transmission.

103  
104 Currently available diagnostics such as sputum microscopy, mycobacterial culture and nucleic  
105 acid amplification tests are based on direct pathogen detection, thus requiring a high  
106 mycobacterial load; they therefore predominately target advanced TB when onward  
107 transmission and significant lung damage has occurred [5,6]. Further, for many patients with  
108 minimal or no symptoms, expectoration of high-quality sputum specimens remains

1  
2  
3 109 challenging, limiting the accuracy of sputum-based tests. The same holds true for young  
4  
5 110 children and people living with HIV.  
6

7 111  
8  
9 112 The **Early Risk Assessment in TB Contacts by new diagnostic tests** (ERASE-TB) study aims  
10  
11 113 to fill this diagnostic gap by evaluating new sputum and non-sputum-based TB diagnostics for  
12  
13 114 early TB detection (before onward transmission occurs), as well as tools for more accurate  
14  
15 115 prediction of TB progression to allow for targeted preventive therapy.  
16  
17

18 116

## 19 20 117 **METHODS AND ANALYSES**

### 21 22 118 **Study objectives**

23  
24 119 ERASE-TB's primary objectives are (I) to determine the sensitivity and specificity of novel  
25  
26 120 diagnostics to detect TB, in particular asymptomatic or minimally symptomatic TB; (II) to  
27  
28 121 evaluate novel diagnostics for detection of likely TB progression; and (III) to enhance the  
29  
30 122 performance of novel diagnostics by simulating testing algorithms coupled with individual risk  
31  
32 123 estimates from a mathematical model. The secondary objectives are (I) to determine the TB  
33  
34 124 prevalence among household contacts (HHCs) of infectious TB index cases (ICs) at baseline  
35  
36 125 and during a 18-24 months follow-up; (II) to establish a biorepository of cryopreserved  
37  
38 126 specimens from HHCs for future development and validation of diagnostic tests; and (III) to  
39  
40 127 assess the association of selected chronic disease conditions and TB among HHCs.  
41  
42

43 128

### 44 45 129 **Study endpoints**

46  
47 130 The study's primary endpoints are the presence or development of TB among HHCs with the  
48  
49 131 following possible scenarios of (I) prevalent symptomatic TB at baseline, (II) incident TB during  
50  
51 132 follow-up, and (III) remained healthy until study completion. An endpoint review committee will  
52  
53 133 review the data and case classification before finalization.  
54

55  
56 134

57  
58 135 Through the sequencing of *Mycobacterium tuberculosis* (*Mtb*) isolates, cases of co-prevalent  
59  
60 136 or incident TB will be classified either as secondary, infected by the source case – the timepoint

1  
2  
3 137 of infection will be known; or as infected by another, unknown source of infection, with an  
4  
5 138 unknown timepoint of infection.  
6

7 139

## 9 140 **Recruitment sites**

11 141 Recruitment of ICs and HHCs at selected primary healthcare facilities and communities has  
12  
13 142 commenced in Harare, Zimbabwe in March 2021, Maputo, Mozambique in August 2021, and  
14  
15 143 Mbeya, Tanzania in September 2021. Partners of the ERASE-TB consortium are illustrated in  
16  
17 144 Figure 1. All three countries have a high TB incidence ranging from 100 to 499/100,000  
18  
19 145 population [1] and HIV prevalence among adults aged 15 years and older of 5% to 20% [7].  
20  
21 146 The African research institutions have established collaborations with their respective National  
22  
23 147 Tuberculosis Programs ensuring referral and appropriate follow-up of TB patients. Figure 2  
24  
25 148 illustrates the geographic location of research institutions, healthcare facilities where  
26  
27 149 recruitment is taking place, demographic characteristics of study populations, and estimates  
28  
29 150 on TB incidence and HIV prevalence [8–15].  
30  
31

32 151

## 34 152 **Study design**

36 153 ERASE-TB is a non-interventional, longitudinal, prospective cohort study among HHCs aged  
37  
38 154  $\geq 10$  years exposed to highly infectious pulmonary TB ICs aged  $\geq 18$  years. Eligibility criteria  
39  
40 155 are detailed in Figure 3 and the study design is shown in Figure 4. TB ICs are eligible if the  
41  
42 156 bacterial load in their sputum is at least at the “medium” level according to Xpert MTB/RIF or  
43  
44 157 Xpert MTB/RIF Ultra, and they have received less than seven daily doses of anti-TB treatment  
45  
46 158 before enrollment. This maximises the likelihood of culturing and storing *Mtb* isolates. The total  
47  
48 159 study duration will be 36 months. This includes 12-months enrollment of ICs and HHCs, and  
49  
50 160 18- to 24-months follow-ups of HHCs. Follow-up ends when a HHCs withdraws from the study,  
51  
52 161 is lost to follow-up, dies, or is diagnosed with TB and referred for treatment. Scheduled or  
53  
54 162 unscheduled unwell visits can be conducted physically and/or telephonically in case of  
55  
56 163 abnormal finding e.g. by abnormal dCXR, or when a participant feels unwell inbetween  
57  
58 164 scheduled follow-up visits.  
59  
60

165

**Procedures*****TB index cases***

Following informed consent obtained, a questionnaire is administered to collect socio-demographic information, TB risk factors, and the medical history of TB, HIV and other diseases. Two spontaneous sputum samples are obtained, of which one is for mycobacterial culturing and one for storage for performing retrospectively Molecular Bacterial Load Assay (MBLA) to quantify viable *Mtb* by 16S rRNA [6]; an alternative means to quantify expectorated bacterial load for an estimate of infectiousness. Both liquid and solid mycobacterial cultures are performed on decontaminated sputum samples, with all *Mtb* isolates stored at -80 degrees for future DNA extraction and whole genome sequencing. A questionnaire on symptom duration and TB risk factors is also administered.

177

***Household key informant***

At baseline, a household key informant (either the TB index case or one of the household contacts) is identified and asked to answer questions of a household questionnaire that collects socio-economic elements like structure of the house or flat, income and household assets, and covariates possibly associated with risk of TB infection, e.g., windows/air exchange, presence of comorbid conditions, and risk factors like the source of cooking energy, and properties of the household kitchen.

185

***Household contacts***

Informed consent is obtained from all eligible adult HHCs. For HHC <18 years of age, the guardian is asked to provide informed consent, with assent also sought from children dependent on local guidance. At baseline a questionnaire is administered collecting information on socioeconomic and demographic characteristics, past medical history of TB, HIV and other diseases, exposure risk factors, smoking and alcohol history. The physical examination includes height, weight, mid-upper arm circumference and blood pressure



1  
2  
3 193 measurement. In addition, all HHCs are offered free HIV testing according to the National  
4  
5 194 Guidelines. All people with confirmed HIV infection will have CD4 counts performed and be  
6  
7 195 referred for TB preventive therapy. Those not yet on antiretroviral therapy (ART) and those  
8  
9 196 who interrupted ART are referred for ART at local services.  
10

11 197  
12  
13 198 Point of care HbA1c (A1cCare, SD Biosensor, Gyeonggi-do, Republic of Korea) and  
14  
15 199 haemoglobin (Hemocue 301+, Hemocue, Angelholm, Sweden) tests and spirometry (including  
16  
17 200 pre- and post-bronchodilation with inhaled salbutamol) are performed at baseline or the six-  
18  
19 201 month visit. HHCs who did not take up HIV testing or other screening at baseline are offered  
20  
21 202 these tests at each study visit. Any HHCs with test results requiring treatment or further  
22  
23 203 investigations are referred for respective services.  
24

25  
26 204  
27  
28 205 HHCs are screened for TB using the WHO symptom questionnaire and a digital chest-  
29  
30 206 radiograph (dCXR), reviewed by a clinical officer. dCXRs are not performed in pregnant HHCs.  
31  
32 207 HHCs with a positive WHO symptom screening and abnormal dCXR are asked to provide  
33  
34 208 sputum samples for TB investigations i.e., for GeneXpert and mycobacterial culture. Those  
35  
36 209 with negative symptom screen and normal dCXR are asked to provide a spontaneous sputum  
37  
38 210 sample for storage (with sputum induction performed if required).  
39

40  
41 211  
42  
43 212 At baseline, urine, serum, plasma, whole blood (native, and with RNA preservation in  
44  
45 213 PAXgene® tubes [BD Biosciences, NJ, USA]) are stored. A finger-prick sample is taken and  
46  
47 214 investigated using the Xpert TB Host Response RUO Prototype cartridge (Cepheid,  
48  
49 215 Sunnyvale, CA, USA). T-cell Activation Marker Tuberculosis (TAM-TB) assay and Interferon  
50  
51 216 Gamma Release Assay (IGRA; STANDARDTM F TB-Feron FIA (IFN-gamma; SD Biosensor,  
52  
53 217 Republic of Korea), are performed on fresh venous blood. In Tanzania and Mozambique,  
54  
55 218 storage of peripheral blood mononuclear cells for later characterization of the TB-specific  
56  
57 219 immune response is also performed.  
58

59  
60 220

1  
2  
3 221 Procedures for follow-up and unwell visits are similar to those at baseline. Measurement of  
4  
5 222 HIV status, haemoglobin, HbA1c, spirometry, CD4 count and IGRA testing are not performed  
6  
7 223 at follow-up visits, unless not done previously. At the last scheduled visit all HHCs not known  
8  
9 224 to have HIV are re-offered HIV testing and a spontaneous or induced sputum sample is stored  
10  
11 225 for all participants.  
12

13  
14 226

15  
16 227 ***Household contacts screening positive for TB symptoms and/or with a DCXR***  
17  
18 228 ***suggestive of TB***

19  
20 229 HHCs screening positive for symptoms and/or those with DCXRs suggestive of TB are asked  
21  
22 230 for a sputum sample, which is investigated using Xpert MTB/RIF Ultra (Cepheid). If this sample  
23  
24 231 is positive for *Mtb* (including a trace result), a minimum of two additional sputum samples are  
25  
26 232 investigated, following decontamination, with Xpert MTB/RIF Ultra, solid and liquid culture.  
27  
28 233 Isolates stored from these cultures will be sequenced for matching with the IC isolates in order  
29  
30 234 to verify intra-household transmission. Sputum induction is performed for those unable to  
31  
32 235 provide a spontaneous sputum sample. HHCs with microbiologically confirmed TB are referred  
33  
34 236 for TB treatment to the National TB Programme.  
35

36  
37 237

38  
39 238 ***Patient and public involvement***

40  
41 239 The ERASE-TB study sites have established Community Advisory Boards, which are voices  
42  
43 240 of communities, people affected, and study participants, providing a strategic link between the  
44  
45 241 communities and the study team. Community Advisory Boards meet regularly and provide  
46  
47 242 feedback on design, procedures and conduct of the study. They will also be closely involved  
48  
49 243 in the dissemination of study results. In addition to the Community Advisory Boards, each study  
50  
51 244 site conducts community engagement activities focused on young people with the aim to foster  
52  
53 245 interest in science and research, specifically in the field of respiratory diseases/illness. This  
54  
55 246 includes close partnership with schools and universities. Furthermore, planned qualitative  
56  
57 247 research will specifically aim to understand the perceptions of HHCs with regards to TB  
58  
59 248 diagnostics and screening.  
60

1  
2  
3 2494  
5 **250 Sample size**

6  
7 251 An estimated 800 to 900 TB-confirmed ICs are required for the subsequent enrollment of an  
8  
9 252 anticipated 2,100 HHCs, i.e., 700 HHCs per country. Loss to follow-up of HHCs is estimated  
10  
11 253 to be 10%. A total of 64 HHCs (3%) are estimated to be diagnosed with TB during the study  
12  
13 254 period, based on previous active case finding studies among HHCs [16]. Validation for  
14  
15 255 subclinical and early TB will include incident (n=49) and co-prevalent TB cases (n=15).  
16  
17 256 Validation for detection of incipient *M.tb* infection will include samples of participants with  
18  
19 257 incident TB (n=49) matched 1:4 to samples of participants without TB (n=196). For tests  
20  
21 258 diagnosing incipient *M.tb* infection sensitivities of 73% and 82% would be detected with a  
22  
23 259 precision of 59-85% and 68-91% respectively. For specificities of 92% and 94% the confidence  
24  
25 260 intervals would be 87-95% and 90-97%.

26  
27  
28 26129  
30 **262 Novel test candidates**

31  
32 263 A range of novel test candidates targeted at pathogen detection or identification of host  
33  
34 264 responses to *Mtb* are being applied, either in real-time (for all participants) or retrospectively  
35  
36 265 (in a case-control design). Whilst a number of novel test candidates have been pre-specified,  
37  
38 266 the ERASE-TB biobanking processes allow for addition of further candidate tests to be  
39  
40 267 evaluated on stored samples as they become available.

41  
42  
43 268

44  
45 269 DCXRs offer good sensitivity for diagnosis of pulmonary TB. However, high inter- and intra-  
46  
47 270 investigator variability, and lack of trained interpreters present a barrier to implementation in  
48  
49 271 many high-TB burden settings. Computer-aided interpretation systems, such as CAD4TB  
50  
51 272 (Delft Imaging, Hertogenbosch, Netherlands) and qXR (Qure.ai, India) may increase image-  
52  
53 273 reading capacity, with good performance, and serve, therefore, as a systematic screening tool  
54  
55 274 to identify individuals in need of confirmatory TB tests [17,18].

56  
57  
58 275  
59  
60

1  
2  
3 276 Xpert MTB/RIF Ultra is a nucleic acid amplification test for *Mtb* with a lower limit of detection  
4  
5 277 compared to the previous Xpert MTB/RIF generation, and, therefore, conferring higher  
6  
7 278 sensitivity in paucibacillary specimens. This, however, comes at the expense of specificity,  
8  
9 279 particularly in high TB incidence settings, resulting in 'false positives' [19]. WHO guidelines  
10  
11 280 recommend Xpert MTB/RIF Ultra for TB diagnosis among adults and children acknowledging  
12  
13 281 that further evaluation, particularly of the role of Xpert MTB/RIF Ultra for TB screening, is  
14  
15 282 needed [20,21].  
16

17  
18 283  
19  
20 284 FLOW-TB is an advanced enzyme-linked immunosorbent assay for the detection of *Mtb*  
21  
22 285 lipoarabinomannan (a mycobacterial cell wall component) in urinary specimens with results  
23  
24 286 available within 65 minutes [22].  
25

26 287  
27  
28 288 The T-cell activation marker-TB assay (TAM-TB) detects *Mtb*-specific CD4 T-cells through *in-*  
29  
30 289 *vitro* antigen stimulation with *Mtb*-derived peptides, i.e., from ESAT-6 and CFP-10, followed by  
31  
32 290 flow cytometry. TAM-TB discriminated latent *Mtb* infection from TB in freshly collected blood  
33  
34 291 with 83% sensitivity and 96-98% specificity in previous studies. Further, TAM-TB may detect  
35  
36 292 early TB disease progression up to 9 months prior to the identification of *Mtb* in sputum [23–  
37  
38 293 25].  
39

40  
41 294  
42  
43 295 Multiple transcriptomic signatures, capturing the host response to TB, have been described as  
44  
45 296 promising candidate tests for earlier TB diagnosis (up to two years before microbiological  
46  
47 297 diagnosis). An individual patient data meta-analysis suggested equivalent performance of  
48  
49 298 eight signatures, with 25-40% sensitivity and 92-95% specificity 0-24 months before TB  
50  
51 299 diagnosis. Diagnostic accuracy of each signature improved as the interval between testing and  
52  
53 300 microbiological TB diagnosis shortened [26]. Several signatures have been developed into  
54  
55 301 polymerase chain reaction (PCR)-based assays to facilitate real-time implementation: the  
56  
57 302 recent CORTIS trial reported sensitivity of 48% and specificity of 75% for incipient TB for the  
58  
59 303 RISK-11 signature [27]. Cepheid have developed a 3-transcript TB score into a fully automated

1  
2  
3 304 in-cartridge PCR assay performed on finger-prick blood using the Xpert platform (Xpert TB  
4  
5 305 Host Response RUO Prototype cartridge). This cartridge will be evaluated using freshly  
6  
7 306 collected specimens in ERASE-TB; storage of RNA-stabilised blood samples also allows for  
8  
9 307 retrospective evaluation of additional transcriptomic signatures in our cohort [28,29]  
10

11 308

12  
13 309 An alternative approach to capture the host response to TB is through protein-based biomarker  
14  
15 310 signatures. Candidate tests in this category include a serum- or plasma-based multiplex assay  
16  
17 311 assessing 13 protein biomarkers (CRP, procalcitonin[30], sTREM-1[31,32], angiopoietin-  
18  
19 312 2[33,34], interleukin-6[35], TRAIL[36] and IP-10[37]) that is being developed by the London  
20  
21 313 School of Hygiene and Tropical Medicine; in addition, a seven biomarker signature is under  
22  
23 314 development as a point-of-care test for TB diagnosis, with 94% sensitivity and 73% specificity  
24  
25 315 detected in previous work [38].  
26  
27

28 316

### 30 317 **Statistical analyses**

31  
32 318 Baseline characteristics and analytical data will be summarized using descriptive statistics  
33  
34 319 inclusive of mean, median, range, standard deviation, and absolute as well as relative  
35  
36 320 frequencies depending on the nature of data. A logistic regression model will be used to identify  
37  
38 321 characteristics of TB among ICs, households and HHCs that are predictive of incident TB.  
39  
40 322 From the study database, we will simulate algorithms of different tests to obtain the testing  
41  
42 323 combination with the best accuracy. We will couple tests with a mathematical model that  
43  
44 324 quantifies the risk of infection and/or disease to enhance predictive performance. The reporting  
45  
46 325 of the development of the prediction model will follow the Transparent Reporting of a  
47  
48 326 multivariable prediction model for Individual Prognosis Or Diagnosis (TRIPOD) Initiative [39].  
49

50 327

51  
52  
53 328 The validation of novel diagnostic tests for detecting TB will be analysed as a 1:4 matched  
54  
55 329 nested case-control study with HHCs diagnosed with TB at baseline and during follow-up  
56  
57 330 serving as cases, and HHCs who do not develop TB during follow-up as controls; controls will  
58  
59 331 be matched for site, age, sex, HIV status and other risk factors for developing TB. Sensitivity

1  
2  
3 332 and specificity of novel tests will be determined using pre-existing positive/negative cut-offs  
4  
5 333 where these exist [40]; and receiver operating curves (ROC) constructed with area under the  
6  
7 334 ROC curve calculated. For tests aiming to identify individuals at high risk of TB in the future,  
8  
9 335 only HHCs who are diagnosed with TB during follow-up will serve as cases (i.e. those  
10  
11 336 diagnosed with TB at baseline will be excluded). Stored samples from all timepoints will be  
12  
13 337 retrieved and diagnostic accuracy (i.e. sensitivity and specificity) of the novel test determined  
14  
15 338 at different time-points before TB diagnosis. The decision of assigning the “active TB”  
16  
17 339 endpoints to participants will be blinded from the new test results to avoid inclusion bias.  
18  
19  
20 340

### 21 341 **Data management**

22  
23  
24 342 All source data will be kept confidential in secured locations with restricted access by  
25  
26 343 authorized personnel only inclusive of monitors, auditors and reviewers of ethical and  
27  
28 344 regulatory committees in line with applicable data privacy regulations. Each participant is  
29  
30 345 asked to consent to this handling of the data, and is assigned a pseudonymous identification  
31  
32 346 number that is used throughout the study on all source data.  
33  
34  
35 347

36  
37 348 Accurate documentation of paper-based and electronic source data, e.g., original records and  
38  
39 349 certified copies of original records, progress notes, screening logs, and recorded data from  
40  
41 350 automated instruments, will be maintained. The pseudonymized clinical data captured on  
42  
43 351 paper-based Case Report Forms will be entered at the sites into a database using the web-  
44  
45 352 based Clinical Data Management System of OpenClinica (OpenClinica LLC, Waltham, MA,  
46  
47 353 USA). The study specific database has been built, maintained and hosted by the LMU Klinikum  
48  
49 354 on a centralized secure server. Data modifications and necessary corrections performed in the  
50  
51 355 database also within the context of double data entry will be documented and tracked in audit  
52  
53 356 trails. Data quality and plausibility are assured by a series of pre-programmed edit and range  
54  
55 357 checks in OpenClinica. Further validation checks are programmed in Stata (Statacorp, College  
56  
57 358 Station, TX, USA) with extracts of the database and electronically received data, e.g.,  
58  
59 359 spirometry, dCXR and laboratory, will be integrated into analyses of datasets.  
60

360

**361 Monitoring**

362 Assigned study monitors will visit the sites at regular intervals physically and/or virtually in  
363 addition to frequent day-to-day communication. Close follow-up on all study-related aspects  
364 will be performed to ascertain compliance with standards of Good Clinical Practice, the  
365 Declaration of Helsinki, and other local and national regulatory guidelines inclusive of  
366 guidelines for infection prevention and control of airborne-transmitted diseases, e.g., social  
367 distancing in well-ventilated spaces, and wearing of personal protective equipment. In  
368 particular, monitors that support designated study personnel are responsible to verify (I)  
369 adequacy of the study personnels' qualifications and facilities, (II) accuracy of informed  
370 consent procedures and patient eligibility, (III) adherence to the study protocol, (IV) protection  
371 of rights and well-being of participants, (V) adherence to infection prevention and control  
372 measures (VI) accuracy and completeness of study documents and other study-related  
373 records, and (VII) maintenance of source documents.

374

**375 Ethics and dissemination**

376 The study protocol and informed consent/assent documents have been approved by regulatory  
377 and ethical committees of the participating institutions [Medical Research Council in Zimbabwe  
378 (MRCZ/A/2618), the National Health Research Ethics Committee in Tanzania (TMDA-  
379 WEB0021/CTR/0004/03), the National Bioethics Committee for Health in Mozambique  
380 (541/CNBS/21), and the ethical committees of London School of Hygiene & Tropical Medicine,  
381 United Kingdom (22522-2), and the medical faculty of the Ludwig-Maximilians-Universität  
382 München, Germany (20-0771)].

383

384 Adult ICs and HHCs are asked for written informed consent prior to their participation.  
385 Underage HHCs are asked for assent in addition to obtaining the consent of their legal  
386 guardians/parents; with ages for assent depending on local guidance. In case of illiteracy, the  
387 participant is asked to give its consent by fingerprint while an adult impartial, literate witness



1  
2  
3 388 present during the entire consent procedure signs the consent on behalf. All participants have  
4  
5 389 the right to withdraw from the study at any time. Findings derived from ERASE-TB will be  
6  
7 390 presented at scientific conferences, and published in peer-reviewed international journals.  
8  
9 391

10 391

### 11 392 **Current study status**

12  
13 393 The recruitment of ICs and HHCs is in progress in Zimbabwe, Mozambique and Tanzania  
14  
15 394 since March, August and September 2021, respectively. The follow-up of HHCs is anticipated  
16  
17 395 to be completed in March, August and September 2023 in Zimbabwe, Mozambique and  
18  
19 396 Tanzania, respectively; laboratory analyses are estimated to be performed by December 2024.  
20  
21

22 397

### 23 398 **Author contributions**

24  
25  
26 399 The study proposal and protocol were written by NH, KK with scientific input from CK, TM, CG,  
27  
28 400 JM. ETM, UP, DB, AM wrote the initial manuscript with scientific input on the database and  
29  
30 401 data management section from FR, TA. NH, KK critically reviewed the initial draft of the  
31  
32 402 manuscript. KH, GK, CJC, ENN, TA, provided critical feedback on the manuscript. All authors  
33  
34 403 have read and approved the final version of the manuscript.  
35  
36

37 404

### 38 405 **Funding statement**

39  
40  
41 406 ERASE-TB is part of the EDCTP2 programme supported by the European Union (grant  
42  
43 407 number RIA2018D-2508-ERASE-TB), the German Center for Infection Research (DZIF) grant  
44  
45 408 number: 02.710 and the Swedish Research Council (220-23602). CJC is funded by the  
46  
47 409 Wellcome Trust (203905/Z/16/Z). Cepheid, Inc., and SD Biosensor provided test kits and  
48  
49 410 analyzers at no cost to the Consortium.  
50  
51

52 411

### 53 412 **Acknowledgments**

54  
55  
56 413 We are grateful to the study personnel from the Biomedical Research and Training Institute  
57  
58 414 and the Zvitambo Research Institute, Zimbabwe, the Instituto Nacional de Saúde,  
59  
60 415 Mozambique, and the National Institute for Medical Research - Mbeya Medical Research



1  
2  
3 416 Centre, Tanzania for their exceptional efforts and contributions, which made this research  
4  
5 417 possible.

6  
7 418

8  
9 419 **Consortium authorship**

10  
11 420 The following are members of the ERASE-TB consortium: Anna Shepherd<sup>a</sup>, Hazel M Dockrell<sup>a</sup>,  
12  
13 421 Judith Bruchfeld<sup>b</sup>, Christopher Sundling<sup>b</sup>, Charles Sandy<sup>c</sup>, Mishelle Mugava<sup>c</sup>, Tsitsi  
14  
15 422 Bandason<sup>c</sup>, Martha Chipinduro<sup>c</sup>, Kuda Mutasa<sup>d</sup>, Sandra Rukobo<sup>d</sup>, Lwitiho Sudi<sup>e</sup>, Antelmo  
16  
17 423 Haule<sup>e</sup>, Emmanuel Sichone<sup>e</sup>, Paschal Qwaray<sup>e</sup>, Bariki Mtafya<sup>e</sup>, Harrieth Mwambola<sup>e</sup>, Lilian  
18  
19 424 Minja<sup>e</sup>, Issa Sabi<sup>e</sup>, Peter Edwin<sup>e</sup>, Dogo Ngalison<sup>e</sup>, Stella Luswema<sup>e</sup>, Willyhelmina Olomi<sup>e</sup>,  
20  
21 425 Doreen Pamba<sup>e</sup>, Simeon Mwanyonga<sup>e</sup>, Celina Nhamuave<sup>f</sup>, António Machiana<sup>f</sup>, Carla Madeira<sup>f</sup>,  
22  
23 426 Emelva Manhiça<sup>f</sup>, Nádia Siteo<sup>f</sup>, Jorge Ribeiro<sup>f</sup>, Christof Geldmacher<sup>g</sup>, Andrea Rachow<sup>g</sup>, Olena  
24  
25 427 Ivanova<sup>g</sup>, Laura Olbrich<sup>g</sup>, Elmar Saathoff<sup>g</sup>, Michael Hoelscher<sup>g</sup>.

26  
27  
28 428

29  
30 429 <sup>a</sup>Faculty of Infectious and Tropical Diseases, Department of Infection Biology, London School  
31  
32 430 of Hygiene & Tropical Medicine, London, UK

33  
34 431 <sup>b</sup>Karolinska Institute, Stockholm, Sweden

35  
36 432 <sup>c</sup>Biomedical Research and Training Institute, Harare, Zimbabwe

37  
38 433 <sup>d</sup>Zvitambo Research Institute, Harare, Zimbabwe

39  
40 434 <sup>e</sup>National Institute for Medical Research - Mbeya Medical Research Centre, Mbeya, Tanzania

41  
42 435 <sup>f</sup>Instituto Nacional de Saúde, Marracuene, Mozambique

43  
44 436 <sup>g</sup>Division of Infectious Diseases and Tropical Medicine, University Hospital, LMU Munich,  
45  
46 437 Munich, Germany

47  
48  
49 438

50  
51 439 **Competing interests statement**

52  
53 440 None declared.

54  
55 441

56  
57 442 **Disclaimer**

58  
59 443 Not applicable.

1  
2  
3 444 **References**  
4 445

- 5 446 1 Global tuberculosis report 2021.  
6 447 <https://www.who.int/publications/i/item/9789240037021> (accessed 28 Oct 2021).  
7 448 2 The end TB STRategy global strategy and targets for tuberculosis prevention, care  
8 449 and control after 2015 a. Published Online First:  
9 450 2014.[https://www.who.int/tb/strategy/End\\_TB\\_Strategy.pdf](https://www.who.int/tb/strategy/End_TB_Strategy.pdf) (accessed 28 Oct 2021).  
10 451 3 WHO. Global Tuberculosis Report.  
11 452 2020.<https://www.who.int/publications/i/item/9789240013131> (accessed 31 Jul 2021).  
12 453 4 Snider B, Patel B, McBean E. Asymptomatic Cases, the Hidden Challenge in  
13 454 Predicting COVID-19 Caseload Increases. *Infect Dis Reports 2021, Vol 13, Pages*  
14 455 *340-347 2021*;13:340–7. doi:10.3390/IDR13020033  
15 456 5 TB Disease - Symptoms, treatment & prevention - TBFacts. [https://tbfacts.org/tb-](https://tbfacts.org/tb-disease/)  
16 457 [disease/](https://tbfacts.org/tb-disease/) (accessed 28 Aug 2021).  
17 458 6 Honeyborne I, McHugh TD, Phillips PPJ, *et al*. Molecular Bacterial Load Assay, a  
18 459 Culture-Free Biomarker for Rapid and Accurate Quantification of Sputum  
19 460 Mycobacterium tuberculosis Bacillary Load during Treatment. *J Clin Microbiol*  
20 461 2011;49:3905. doi:10.1128/JCM.00547-11  
21 462 7 UNAIDS. UNAIDS Global AIDS Update. 2021.  
22 463 [https://www.unaids.org/sites/default/files/media\\_asset/2021-global-aids-update\\_en.pdf](https://www.unaids.org/sites/default/files/media_asset/2021-global-aids-update_en.pdf)  
23 464 (accessed 28 Oct 2021).  
24 465 8 ZIMBABWE POPULATION CENSUS 2012 WOMEN AND MEN PROFILE SUMMARY  
25 466 REPORT. Published Online First: 2016.[https://www.zimstat.co.zw/wp-](https://www.zimstat.co.zw/wp-content/uploads/publications/Social/Gender/Women-and-Men-Report-2012.pdf)  
26 467 [content/uploads/publications/Social/Gender/Women-and-Men-Report-2012.pdf](https://www.zimstat.co.zw/wp-content/uploads/publications/Social/Gender/Women-and-Men-Report-2012.pdf)  
27 468 (accessed 15 Oct 2021).  
28 469 9 Tanzania Census 2012 - Dashboard. <http://dataforall.org/dashboard/tanzania/>  
29 470 (accessed 15 Oct 2021).  
30 471 10 ZIMBABWE POPULATION-BASED HIV IMPACT ASSESSMENT ZIMPHIA 2020 KEY  
31 472 FINDINGS. [https://phia.icap.columbia.edu/wp-content/uploads/2020/11/ZIMPHIA-](https://phia.icap.columbia.edu/wp-content/uploads/2020/11/ZIMPHIA-2020-Summary-Sheet_Web.pdf)  
32 473 [2020-Summary-Sheet\\_Web.pdf](https://phia.icap.columbia.edu/wp-content/uploads/2020/11/ZIMPHIA-2020-Summary-Sheet_Web.pdf) (accessed 3 Sep 2021).  
33 474 11 Xadrique H, Maunze A, Dade M, *et al*. IV RECENSEAMENTO GERAL DA  
34 475 POPULAÇÃO E HABITAÇÃO. 2017. [http://www.ine.gov.mz/iv-rgph-](http://www.ine.gov.mz/iv-rgph-2017/mocambique/censo-2017-brochura-dos-resultados-definitivos-do-iv-rgph-nacional.pdf)  
35 476 [2017/mocambique/censo-2017-brochura-dos-resultados-definitivos-do-iv-rgph-](http://www.ine.gov.mz/iv-rgph-2017/mocambique/censo-2017-brochura-dos-resultados-definitivos-do-iv-rgph-nacional.pdf)  
36 477 [nacional.pdf](http://www.ine.gov.mz/iv-rgph-2017/mocambique/censo-2017-brochura-dos-resultados-definitivos-do-iv-rgph-nacional.pdf) (accessed 31 Jul 2021).  
37 478 12 Population of Cities in Zimbabwe (2021).  
38 479 <https://worldpopulationreview.com/countries/cities/zimbabwe> (accessed 3 Aug 2021).  
39 480 13 World atlas. <https://knoema.com/atlas/United-Republic-of-Tanzania>. (accessed 26 Jul  
40 481 2021).  
41 482 14 Prevalence of HIV, total (% of population ages 15-49) | Data.  
42 483 <https://data.worldbank.org/indicator/SH.DYN.AIDS.ZS?locations=ZW> (accessed 3 Aug  
43 484 2021).  
44 485 15 Incidence of tuberculosis (per 100,000 people) - Zimbabwe | Data.  
45 486 <https://data.worldbank.org/indicator/SH.TBS.INCD?locations> (accessed 3 Aug 2021).  
46 487 16 Fox GJ, Nhung N V., Sy DN, *et al*. Household-Contact Investigation for Detection of  
47 488 Tuberculosis in Vietnam. *N Engl J Med* 2018;378:221–9.  
48 489 doi:10.1056/NEJMOA1700209  
49 490 17 Qin ZZ, Ahmed S, Sarker MS, *et al*. Tuberculosis detection from chest x-rays for  
50 491 triaging in a high tuberculosis-burden setting: an evaluation of five artificial intelligence  
51 492 algorithms. *Lancet Digit Heal* 2021;3:e543–54. doi:10.1016/S2589-7500(21)00116-3  
52 493 18 MacPherson P, Webb EL, Kamchedzera W, *et al*. Computer-aided X-ray screening for  
53 494 tuberculosis and HIV testing among adults with cough in Malawi (the PROSPECT  
54 495 study): A randomised trial and cost-effectiveness analysis. *PLoS Med* 2021;18:1–17.  
55 496 doi:10.1371/journal.pmed.1003752  
56 497 19 Dorman S, Schumacher S, Alland D, *et al*. Xpert MTB/RIF Ultra for detection of  
57 498 Mycobacterium tuberculosis and rifampicin resistance: a prospective multicentre  
58 499 diagnostic accuracy study. *Lancet Infect Dis* 2018;18:76–84. doi:10.1016/S1473-

- 1  
2  
3 500 3099(17)30691-6  
4 501 20 WHO Meeting Report of a Technical Expert Consultation: Non-inferiority analysis of  
5 502 Xpert MTB/RIF Ultra compared to Xpert MTB/RIF. Published Online First:  
6 503 2017.<http://apps.who.int/bookorders>. (accessed 19 Oct 2021).  
7 504 21 World Health Organization. WHO consolidated guidelines on tuberculosis: Module 2:  
8 505 Screening. 2021.<https://www.who.int/publications/i/item/9789240022676> (accessed 9  
9 506 Dec 2021).  
10 507 22 Hamasur B, Bruchfeld J, van Helden P, *et al*. A sensitive urinary lipoarabinomannan  
11 508 test for tuberculosis. *PLoS One* 2015;**10**. doi:10.1371/JOURNAL.PONE.0123457  
12 509 23 Portevin D, Moukambi F, Clowes P, *et al*. Assessment of the novel T-cell activation  
13 510 marker-tuberculosis assay for diagnosis of active tuberculosis in children: a  
14 511 prospective proof-of-concept study. *Lancet Infect Dis* 2014;**14**:931–8.  
15 512 doi:10.1016/S1473-3099(14)70884-9  
16 513 24 Schuetz A, Haule A, Reither K, *et al*. Monitoring CD27 expression to evaluate  
17 514 Mycobacterium tuberculosis activity in HIV-1 infected individuals in vivo. *PLoS One*  
18 515 2011;**6**. doi:10.1371/JOURNAL.PONE.0027284  
19 516 25 Ahmed MIM, Ntinginya NE, Kibiki G, *et al*. Phenotypic Changes on Mycobacterium  
20 517 Tuberculosis-Specific CD4 T Cells as Surrogate Markers for Tuberculosis Treatment  
21 518 Efficacy. *Front Immunol* 2018;**9**:2247. doi:10.3389/FIMMU.2018.02247/BIBTEX  
22 519 26 Gupta RK, Turner CT, Venturini C, *et al*. Concise whole blood transcriptional  
23 520 signatures for incipient tuberculosis: a systematic review and patient-level pooled  
24 521 meta-analysis. *Lancet Respir Med* 2020;**8**:395–406.  
25 522 doi:<http://dx.doi.org/10.1016/S2213-2600%2819%2930282-6>  
26 523 27 Scriba TJ, Fiore-Gartland A, Penn-Nicholson A, *et al*. Biomarker-guided tuberculosis  
27 524 preventive therapy (CORTIS): a randomised controlled trial. *Lancet Infect Dis*  
28 525 2021;**21**:354–65. doi:10.1016/S1473-3099(20)30914-2/ATTACHMENT/EB270186-  
29 526 669A-4F82-8A80-FB38FA1FB796/MMC1.PDF  
30 527 28 Warsinske H, Rao A, Moreira F, *et al*. Assessment of Validity of a Blood-Based 3-  
31 528 Gene Signature Score for Progression and Diagnosis of Tuberculosis, Disease  
32 529 Severity, and Treatment Response. *JAMA Netw open* 2018;**1**:e183779.  
33 530 doi:10.1001/JAMANETWORKOPEN.2018.3779  
34 531 29 Sweeney TE, Braviak L, Tato CM, *et al*. Genome-wide expression for diagnosis of  
35 532 pulmonary tuberculosis: a multicohort analysis. *Lancet Respir Med* 2016;**4**:213–24.  
36 533 doi:10.1016/S2213-2600(16)00048-5  
37 534 30 Mendelson F, Griesel R, Tiffin N, *et al*. C-reactive protein and procalcitonin to  
38 535 discriminate between tuberculosis, Pneumocystis jirovecii pneumonia, and bacterial  
39 536 pneumonia in HIV-infected inpatients meeting WHO criteria for seriously ill: a  
40 537 prospective cohort study. *BMC Infect Dis* 2018;**18**. doi:10.1186/S12879-018-3303-6  
41 538 31 Huang C, Lee L, Ho C, *et al*. High serum levels of procalcitonin and soluble TREM-1  
42 539 correlated with poor prognosis in pulmonary tuberculosis. *J Infect* 2014;**68**:440–7.  
43 540 doi:10.1016/J.JINF.2013.12.012  
44 541 32 Feng J, Su W, Pan S, *et al*. Role of TREM-1 in pulmonary tuberculosis patients-  
45 542 analysis of serum soluble TREM-1 levels. *Sci Rep* 2018;**8**. doi:10.1038/S41598-018-  
46 543 26478-2  
47 544 33 Kumar NP, Velayutham B, Nair D, *et al*. Angiopoietins as biomarkers of disease  
48 545 severity and bacterial burden in pulmonary tuberculosis. *Int J Tuberc Lung Dis*  
49 546 2017;**21**:93. doi:10.5588/IJTLD.16.0565  
50 547 34 Kathamuthu G, Moideen K, Baskaran D, *et al*. Tuberculous lymphadenitis is  
51 548 associated with altered levels of circulating angiogenic factors. *Int J Tuberc Lung Dis*  
52 549 2018;**22**:557–66. doi:10.5588/IJTLD.17.0609  
53 550 35 Sivo A, McKinnon L, Yende-Zuma N, *et al*. Plasma Cytokine Predictors of  
54 551 Tuberculosis Recurrence in Antiretroviral-Treated Human Immunodeficiency Virus-  
55 552 infected Individuals from Durban, South Africa. *Clin Infect Dis* 2017;**65**:819–26.  
56 553 doi:10.1093/CID/CIX357  
57 554 36 La Manna M, Orlando V, Li Donni P, *et al*. Identification of plasma biomarkers for  
58 555 discrimination between tuberculosis infection/disease and pulmonary non tuberculosis

- 1  
2  
3 556 disease. *PLoS One* 2018;**13**. doi:10.1371/JOURNAL.PONE.0192664  
4 557 37 Sivo A, McKinnon L, Yende-Zuma N, *et al*. Plasma Cytokine Predictors of  
5 558 Tuberculosis Recurrence in Antiretroviral-Treated Human Immunodeficiency Virus-  
6 559 infected Individuals from Durban, South Africa. *Clin Infect Dis* 2017;**65**:819–26.  
7 560 doi:10.1093/CID/CIX357  
8 561 38 Chegou NN, Sutherland JS, Malherbe S, *et al*. Diagnostic performance of a seven-  
9 562 marker serum protein biosignature for the diagnosis of active TB disease in African  
10 563 primary healthcare clinic attendees with signs and symptoms suggestive of TB. *Thorax*  
11 564 2016;**71**:785–94. doi:10.1136/thoraxjnl-2015-207999  
12 565 39 Collins GS, Reitsma JB, Altman DG, *et al*. Transparent reporting of a multivariable  
13 566 prediction model for individual prognosis or diagnosis (TRIPOD): The TRIPOD  
14 567 Statement. *BMC Med* 2015;**13**:1–10. doi:10.1186/S12916-014-0241-Z/TABLES/1  
15 568 40 Trevethan R. Sensitivity, Specificity, and Predictive Values: Foundations, Pliabilities,  
16 569 and Pitfalls in Research and Practice. *Front public Heal* 2017;**5**.  
17 570 doi:10.3389/FPUBH.2017.00307  
18 571 41 Agency ZS. QUALITY CONTROL MANUAL Provincial Report Harare Central Census  
19 572 Office. [https://www.zimstat.co.zw/wp-](https://www.zimstat.co.zw/wp-content/uploads/publications/Population/population/Harare.pdf)  
20 573 [content/uploads/publications/Population/population/Harare.pdf](https://www.zimstat.co.zw/wp-content/uploads/publications/Population/population/Harare.pdf) (accessed 3 Aug  
21 574 2021).  
22 575 42 Mozambique Population 2021 (Demographics, Maps, Graphs).  
23 576 <https://worldpopulationreview.com/countries/mozambique-population> (accessed 27 Jul  
24 577 2021).  
25 578 43 ZIMBABWE NATIONAL HIV/AIDS AND TUBERCULOSIS CONTROL  
26 579 PROGRAMMES. Republic of Zimbabwe NATIONAL HIV/AIDS AND TUBERCULOSIS  
27 580 CONTROL PROGRAMMES. <https://www.who.int/hiv/pub/guidelines/zimbabwe.pdf>  
28 581 (accessed 1 Sep 2021).  
29 582  
30 583  
31  
32  
33  
34  
35  
36  
37  
38  
39  
40  
41  
42  
43  
44  
45  
46  
47  
48  
49  
50  
51  
52  
53  
54  
55  
56  
57  
58  
59  
60

1  
2  
3 584 **Figure legend**

4  
5 585 **Figure 1.** The ERASE-TB consortium

6  
7 586 Abbreviations: ERASE-TB=Early Risk Assessment in TB contactS by new diagnostic tEsts

8  
9 587

10  
11 588 **Figure 2.** Location and characteristics of ERASE-TB study sites

12  
13 589 Notes: The location of each study site is indicated by a red asterix. Source data used within  
14  
15 590 this figure are taken from the references [7,8,42,43,9–15,41].

16  
17  
18 591 Abbreviations: ERASE=Early Risk Assessment in TB contactS by new diagnostic tEsts;  
19  
20 592 TB=tuberculosis; HIV=human immunodeficiency virus

21  
22 593

23  
24 594 **Figure 3.** Eligibility criteria and schedules of events for index cases and household contacts

25  
26 595 Notes: **A**=depending on the time point of study enrollment and consequently on the duration  
27  
28 596 available for follow-up, i.e. 18 or 24 months, the follow-up visit at 24 months  $\pm 30$  days may be

29  
30 597 conditional; **B**=the follow-up visit by phone may be conducted after the last scheduled follow-  
31  
32 598 up visit at 18 months  $\pm 30$  days or 24 months  $\pm 30$  days to assess whether symptoms suggestive

33  
34 599 of TB have occurred, TB diagnosis has been made or anti-TB treatment has been initiated;

35  
36 600 **C**=unwell visits by phone or on-site may be conducted between scheduled follow-up visits if a  
37  
38 601 participant presents at a recruitment healthcare facility with signs and symptoms suggestive of

39  
40 602 TB; **D**=coached spontaneous or induced sputum collection for storage at scheduled follow-up  
41  
42 603 visit at 18 months  $\pm 30$  days or 24 months  $\pm 30$  days, and for repetition of HIV testing if tested

43  
44 604 negative at baseline; **E**=coached spontaneous or induced sputum collection upon the decision  
45  
46 605 of the investigating team for testing by Xpert MTB/RIF Ultra if participant presents with signs

47  
48 606 and symptoms suggestive of TB; **F**=coached spontaneous or induced sputum collection in  
49  
50 607 case of Xpert MTB/RIF Ultra positivity or strong clinical suspicion of TB for repetition of the

51  
52 608 Xpert MTB/RIF Ultra; **G**=in case of HIV positivity to be followed by the assessment of CD4  
53  
54 609 counts; **H**=CXR to be conducted at an unscheduled on-site unwell visit upon the decision of

55  
56 610 the investigating team depending on the nature of symptoms reported, and the time elapsed  
57  
58 611 since the last CXR including its findings; **I**=not to be conducted among pregnant women;



1  
2  
3 612 **J**=stored venous blood includes 6mL EDTA blood for whole blood and plasma, 4mL serum  
4  
5 613 and 2.5mL PAXgene blood, all samples will be deep frozen for retrospective testing using new  
6  
7 614 diagnostics as described in text; **K**=in case the evaluation of symptoms of a participant unable  
8  
9 615 to present at a recruitment healthcare facility is required an unscheduled on-site or home visit  
10  
11 616 will be arranged by phone, the resolution of symptoms can alternatively be addressed by  
12  
13 617 phone; **L**=collection of PBMC at baseline and follow-up visit at 6 months  $\pm$ 30 days is optional,  
14  
15 618 thus will not be performed at each participating site and for each participant; **M**=in case the  
16  
17 619 evaluation of symptoms of a participant unable to present at a recruitment healthcare facility  
18  
19 620 is required or doubtful if required an unscheduled unwell visit by phone will be arranged, the  
20  
21 621 resolution of symptoms can alternatively be addressed by phone; **N**=spirometry and/or  
22  
23 622 diabetes (HbA1c) will be performed at scheduled follow-up visits at 6 months  $\pm$ 30 days, 12  
24  
25 623 months  $\pm$ 30 days and 18 or 24 months  $\pm$ 30 days if required or not performed at baseline,  
26  
27 624 anaemia (Hb) will be performed at baseline and scheduled follow-up visits at 6 months  $\pm$ 30  
28  
29 625 days, 12 months  $\pm$ 30 days and 18 or 24 months  $\pm$ 30 days if possible; **O**=blood pressure  
30  
31 626 measurement will be performed at baseline and scheduled follow-up visits at 6 months  $\pm$ 30  
32  
33 627 days, 12 months  $\pm$ 30 days and 18 or 24 months  $\pm$ 30 days; **P**=WGS to be performed once *Mtb*  
34  
35 628 infection is confirmed and an isolate could be recovered.

36  
37  
38  
39 629 Abbreviations: TB=tuberculosis; WHO=World Health Organization; HIV=human  
40  
41 630 immunodeficiency virus; WGS=whole genome sequencing; MBLA=molecular bacterial load  
42  
43 631 assay; CXR=chest radiograph; IGRA=interferon gamma release assay; PBMC=peripheral  
44  
45 632 blood mononuclear cell; TAM-TB=T- cell activation marker tuberculosis; MTB=*Mycobacterium*  
46  
47 633 *tuberculosis*; RIF=rifampicin, Hb=haemoglobin; HbA1c=glycated hemoglobin;  
48  
49 634 LAM=lioparabinomannan; CD4=cluster of differentiation 4

50  
51 635

#### 52 636 **Figure 4.** Study design

53  
54  
55 637 Abbreviations: HHC=household contact; TB=tuberculosis; IC=index case; WHO=World  
56  
57 638 Health Organization; CXR= chest radiograph; SS=symptom score; MTB=*Mycobacterium*  
58  
59 639 *tuberculosis*; RIF=rifampicin; pos=positive; CT=computer tomography; FU=follow-up

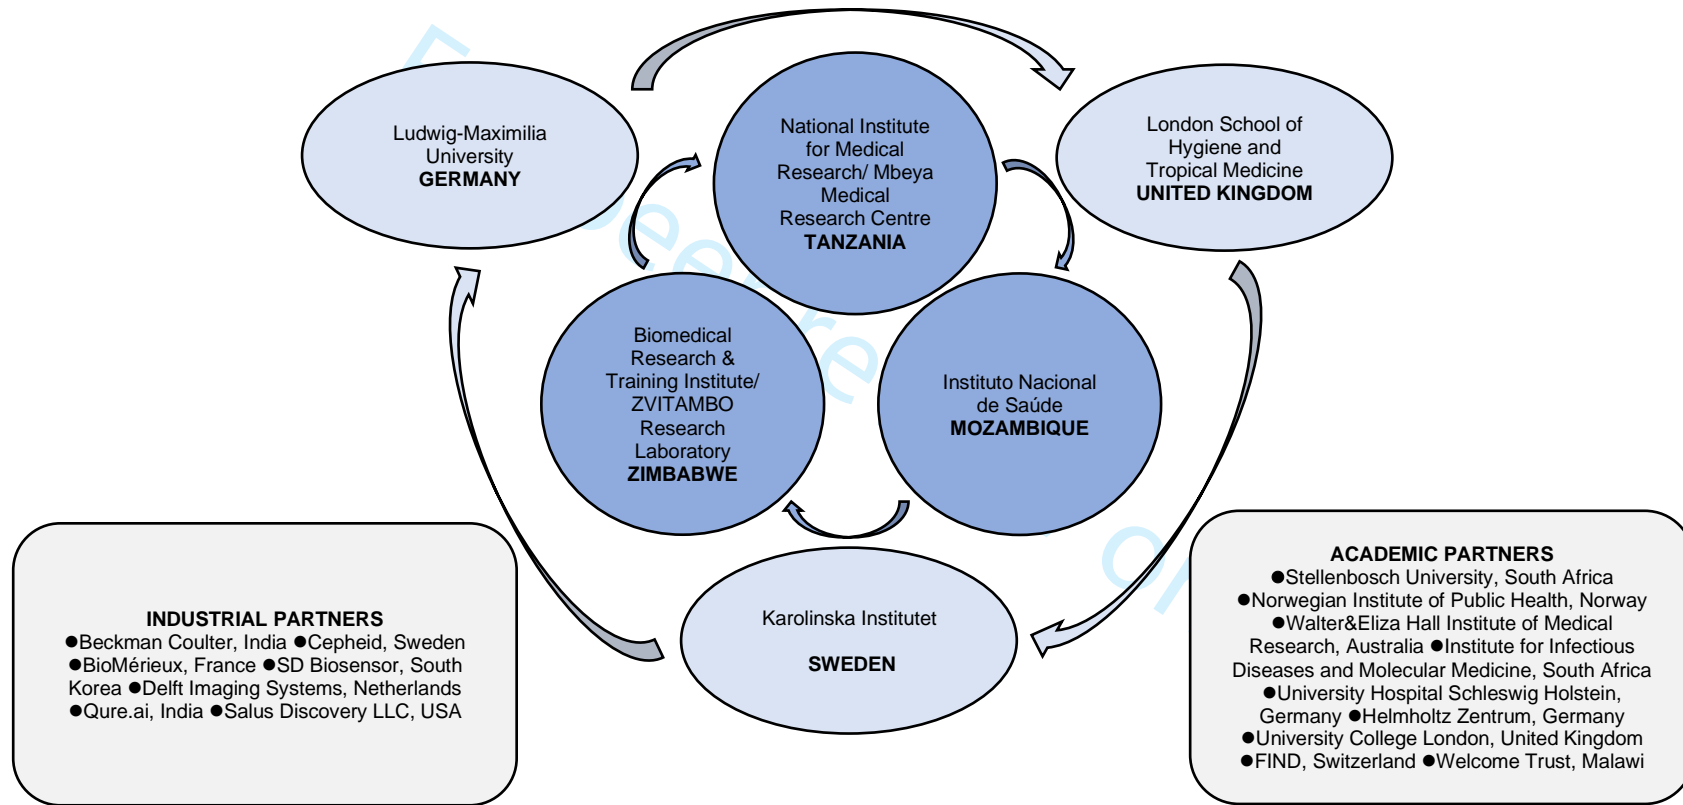

**Figure 1.** The ERASE-TB consortium



**Figure 2.** Location and characteristics of ERASE-TB study sites



**INDEX CASE**

**HOUSEHOLD CONTACT**

**INCLUSION CRITERIA**

- Aged ≥18 years
- Living with at least another person aged ≥10 years in the same household with a firm unchanged address for 6 months
- Pulmonary TB diagnosis within 4 weeks prior to enrolment
- Spontaneous sputum production
- Positive sputum smear, i.e. >+2 positivity by Ziehl-Neelsen stain or Auramine-O stain OR ≥+1 positivity on WHO symptom scale OR ≥medium positivity by GeneXpert (if no microscopy performed)
- <7 daily doses of anti-TB treatment since diagnosis
- Voluntary written informed consent obtained

**EXCLUSION CRITERIA**

- Treatment for TB within the past 30 days OR on current TB treatment OR on current preventive TB therapy (if HIV negative) at the time of enrolment

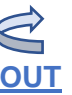

**INCLUSION CRITERIA**

- Aged ≥10 years
- Substantial exposure, i.e. spending ≥3 nights/week over the past 4 weeks in the same household as the index case,
- Voluntary written informed consent or parent/guardian consent & assent in case of minors obtained

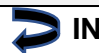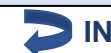

**EVENTS AT BASELINE/SCREENING VISIT**

- Administration of socio-demographic questionnaire
  - Assessment of vital signs, medical history
  - Digital CXR (if available)<sup>I</sup>
- Specimen investigations**
- Sputum: culture, storage, WGS, MBLA

**EVENTS AT BASELINE/ ±14days of SCREENING VISIT**

- Administration of socio-demographic questionnaire
  - Assessment vital signs, medical history
  - Screening for diabetes (HbA1c)<sup>N</sup>, high blood pressure<sup>O</sup>, anaemia (Hb)<sup>N</sup>, WHO TB symptoms
  - Digital CXR<sup>I</sup>, spirometry<sup>N</sup>
- Specimen investigations**
- Sputum: Xpert MTB/RIF Ultra<sup>E</sup>, culture<sup>F</sup>, storage, WGS<sup>P</sup>
  - Blood: HIV/CD4 counts<sup>G</sup>, Cepheid host response, TAM-TB, IGRA SD Biosensor, PBMC<sup>L</sup>, storage<sup>J</sup>
  - Urine: dipstick/LAM, storage

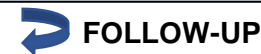

**EVENTS AT UNSCHEDULED UNWELL VISIT(S)**  
(phone/on-site)<sup>C,K,M</sup>

- Assessment of vital signs, medical history
  - Screening for high blood pressure, WHO TB symptoms,
  - Digital CRX<sup>H,I</sup>
- Specimen investigations**
- Sputum: Xpert MTB/RIF Ultra, culture, storage, WGS<sup>P</sup>
  - Blood: Cepheid host response, TAM-TB, storage<sup>J</sup>
  - Urine: dipstick/LAM, storage

**EVENTS AT UN-SCHEDULED FOLLOW-UP VISIT(S)<sup>B</sup>** (phone)

- Assessment of medical history
  - Screening for WHO TB symptoms
- Specimen investigations**
- None

**EVENTS AT 6months ±30days/ 12months ±30days/ 18months ±30days/ 24months ±30days<sup>A</sup> FOLLOW-UP VISITS**

- Assessment of vital signs, medical history
  - Screening for high blood pressure, WHO TB symptoms
  - Digital CXR<sup>I</sup>, spirometry<sup>N</sup>
- Specimen investigations**
- Sputum: Xpert MTB/RIF Ultra<sup>E</sup>, culture<sup>F</sup>, storage<sup>D</sup>, WGS<sup>P</sup>
  - Blood: Cepheid host response, TAM-TB, PBMC<sup>L</sup>, storage
  - Urine: dipstick/LAM, storage<sup>J</sup>

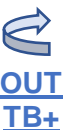

Optional

Optional

1  
2  
3  
4  
5  
6  
7  
8  
9  
10  
11  
12  
13  
14  
15  
16  
17  
18  
19  
20  
21  
22  
23  
24  
25  
26  
27  
28  
29  
30  
31  
32  
33  
34  
35  
36  
37  
38  
39  
40  
41  
42  
43  
44  
45  
46

**Figure 3.** Eligibility criteria and schedules of events for index cases and household contacts

For peer review only



**Figure 4.** Study design.

| Section & Topic          | No  | Item                                                                                                                                                   | Reported on page # |
|--------------------------|-----|--------------------------------------------------------------------------------------------------------------------------------------------------------|--------------------|
| <b>TITLE OR ABSTRACT</b> |     |                                                                                                                                                        |                    |
|                          | 1   | Identification as a study of diagnostic accuracy using at least one measure of accuracy (such as sensitivity, specificity, predictive values, or AUC)  | 2                  |
| <b>ABSTRACT</b>          |     |                                                                                                                                                        |                    |
|                          | 2   | Structured summary of study design, methods, results, and conclusions (for specific guidance, see STARD for Abstracts)                                 | 2-3                |
| <b>INTRODUCTION</b>      |     |                                                                                                                                                        |                    |
|                          | 3   | Scientific and clinical background, including the intended use and clinical role of the index test                                                     | 5-6                |
|                          | 4   | Study objectives and hypotheses                                                                                                                        | 6                  |
| <b>METHODS</b>           |     |                                                                                                                                                        |                    |
| <i>Study design</i>      | 5   | Whether data collection was planned before the index test and reference standard were performed (prospective study) or after (retrospective study)     | 6-7                |
| <i>Participants</i>      | 6   | Eligibility criteria                                                                                                                                   | 7 (Figure 3)       |
|                          | 7   | On what basis potentially eligible participants were identified (such as symptoms, results from previous tests, inclusion in registry)                 | 7 (Figure 3)       |
|                          | 8   | Where and when potentially eligible participants were identified (setting, location and dates)                                                         | 7                  |
|                          | 9   | Whether participants formed a consecutive, random or convenience series                                                                                | 7, 11              |
| <i>Test methods</i>      | 10a | Index test, in sufficient detail to allow replication                                                                                                  | 8-10, 11-13        |
|                          | 10b | Reference standard, in sufficient detail to allow replication                                                                                          | 8-10, 11-13        |
|                          | 11  | Rationale for choosing the reference standard (if alternatives exist)                                                                                  | 8-10, 11-13        |
|                          | 12a | Definition of and rationale for test positivity cut-offs or result categories of the index test, distinguishing pre-specified from exploratory         | 13-14              |
|                          | 12b | Definition of and rationale for test positivity cut-offs or result categories of the reference standard, distinguishing pre-specified from exploratory | 13-14              |
|                          | 13a | Whether clinical information and reference standard results were available to the performers/readers of the index test                                 | 13-14              |
|                          | 13b | Whether clinical information and index test results were available to the assessors of the reference standard                                          | 13-14              |
| <i>Analysis</i>          | 14  | Methods for estimating or comparing measures of diagnostic accuracy                                                                                    | 13-14              |
|                          | 15  | How indeterminate index test or reference standard results were handled                                                                                | 13-14              |
|                          | 16  | How missing data on the index test and reference standard were handled                                                                                 | 14                 |
|                          | 17  | Any analyses of variability in diagnostic accuracy, distinguishing pre-specified from exploratory                                                      | 13-14              |
|                          | 18  | Intended sample size and how it was determined                                                                                                         | 11                 |
| <b>RESULTS</b>           |     |                                                                                                                                                        |                    |
| <i>Participants</i>      | 19  | Flow of participants, using a diagram                                                                                                                  | 8-10 (Figure 3)    |
|                          | 20  | Baseline demographic and clinical characteristics of participants                                                                                      | 8-10 (Figure 3)    |
|                          | 21a | Distribution of severity of disease in those with the target condition                                                                                 |                    |
|                          | 21b | Distribution of alternative diagnoses in those without the target condition                                                                            |                    |
|                          | 22  | Time interval and any clinical interventions between index test and reference standard                                                                 |                    |
| <i>Test results</i>      | 23  | Cross-tabulation of the index test results (or their distribution) by the results of the reference standard                                            |                    |
|                          | 24  | Estimates of diagnostic accuracy and their precision (such as 95% confidence intervals)                                                                | 13-14              |
|                          | 25  | Any adverse events from performing the index test or the reference standard                                                                            |                    |
| <b>DISCUSSION</b>        |     |                                                                                                                                                        |                    |
|                          | 26  | Study limitations, including sources of potential bias, statistical uncertainty, and generalisability                                                  | 3                  |
|                          | 27  | Implications for practice, including the intended use and clinical role of the index test                                                              | 5-6                |
| <b>OTHER INFORMATION</b> |     |                                                                                                                                                        |                    |
|                          | 28  | Registration number and name of registry                                                                                                               | 2                  |
|                          | 29  | Where the full study protocol can be accessed                                                                                                          |                    |
|                          | 30  | Sources of funding and other support; role of funders                                                                                                  | 16                 |

# STARD 2015

---

## AIM

STARD stands for “Standards for Reporting Diagnostic accuracy studies”. This list of items was developed to contribute to the completeness and transparency of reporting of diagnostic accuracy studies. Authors can use the list to write informative study reports. Editors and peer-reviewers can use it to evaluate whether the information has been included in manuscripts submitted for publication.

---

## EXPLANATION

A **diagnostic accuracy study** evaluates the ability of one or more medical tests to correctly classify study participants as having a **target condition**. This can be a disease, a disease stage, response or benefit from therapy, or an event or condition in the future. A medical test can be an imaging procedure, a laboratory test, elements from history and physical examination, a combination of these, or any other method for collecting information about the current health status of a patient.

The test whose accuracy is evaluated is called **index test**. A study can evaluate the accuracy of one or more index tests. Evaluating the ability of a medical test to correctly classify patients is typically done by comparing the distribution of the index test results with those of the **reference standard**. The reference standard is the best available method for establishing the presence or absence of the target condition. An accuracy study can rely on one or more reference standards.

If test results are categorized as either positive or negative, the cross-tabulation of the index test results against those of the reference standard can be used to estimate the **sensitivity** of the index test (the proportion of participants *with* the target condition who have a positive index test), and its **specificity** (the proportion *without* the target condition who have a negative index test). From this cross-tabulation (sometimes referred to as the contingency or “2x2” table), several other accuracy statistics can be estimated, such as the positive and negative **predictive values** of the test. Confidence intervals around estimates of accuracy can then be calculated to quantify the statistical **precision** of the measurements.

If the index test results can take more than two values, categorization of test results as positive or negative requires a **test positivity cut-off**. When multiple such cut-offs can be defined, authors can report a receiver operating characteristic (ROC) curve which graphically represents the combination of sensitivity and specificity for each possible test positivity cut-off. The **area under the ROC curve** informs in a single numerical value about the overall diagnostic accuracy of the index test.

The **intended use** of a medical test can be diagnosis, screening, staging, monitoring, surveillance, prediction or prognosis. The **clinical role** of a test explains its position relative to existing tests in the clinical pathway. A replacement test, for example, replaces an existing test. A triage test is used before an existing test; an add-on test is used after an existing test.

Besides diagnostic accuracy, several other outcomes and statistics may be relevant in the evaluation of medical tests. Medical tests can also be used to classify patients for purposes other than diagnosis, such as staging or prognosis. The STARD list was not explicitly developed for these other outcomes, statistics, and study types, although most STARD items would still apply.

---

## DEVELOPMENT

This STARD list was released in 2015. The 30 items were identified by an international expert group of methodologists, researchers, and editors. The guiding principle in the development of STARD was to select items that, when reported, would help readers to judge the potential for bias in the study, to appraise the applicability of the study findings and the validity of conclusions and recommendations. The list represents an update of the first version, which was published in 2003.

More information can be found on <http://www.equator-network.org/reporting-guidelines/stard>.

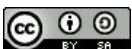

# BMJ Open

## Early risk assessment in pediatric and adult household contacts of confirmed tuberculosis cases by novel diagnostic tests (ERASE-TB): protocol for a prospective, non-interventional, longitudinal, multi-country cohort study

|                                 |                                                                                                                                                                                                                                                                                                                                                                                                                                                                                                                                                                                                                                                                                                                                                                                                                                                                                                                                                                                                                                                                                                                                                                                                                                                                                                                                                                                                                                                                                                                                                                                                                                                                                                                                                                    |
|---------------------------------|--------------------------------------------------------------------------------------------------------------------------------------------------------------------------------------------------------------------------------------------------------------------------------------------------------------------------------------------------------------------------------------------------------------------------------------------------------------------------------------------------------------------------------------------------------------------------------------------------------------------------------------------------------------------------------------------------------------------------------------------------------------------------------------------------------------------------------------------------------------------------------------------------------------------------------------------------------------------------------------------------------------------------------------------------------------------------------------------------------------------------------------------------------------------------------------------------------------------------------------------------------------------------------------------------------------------------------------------------------------------------------------------------------------------------------------------------------------------------------------------------------------------------------------------------------------------------------------------------------------------------------------------------------------------------------------------------------------------------------------------------------------------|
| Journal:                        | <i>BMJ Open</i>                                                                                                                                                                                                                                                                                                                                                                                                                                                                                                                                                                                                                                                                                                                                                                                                                                                                                                                                                                                                                                                                                                                                                                                                                                                                                                                                                                                                                                                                                                                                                                                                                                                                                                                                                    |
| Manuscript ID                   | bmjopen-2022-060985.R2                                                                                                                                                                                                                                                                                                                                                                                                                                                                                                                                                                                                                                                                                                                                                                                                                                                                                                                                                                                                                                                                                                                                                                                                                                                                                                                                                                                                                                                                                                                                                                                                                                                                                                                                             |
| Article Type:                   | Protocol                                                                                                                                                                                                                                                                                                                                                                                                                                                                                                                                                                                                                                                                                                                                                                                                                                                                                                                                                                                                                                                                                                                                                                                                                                                                                                                                                                                                                                                                                                                                                                                                                                                                                                                                                           |
| Date Submitted by the Author:   | 23-Jun-2022                                                                                                                                                                                                                                                                                                                                                                                                                                                                                                                                                                                                                                                                                                                                                                                                                                                                                                                                                                                                                                                                                                                                                                                                                                                                                                                                                                                                                                                                                                                                                                                                                                                                                                                                                        |
| Complete List of Authors:       | Marambire, Edson; Biomedical Research and Training Institute, Banze, Denise; Instituto Nacional de Saúde Mfinanga, Alfred; Mbeya Medical Research Centre Mutsvangwa, Junior; Biomedical Research and Training Institute Mbunda, Theodora ; NIMR-Mbeya Medical Research Programme Ntinginya, Nyanda; 6. National Institute of Medical Research-Mbeya Medical Research Centre Celso, Khosa; Instituto Nacional de Saúde Kallenius, Gunilla; Karolinska Institutet Calderwood, Claire J.; London School of Hygiene and Tropical Medicine Faculty of Infectious and Tropical Diseases Geldmacher, Christof; University Hospital, Division of Infectious Diseases and Tropical Medicine, LMU Munich ; German Center for Infection Research, Partner site Munich Held, Kathrin; University Hospital, Division of Infectious and Tropical Medicine, LMU Munich ; German Center for Infection Research, Partner site Munich Appalarowthu, Tejaswi; University Hospital, Division of Infectious Diseases and Tropical Medicine, LMU Munich; German Center for Infection Research, Partner site Munich Rieß, Friedrich; University Hospital, Division of Infectious Diseases and Tropical Medicine, LMU Munich; German Center for Infection Research, Partner site Munich Panzner, Ursula; University Hospital, Division of Infectious Diseases and Tropical Medicine, LMU Munich; German Center for Infection Research, Partner site Munich Heinrich, Norbert; University Hospital, Division of Infectious Diseases and Tropical Medicine, LMU Munich; German Center for Infection Research, Partner site Munich Kranzer, Katharina; London School of Hygiene and Tropical Medicine Faculty of Infectious and Tropical Diseases; Biomedical Research and Training Institute |
| <b>Primary Subject Heading</b>: | Respiratory medicine                                                                                                                                                                                                                                                                                                                                                                                                                                                                                                                                                                                                                                                                                                                                                                                                                                                                                                                                                                                                                                                                                                                                                                                                                                                                                                                                                                                                                                                                                                                                                                                                                                                                                                                                               |
| Secondary Subject Heading:      | Diagnostics, Infectious diseases                                                                                                                                                                                                                                                                                                                                                                                                                                                                                                                                                                                                                                                                                                                                                                                                                                                                                                                                                                                                                                                                                                                                                                                                                                                                                                                                                                                                                                                                                                                                                                                                                                                                                                                                   |

1  
2  
3  
4  
5  
6  
7  
8  
9  
10  
11  
12  
13  
14  
15  
16  
17  
18  
19  
20  
21  
22  
23  
24  
25  
26  
27  
28  
29  
30  
31  
32  
33  
34  
35  
36  
37  
38  
39  
40  
41  
42  
43  
44  
45  
46  
47  
48  
49  
50  
51  
52  
53  
54  
55  
56  
57  
58  
59  
60

|           |                                                                                                                                 |
|-----------|---------------------------------------------------------------------------------------------------------------------------------|
| Keywords: | Tuberculosis < INFECTIOUS DISEASES, Diagnostic microbiology < INFECTIOUS DISEASES, RESPIRATORY MEDICINE (see Thoracic Medicine) |
|           |                                                                                                                                 |

SCHOLARONE™  
Manuscripts

1  
2  
3 1 **Early risk assessment in pediatric and adult household contacts of confirmed**  
4  
5 2 **tuberculosis cases by novel diagnostic tests (ERASE-TB): protocol for a**  
6  
7 3 **prospective, non-interventional, longitudinal, multi-country cohort study**  
8  
9 4

10 5 Edson Tawanda Marambire<sup>1\*</sup>, Denise Banze<sup>2§</sup>, Alfred Mfinanga<sup>3§</sup>, Junior Mutsvangwa<sup>1</sup>, Theodora  
11 6 Mbunda<sup>3</sup>, Elias N. Nyanda<sup>3</sup>, Khosa Celso<sup>2</sup>, Gunilla Kallenius<sup>4</sup>, Claire J. Calderwood<sup>5</sup>, Christof  
12 7 Geldmacher<sup>6,7</sup>, Kathrin Held<sup>6,7</sup>, Tejaswi Appalarowthu<sup>6,7</sup>, Friedrich Rieß<sup>6,7</sup>, Ursula Panzner<sup>6,7</sup>, Norbert  
13 8 Heinrich<sup>6,7#</sup>, Katharina Kranzer<sup>1,5,6#</sup>, on behalf of the ERASE-TB Consortium  
14  
15  
16  
17  
18  
19  
20  
21  
22

23 10 <sup>1</sup>Biomedical Research and Training Institute, Harare, Zimbabwe

24 11 <sup>2</sup>Instituto Nacional de Saúde, Marracuene, Mozambique

25 12 <sup>3</sup>National Institute for Medical Research - Mbeya Medical Research Centre, Mbeya, Tanzania

26 13 <sup>4</sup>Karolinska Institute, Stockholm, Sweden

27 14 <sup>5</sup>Faculty of Infectious and Tropical Diseases and Tuberculosis Centre, London School of Hygiene &  
28 15 Tropical Medicine, London, UK

29 16 <sup>6</sup>Division of Infectious Diseases and Tropical Medicine, University Hospital, LMU Munich, Munich,  
30 17 Germany

31 18 <sup>7</sup>German Center for Infection Research (DZIF), Partner site Munich, Munich, Germany  
32  
33  
34  
35  
36  
37  
38  
39  
40  
41  
42  
43  
44  
45  
46  
47  
48  
49  
50  
51  
52  
53  
54  
55

20 \*Corresponding author: Edson Tawanda Marambire; 8 Rose Avenue, Belgravia, Harare, Zimbabwe; e-  
21 mail: edsonmarambire@gmail.com; phone: +263772286311  
22

23 § Contributed equally

24 # Contributed equally  
25

26 Word count: 3,668  
27

28 **Keywords:** *Mycobacterium tuberculosis*, diagnostics, cohort study, household contacts, WHO  
29 END TB strategy, ERASE-TB  
30  
31  
32  
33  
34  
35  
36  
37  
38  
39  
40  
41  
42  
43  
44  
45  
46  
47  
48  
49  
50  
51  
52  
53  
54  
55  
56  
57  
58  
59  
60



## 30 **ABSTRACT**

### 31 **Introduction**

32 The World Health Organization (WHO) End-TB Strategy calls for the development of novel  
33 diagnostics to detect tuberculosis earlier and more accurately. Better diagnostics, together with  
34 tools to predict disease progression are critical for achieving WHO END-TB targets. The Early  
35 Risk Assessment in TB contactS by new diagnostic tEsts (ERASE-TB) study aims to evaluate  
36 novel diagnostics and testing algorithms for early tuberculosis diagnosis and accurate  
37 prediction of disease progression among household contacts exposed to confirmed index  
38 cases in Mozambique, Tanzania and Zimbabwe.

### 40 **Methods and analysis**

41 A total of 2,100 household contacts (HHCs) (aged  $\geq 10$  years) of adults with microbiologically-  
42 confirmed pulmonary tuberculosis will be recruited and followed up at 6-month intervals for 18  
43 to 24 months. At each time-point a WHO symptom screen and digital chest-radiograph (dCXR)  
44 will be performed, and blood and urine samples collected. Individuals screening positive (WHO  
45 symptom screen or dCXR) will be requested to provide sputum for Xpert MTB/Rif Ultra. At  
46 baseline, HHCs will also be screened for HIV, diabetes (HbA1c), chronic lung disease  
47 (spirometry), hypertension and anaemia. Study outcomes will be co-prevalent tuberculosis  
48 (diagnosed at enrollment), incident tuberculosis (diagnosed during follow-up) or no  
49 tuberculosis at completion of follow up. Novel diagnostics will be validated using fresh and  
50 biobanked samples with a nested case control design. Cases are defined as HHCs diagnosed  
51 with tuberculosis (for early diagnosis) or with incident tuberculosis (for prediction of  
52 progression) and will be matched by age, sex and country to HHCs who remain healthy  
53 (controls). Statistical analyses will include assessment of diagnostic accuracy by constructing  
54 receiver operating curves and calculation of sensitivity and specificity.

### 56 **Ethics and dissemination**

1  
2  
3 57 ERASE-TB has been approved by regulatory and ethical committees in each African country  
4  
5 58 and by each partner organisation. Consent, with additional assent for participants <18 years,  
6  
7 59 is voluntary. Attestation by impartial witnesses is sought in case of illiteracy. Confidentiality of  
8  
9 60 participants is being maintained throughout. Study findings will be presented at scientific  
10  
11 61 conferences and published in peer-reviewed international journals.  
12

13  
14 62

15  
16 63 **Study registration number**

17  
18 64 NCT04781257  
19  
20  
21  
22  
23  
24  
25  
26  
27  
28  
29  
30  
31  
32  
33  
34  
35  
36  
37  
38  
39  
40  
41  
42  
43  
44  
45  
46  
47  
48  
49  
50  
51  
52  
53  
54  
55  
56  
57  
58  
59  
60

### 65 **Strengths and limitations of this study**

- 66 • Recruitment of highly infectious index cases aimed at maximising the number of  
67 tuberculosis (TB) diagnoses in the household contact (HHCs) cohort.
- 68 • Sequencing of *Mycobacterium tuberculosis* isolates from both index cases and HHCs  
69 allows confirmation of household transmission and thus determination of timing of the  
70 transmission event; resulting in more precise estimates of new test sensitivity  
71 compared to population-based cohorts with unknown timing of infection.
- 72 • Large sample size across three southern African countries with high HIV prevalence;  
73 including adolescents will ensure study findings are generalisable to the clinically  
74 relevant population at high risk of TB compared to studies focused on adults only.
- 75 • Despite the large cohort of HHCs, the number of diagnosed TB cases will be small,  
76 limiting the power of the study and sub-group analyses such as by age and HIV status.
- 77 • Geographically limited to sub-Saharan Africa, therefore results may not be  
78 generalisable to other populations, including those with lower HIV prevalence such as  
79 in South-East Asia or the Americas.

## 80 INTRODUCTION

81 Tuberculosis (TB) remains a leading global public health problem, with an estimated 10 million  
82 new cases and 1.5 million deaths globally in 2020 [1]. In 2014, the World Health Assembly  
83 approved the World Health Organization (WHO) End-TB Strategy, aiming for a 90% reduction  
84 in TB incidence and 95% reduction in TB deaths by 2035 [2]. However, in 2019, three million  
85 TB cases ('the missing millions') remained undiagnosed and untreated globally, resulting in  
86 potentially avoidable morbidity, mortality and onward transmission. The Covid-19 pandemic  
87 has resulted in a large decrease in the number of people newly diagnosed with TB and  
88 reported. This has increased the diagnostic gap by a further 1.3 million, resulting in an  
89 estimated 4.2 million undiagnosed TB cases in 2020 [3]. Also, for the first time in a decade TB  
90 deaths have risen, from an estimated 1.4 million in 2019 to 1.5 million in 2020, as a result of  
91 reduced access to and provision of essential TB services including diagnostics during the  
92 Covid-19 pandemic.

93  
94 Without an efficacious and safe vaccine, early detection and containment are the main tools  
95 to interrupt transmission and successfully control TB. Similar to SARS-CoV2, asymptomatic  
96 spreading of *M.tuberculosis* and subclinical but infectious disease states are a major concern  
97 in the control of airborne infectious diseases [4]. Early and accurate identification of persons  
98 with TB, combined with identification of those at risk of progression to TB and provision of  
99 targeted preventive treatment are critical to reducing TB-associated morbidity and mortality,  
100 and preventing onward transmission.

101  
102 Currently available diagnostics such as sputum microscopy, mycobacterial culture and nucleic  
103 acid amplification tests are based on direct pathogen detection, thus requiring a high  
104 mycobacterial load; they therefore predominately target advanced TB when onward  
105 transmission and significant lung damage has occurred [5,6]. Further, for many patients with  
106 minimal or no symptoms, expectoration of high-quality sputum specimens remains

1  
2  
3 107 challenging, limiting the accuracy of sputum-based tests. The same holds true for young  
4  
5 108 children and people living with HIV.  
6

7 109  
8  
9 110 The **Early Risk Assessment in TB Contacts by new diagnostic tests** (ERASE-TB) study aims  
10  
11 111 to fill this diagnostic gap by evaluating new sputum and non-sputum-based TB diagnostics for  
12  
13 112 early TB detection (before onward transmission occurs), as well as tools for more accurate  
14  
15 113 prediction of TB progression to allow for targeted preventive therapy.  
16  
17

18 114

## 19 20 115 **METHODS AND ANALYSES**

### 21 22 116 **Study objectives**

23  
24 117 ERASE-TB's primary objectives are (I) to determine the sensitivity and specificity of novel  
25  
26 118 diagnostics to detect TB, in particular asymptomatic or minimally symptomatic TB; (II) to  
27  
28 119 evaluate novel diagnostics for detection of likely TB progression; and (III) to enhance the  
29  
30 120 performance of novel diagnostics by simulating testing algorithms coupled with individual risk  
31  
32 121 estimates from a mathematical model. The secondary objectives are (I) to determine the TB  
33  
34 122 prevalence among household contacts (HHCs) of infectious TB index cases (ICs) at baseline  
35  
36 123 and during a 18-24 months follow-up; (II) to establish a biorepository of cryopreserved  
37  
38 124 specimens from HHCs for future development and validation of diagnostic tests; and (III) to  
39  
40 125 assess the association of selected chronic disease conditions and TB among HHCs.  
41  
42

43 126

### 44 45 127 **Study endpoints**

46  
47 128 The study's primary endpoints are the presence or development of TB among HHCs with the  
48  
49 129 following possible scenarios of (I) prevalent symptomatic TB at baseline, (II) incident TB during  
50  
51 130 follow-up, and (III) remained healthy until study completion. An endpoint review committee will  
52  
53 131 review the data and case classification before finalization.  
54

55  
56 132

57  
58 133 Through the sequencing of *Mycobacterium tuberculosis* (*Mtb*) isolates, cases of co-prevalent  
59  
60 134 or incident TB will be classified either as secondary, infected by the source case – the timepoint

1  
2  
3 135 of infection will be known; or as infected by another, unknown source of infection, with an  
4  
5 136 unknown timepoint of infection.  
6

7 137

### 8 9 138 **Recruitment sites**

10  
11 139 Recruitment of ICs and HHCs at selected primary healthcare facilities and communities has  
12  
13 140 commenced in Harare, Zimbabwe in March 2021, Maputo, Mozambique in August 2021, and  
14  
15 141 Mbeya, Tanzania in September 2021. Partners of the ERASE-TB consortium are illustrated in  
16  
17 142 Figure 1. All three countries have a high TB incidence ranging from 100 to 499/100,000  
18  
19 143 population [1] and HIV prevalence among adults aged 15 years and older of 5% to 20% [7].  
20  
21 144 The African research institutions have established collaborations with their respective National  
22  
23 145 Tuberculosis Programs ensuring referral and appropriate follow-up of TB patients. Figure 2  
24  
25 146 illustrates the geographic location of research institutions, healthcare facilities where  
26  
27 147 recruitment is taking place, demographic characteristics of study populations, and estimates  
28  
29 148 on TB incidence and HIV prevalence [8–15].  
30  
31

32 149

### 33 34 150 **Study design**

35  
36 151 ERASE-TB is a non-interventional, longitudinal, prospective cohort study among HHCs aged  
37  
38 152  $\geq 10$  years exposed to highly infectious pulmonary TB ICs aged  $\geq 18$  years. Eligibility criteria  
39  
40 153 are detailed in Figure 3 and the study design is shown in Figure 4. TB ICs are eligible if the  
41  
42 154 bacterial load in their sputum is at least at the “medium” level according to Xpert MTB/RIF or  
43  
44 155 Xpert MTB/RIF Ultra, and they have received less than seven daily doses of anti-TB treatment  
45  
46 156 before enrollment. This maximises the likelihood of culturing and storing *Mtb* isolates. The total  
47  
48 157 study duration will be 36 months. This includes 12-months enrollment of ICs and HHCs, and  
49  
50 158 18- to 24-months follow-ups of HHCs. Follow-up ends when a HHCs withdraws from the study,  
51  
52 159 is lost to follow-up, dies, or is diagnosed with TB and referred for treatment. Scheduled or  
53  
54 160 unscheduled unwell visits can be conducted physically and/or telephonically in case of  
55  
56 161 abnormal finding e.g. by abnormal dCXR, or when a participant feels unwell inbetween  
57  
58 162 scheduled follow-up visits.  
59  
60

163

**164 Procedures****165 TB index cases**

166 Following informed consent obtained, a questionnaire is administered to collect socio-  
167 demographic information, TB risk factors, and the medical history of TB, HIV and other  
168 diseases. Two spontaneous sputum samples are obtained, of which one is for mycobacterial  
169 culturing and one for storage for performing retrospectively Molecular Bacterial Load Assay  
170 (MBLA) to quantify viable *Mtb* by 16S rRNA [6]; an alternative means to quantify expectorated  
171 bacterial load for an estimate of infectiousness. Both liquid and solid mycobacterial cultures  
172 are performed on decontaminated sputum samples, with all *Mtb* isolates stored at -80 degrees  
173 for future DNA extraction and whole genome sequencing. A questionnaire on symptom  
174 duration and TB risk factors is also administered.

175

**176 Household key informant**

177 At baseline, a household key informant (either the TB index case or one of the household  
178 contacts) is identified and asked to answer questions of a household questionnaire that collects  
179 socio-economic elements like structure of the house or flat, income and household assets, and  
180 covariates possibly associated with risk of TB infection, e.g., windows/air exchange, presence  
181 of comorbid conditions, and risk factors like the source of cooking energy, and properties of  
182 the household kitchen.

183

**184 Household contacts**

185 Informed consent is obtained from all eligible adult HHCs. For HHC <18 years of age, the  
186 guardian is asked to provide informed consent, with assent also sought from children  
187 dependent on local guidance. At baseline a questionnaire is administered collecting  
188 information on socioeconomic and demographic characteristics, past medical history of TB,  
189 HIV and other diseases, exposure risk factors, smoking and alcohol history. The physical  
190 examination includes height, weight, mid-upper arm circumference and blood pressure

1  
2  
3 191 measurement. In addition, all HHCs are offered free HIV testing according to the National  
4  
5 192 Guidelines. All people with confirmed HIV infection will have CD4 counts performed and be  
6  
7 193 referred for TB preventive therapy. Those not yet on antiretroviral therapy (ART) and those  
8  
9 194 who interrupted ART are referred for ART at local services.  
10

11 195  
12  
13 196 Point of care HbA1c (A1cCare, SD Biosensor, Gyeonggi-do, Republic of Korea) and  
14  
15 197 haemoglobin (Hemocue 301+, Hemocue, Angelholm, Sweden) tests and spirometry (including  
16  
17 198 pre- and post-bronchodilation with inhaled salbutamol) are performed at baseline or the six-  
18  
19 199 month visit. HHCs who did not take up HIV testing or other screening at baseline are offered  
20  
21 200 these tests at each study visit. Any HHCs with test results requiring treatment or further  
22  
23 201 investigations are referred for respective services.  
24

25 202  
26  
27 203 HHCs are screened for TB using the WHO symptom questionnaire and a digital chest-  
28  
29 204 radiograph (dCXR), reviewed by a clinical officer. dCXRs are not performed in pregnant HHCs.  
30  
31 205 HHCs with a positive WHO symptom screening and abnormal dCXR are asked to provide  
32  
33 206 sputum samples for TB investigations i.e., for GeneXpert and mycobacterial culture. Those  
34  
35 207 with negative symptom screen and normal dCXR are asked to provide a spontaneous sputum  
36  
37 208 sample for storage (with sputum induction performed if required).  
38  
39 209

40  
41 210 At baseline, urine, serum, plasma, whole blood (native, and with RNA preservation in  
42  
43 211 PAXgene® tubes [BD Biosciences, NJ, USA]) are stored. A finger-prick sample is taken and  
44  
45 212 investigated using the Xpert TB Host Response RUO Prototype cartridge (Cepheid,  
46  
47 213 Sunnyvale, CA, USA). T-cell Activation Marker Tuberculosis (TAM-TB) assay and Interferon  
48  
49 214 Gamma Release Assay (IGRA; STANDARDTM F TB-Feron FIA (IFN-gamma; SD Biosensor,  
50  
51 215 Republic of Korea), are performed on fresh venous blood. In Tanzania and Mozambique,  
52  
53 216 storage of peripheral blood mononuclear cells for later characterization of the TB-specific  
54  
55 217 immune response is also performed.  
56  
57 218



1  
2  
3 219 Procedures for follow-up and unwell visits are similar to those at baseline. Measurement of  
4  
5 220 HIV status, haemoglobin, HbA1c, spirometry, CD4 count and IGRA testing are not performed  
6  
7 221 at follow-up visits, unless not done previously. At the last scheduled visit all HHCs not known  
8  
9 222 to have HIV are re-offered HIV testing and a spontaneous or induced sputum sample is stored  
10  
11 223 for all participants.  
12

13 224

15 225 ***Household contacts screening positive for TB symptoms and/or with a DCXR***  
16  
17 226 ***suggestive of TB***

18  
19  
20 227 HHCs screening positive for symptoms and/or those with DCXRs suggestive of TB are asked  
21  
22 228 for a sputum sample, which is investigated using Xpert MTB/RIF Ultra (Cepheid). If this sample  
23  
24 229 is positive for *Mtb* (including a trace result), a minimum of two additional sputum samples are  
25  
26 230 investigated, following decontamination, with Xpert MTB/RIF Ultra, solid and liquid culture.  
27  
28 231 Isolates stored from these cultures will be sequenced for matching with the IC isolates in order  
29  
30 232 to verify intra-household transmission. Sputum induction is performed for those unable to  
31  
32 233 provide a spontaneous sputum sample. HHCs with microbiologically confirmed TB are referred  
33  
34 234 for TB treatment to the National TB Programme.  
35

36 235

37  
38  
39 236 ***Patient and public involvement***

40  
41 237 The ERASE-TB study sites have established Community Advisory Boards, which are voices  
42  
43 238 of communities, people affected, and study participants, providing a strategic link between the  
44  
45 239 communities and the study team. Community Advisory Boards meet regularly and provide  
46  
47 240 feedback on design, procedures and conduct of the study. They will also be closely involved  
48  
49 241 in the dissemination of study results. In addition to the Community Advisory Boards, each study  
50  
51 242 site conducts community engagement activities focused on young people with the aim to foster  
52  
53 243 interest in science and research, specifically in the field of respiratory diseases/illness. This  
54  
55 244 includes close partnership with schools and universities. Furthermore, planned qualitative  
56  
57 245 research will specifically aim to understand the perceptions of HHCs with regards to TB  
58  
59 246 diagnostics and screening.  
60

1  
2  
3 2474  
5 248 **Sample size**

6  
7 249 An estimated 800 to 900 TB-confirmed ICs are required for the subsequent enrollment of an  
8  
9 250 anticipated 2,100 HHCs, i.e., 700 HHCs per country. Loss to follow-up of HHCs is estimated  
10  
11 251 to be 10%. A total of 64 HHCs (3%) are estimated to be diagnosed with TB during the study  
12  
13 252 period, based on previous active case finding studies among HHCs [16]. Validation for  
14  
15 253 subclinical and early TB will include incident (n=49) and co-prevalent TB cases (n=15).  
16  
17 254 Validation for detection of incipient *M.tb* infection will include samples of participants with  
18  
19 255 incident TB (n=49) matched 1:4 to samples of participants without TB (n=196). For tests  
20  
21 256 diagnosing incipient *M.tb* infection sensitivities of 73% and 82% would be detected with a  
22  
23 257 precision of 59-85% and 68-91% respectively. For specificities of 92% and 94% the confidence  
24  
25 258 intervals would be 87-95% and 90-97%.

26  
27  
28 25929  
30 260 **Novel test candidates**

31  
32 261 A range of novel test candidates targeted at pathogen detection or identification of host  
33  
34 262 responses to *Mtb* are being applied, either in real-time (for all participants) or retrospectively  
35  
36 263 (in a case-control design). Whilst a number of novel test candidates have been pre-specified,  
37  
38 264 the ERASE-TB biobanking processes allow for addition of further candidate tests to be  
39  
40 265 evaluated on stored samples as they become available.

41  
42  
43 266

44  
45 267 DCXRs offer good sensitivity for diagnosis of pulmonary TB. However, high inter- and intra-  
46  
47 268 investigator variability, and lack of trained interpreters present a barrier to implementation in  
48  
49 269 many high-TB burden settings. Computer-aided interpretation systems, such as CAD4TB  
50  
51 270 (Delft Imaging, Hertogenbosch, Netherlands) and qXR (Qure.ai, India) may increase image-  
52  
53 271 reading capacity, with good performance, and serve, therefore, as a systematic screening tool  
54  
55 272 to identify individuals in need of confirmatory TB tests [17,18].

56  
57  
58 273

1  
2  
3 274 Xpert MTB/RIF Ultra is a nucleic acid amplification test for *Mtb* with a lower limit of detection  
4  
5 275 compared to the previous Xpert MTB/RIF generation, and, therefore, conferring higher  
6  
7 276 sensitivity in paucibacillary specimens. This, however, comes at the expense of specificity,  
8  
9 277 particularly in high TB incidence settings, resulting in 'false positives' [19]. WHO guidelines  
10  
11 278 recommend Xpert MTB/RIF Ultra for TB diagnosis among adults and children acknowledging  
12  
13 279 that further evaluation, particularly of the role of Xpert MTB/RIF Ultra for TB screening, is  
14  
15 280 needed [20,21].  
16

17  
18 281  
19  
20 282 FLOW-TB is an advanced enzyme-linked immunosorbent assay for the detection of *Mtb*  
21  
22 283 lipoarabinomannan (a mycobacterial cell wall component) in urinary specimens with results  
23  
24 284 available within 65 minutes [22].  
25

26 285  
27  
28 286 The T-cell activation marker-TB assay (TAM-TB) detects *Mtb*-specific CD4 T-cells through *in-*  
29  
30 287 *vitro* antigen stimulation with *Mtb*-derived peptides, i.e., from ESAT-6 and CFP-10, followed by  
31  
32 288 flow cytometry. TAM-TB discriminated latent *Mtb* infection from TB in freshly collected blood  
33  
34 289 with 83% sensitivity and 96-98% specificity in previous studies. Further, TAM-TB may detect  
35  
36 290 early TB disease progression up to 9 months prior to the identification of *Mtb* in sputum [23–  
37  
38 291 25].  
39

40  
41 292  
42  
43 293 Multiple transcriptomic signatures, capturing the host response to TB, have been described as  
44  
45 294 promising candidate tests for earlier TB diagnosis (up to two years before microbiological  
46  
47 295 diagnosis). An individual patient data meta-analysis suggested equivalent performance of  
48  
49 296 eight signatures, with 25-40% sensitivity and 92-95% specificity 0-24 months before TB  
50  
51 297 diagnosis. Diagnostic accuracy of each signature improved as the interval between testing and  
52  
53 298 microbiological TB diagnosis shortened [26]. Several signatures have been developed into  
54  
55 299 polymerase chain reaction (PCR)-based assays to facilitate real-time implementation: the  
56  
57 300 recent CORTIS trial reported sensitivity of 48% and specificity of 75% for incipient TB for the  
58  
59 301 RISK-11 signature [27]. Cepheid have developed a 3-transcript TB score into a fully automated

1  
2  
3 302 in-cartridge PCR assay performed on finger-prick blood using the Xpert platform (Xpert TB  
4  
5 303 Host Response RUO Prototype cartridge). This cartridge will be evaluated using freshly  
6  
7 304 collected specimens in ERASE-TB; storage of RNA-stabilised blood samples also allows for  
8  
9 305 retrospective evaluation of additional transcriptomic signatures in our cohort [28,29]  
10

11 306  
12  
13 307 An alternative approach to capture the host response to TB is through protein-based biomarker  
14  
15 308 signatures. Candidate tests in this category include a serum- or plasma-based multiplex assay  
16  
17 309 assessing 13 protein biomarkers (CRP, procalcitonin [30], sTREM-1 [31,32], angiotensin-2  
18  
19 310 [33,34], interleukin-6 [35], TRAIL [36] and IP-10 [37]) that is being developed by the London  
20  
21 311 School of Hygiene and Tropical Medicine; in addition, a seven biomarker signature is under  
22  
23 312 development as a point-of-care test for TB diagnosis, with 94% sensitivity and 73% specificity  
24  
25 313 detected in previous work [38].  
26  
27  
28  
29

30 314

### 31 315 **Statistical analyses**

32 316 Baseline characteristics and analytical data will be summarized using descriptive statistics  
33  
34 317 inclusive of mean, median, range, standard deviation, and absolute as well as relative  
35  
36 318 frequencies depending on the nature of data. A logistic regression model will be used to identify  
37  
38 319 characteristics of TB among ICs, households and HHCs that are predictive of incident TB.  
39  
40 320 From the study database, we will simulate algorithms of different tests to obtain the testing  
41  
42 321 combination with the best accuracy. We will couple tests with a mathematical model that  
43  
44 322 quantifies the risk of infection and/or disease to enhance predictive performance. The reporting  
45  
46 323 of the development of the prediction model will follow the Transparent Reporting of a  
47  
48 324 multivariable prediction model for Individual Prognosis Or Diagnosis (TRIPOD) Initiative [39].  
49  
50

51 325

52  
53 326 The validation of novel diagnostic tests for detecting TB will be analysed as a 1:4 matched  
54  
55 327 nested case-control study with HHCs diagnosed with TB at baseline and during follow-up  
56  
57 328 serving as cases, and HHCs who do not develop TB during follow-up as controls; controls will  
58  
59 329 be matched for site, age, sex, HIV status and other risk factors for developing TB. Sensitivity

1  
2  
3 330 and specificity of novel tests will be determined using pre-existing positive/negative cut-offs  
4  
5 331 where these exist [40]; and receiver operating curves (ROC) constructed with area under the  
6  
7 332 ROC curve calculated. For tests aiming to identify individuals at high risk of TB in the future,  
8  
9 333 only HHCs who are diagnosed with TB during follow-up will serve as cases (i.e. those  
10  
11 334 diagnosed with TB at baseline will be excluded). Stored samples from all timepoints will be  
12  
13 335 retrieved and diagnostic accuracy (i.e. sensitivity and specificity) of the novel test determined  
14  
15 336 at different time-points before TB diagnosis. The decision of assigning the “active TB”  
16  
17 337 endpoints to participants will be blinded from the new test results to avoid inclusion bias.  
18  
19  
20 338

### 21 22 339 **Data management**

23  
24 340 All source data will be kept confidential in secured locations with restricted access by  
25  
26 341 authorized personnel only inclusive of monitors, auditors and reviewers of ethical and  
27  
28 342 regulatory committees in line with applicable data privacy regulations. Each participant is  
29  
30 343 asked to consent to this handling of the data, and is assigned a pseudonymous identification  
31  
32 344 number that is used throughout the study on all source data.  
33  
34  
35 345

36  
37 346 Accurate documentation of paper-based and electronic source data, e.g., original records and  
38  
39 347 certified copies of original records, progress notes, screening logs, and recorded data from  
40  
41 348 automated instruments, will be maintained. The pseudonymized clinical data captured on  
42  
43 349 paper-based Case Report Forms will be entered at the sites into a database using the web-  
44  
45 350 based Clinical Data Management System of OpenClinica (OpenClinica LLC, Waltham, MA,  
46  
47 351 USA). The study specific database has been built, maintained and hosted by the LMU Klinikum  
48  
49 352 on a centralized secure server. Data modifications and necessary corrections performed in the  
50  
51 353 database also within the context of double data entry will be documented and tracked in audit  
52  
53 354 trails. Data quality and plausibility are assured by a series of pre-programmed edit and range  
54  
55 355 checks in OpenClinica. Further validation checks are programmed in Stata (Statacorp, College  
56  
57 356 Station, TX, USA) with extracts of the database and electronically received data, e.g.,  
58  
59 357 spirometry, dCXR and laboratory, will be integrated into analyses of datasets.  
60

1  
2  
3 3584  
5 **359 Monitoring**

6  
7 360 Assigned study monitors will visit the sites at regular intervals physically and/or virtually in  
8  
9 361 addition to frequent day-to-day communication. Close follow-up on all study-related aspects  
10  
11 362 will be performed to ascertain compliance with standards of Good Clinical Practice, the  
12  
13 363 Declaration of Helsinki, and other local and national regulatory guidelines inclusive of  
14  
15 364 guidelines for infection prevention and control of airborne-transmitted diseases, e.g., social  
16  
17 365 distancing in well-ventilated spaces, and wearing of personal protective equipment. In  
18  
19 366 particular, monitors that support designated study personnel are responsible to verify (I)  
20  
21 367 adequacy of the study personnels' qualifications and facilities, (II) accuracy of informed  
22  
23 368 consent procedures and patient eligibility, (III) adherence to the study protocol, (IV) protection  
24  
25 369 of rights and well-being of participants, (V) adherence to infection prevention and control  
26  
27 370 measures (VI) accuracy and completeness of study documents and other study-related  
28  
29 371 records, and (VII) maintenance of source documents.

30  
31  
32 37233  
34  
35 **373 Ethics and dissemination**

36  
37 374 The study protocol and informed consent/assent documents have been approved by regulatory  
38  
39 375 and ethical committees of the participating institutions [Medical Research Council in Zimbabwe  
40  
41 376 (MRCZ/A/2618), the National Health Research Ethics Committee in Tanzania (TMDA-  
42  
43 377 WEB0021/CTR/0004/03), the National Bioethics Committee for Health in Mozambique  
44  
45 378 (541/CNBS/21), and the ethical committees of London School of Hygiene & Tropical Medicine,  
46  
47 379 United Kingdom (22522-2), and the medical faculty of the Ludwig-Maximilians-Universität  
48  
49 380 München, Germany (20-0771)].

50  
51 381

52  
53 382 Adult ICs and HHCs are asked for written informed consent prior to their participation.  
54  
55 383 Underage HHCs are asked for assent in addition to obtaining the consent of their legal  
56  
57 384 guardians/parents; with ages for assent depending on local guidance. In case of illiteracy, the  
58  
59 385 participant is asked to give its consent by fingerprint while an adult impartial, literate witness

1  
2  
3 386 present during the entire consent procedure signs the consent on behalf. All participants have  
4  
5 387 the right to withdraw from the study at any time. Findings derived from ERASE-TB will be  
6  
7 388 presented at scientific conferences, and published in peer-reviewed international journals.  
8  
9  
10 389

### 11 390 **Current study status**

12  
13 391 The recruitment of ICs and HHCs is in progress in Zimbabwe, Mozambique and Tanzania  
14  
15 392 since March, August and September 2021, respectively. The follow-up of HHCs is anticipated  
16  
17 393 to be completed in March, August and September 2023 in Zimbabwe, Mozambique and  
18  
19 394 Tanzania, respectively; laboratory analyses are estimated to be performed by December 2024.  
20  
21  
22 395

### 23 24 396 **Author contributions**

25  
26 397 The study proposal and protocol were written by NH, KK with scientific input from CK, TM, CG,  
27  
28 398 JM. ETM, UP, DB, AM wrote the initial manuscript with scientific input on the database and  
29  
30 399 data management section from FR, TA. NH, KK critically reviewed the initial draft of the  
31  
32 400 manuscript. KH, GK, CJC, ENN, TA, provided critical feedback on the manuscript. All authors  
33  
34 401 have read and approved the final version of the manuscript.  
35  
36  
37 402

### 38 39 403 **Funding statement**

40  
41 404 ERASE-TB is part of the EDCTP2 programme supported by the European Union (grant  
42  
43 405 number RIA2018D-2508-ERASE-TB), the German Center for Infection Research (DZIF) grant  
44  
45 406 number: 02.710 and the Swedish Research Council (220-23602). CJC is funded by the  
46  
47 407 Wellcome Trust (203905/Z/16/Z). Cepheid, Inc., and SD Biosensor provided test kits and  
48  
49 408 analyzers at no cost to the Consortium.  
50  
51  
52 409

### 53 54 410 **Acknowledgments**

55  
56 411 We are grateful to the study personnel from the Biomedical Research and Training Institute  
57  
58 412 and the Zvitambo Research Institute, Zimbabwe, the Instituto Nacional de Saúde,  
59  
60 413 Mozambique, and the National Institute for Medical Research - Mbeya Medical Research



1  
2  
3 414 Centre, Tanzania for their exceptional efforts and contributions, which made this research  
4  
5 415 possible.

6  
7 416

8  
9 417 **Consortium authorship**

10  
11 418 The following are members of the ERASE-TB consortium: Anna Shepherd<sup>a</sup>, Hazel M Dockrell<sup>a</sup>,  
12  
13 419 Judith Bruchfeld<sup>b</sup>, Christopher Sundling<sup>b</sup>, Charles Sandy<sup>c</sup>, Mishelle Mugava<sup>c</sup>, Tsitsi  
14  
15 420 Bandason<sup>c</sup>, Martha Chipinduro<sup>c</sup>, Kuda Mutasa<sup>d</sup>, Sandra Rukobo<sup>d</sup>, Lwitiho Sudi<sup>e</sup>, Antelmo  
16  
17 421 Haule<sup>e</sup>, Emmanuel Sichone<sup>e</sup>, Paschal Qwaray<sup>e</sup>, Bariki Mtafya<sup>e</sup>, Harrieth Mwambola<sup>e</sup>, Lilian  
18  
19 422 Minja<sup>e</sup>, Issa Sabi<sup>e</sup>, Peter Edwin<sup>e</sup>, Dogo Ngalison<sup>e</sup>, Stella Luswema<sup>e</sup>, Willyhelmina Olomi<sup>e</sup>,  
20  
21 423 Doreen Pamba<sup>e</sup>, Simeon Mwanyonga<sup>e</sup>, Celina Nhamuave<sup>f</sup>, António Machiana<sup>f</sup>, Carla Madeira<sup>f</sup>,  
22  
23 424 Emelva Manhiça<sup>f</sup>, Nádia Siteo<sup>f</sup>, Jorge Ribeiro<sup>f</sup>, Christof Geldmacher<sup>g</sup>, Andrea Rachow<sup>g</sup>, Olena  
24  
25 425 Ivanova<sup>g</sup>, Laura Olbrich<sup>g</sup>, Elmar Saathoff<sup>g</sup>, Michael Hoelscher<sup>g</sup>.

26  
27 426

28  
29  
30 427 <sup>a</sup>Faculty of Infectious and Tropical Diseases, Department of Infection Biology, London School  
31  
32 428 of Hygiene & Tropical Medicine, London, UK

33  
34 429 <sup>b</sup>Karolinska Institute, Stockholm, Sweden

35  
36 430 <sup>c</sup>Biomedical Research and Training Institute, Harare, Zimbabwe

37  
38 431 <sup>d</sup>Zvitambo Research Institute, Harare, Zimbabwe

39  
40 432 <sup>e</sup>National Institute for Medical Research - Mbeya Medical Research Centre, Mbeya, Tanzania

41  
42 433 <sup>f</sup>Instituto Nacional de Saúde, Marracuene, Mozambique

43  
44 434 <sup>g</sup>Division of Infectious Diseases and Tropical Medicine, University Hospital, LMU Munich,  
45  
46 435 Munich, Germany

47  
48 436

49  
50 437 **Competing interests statement**

51  
52 438 None declared.

53  
54 439

55  
56 440 **Disclaimer**

57  
58 441 Not applicable.



## References

- 1 Global tuberculosis report 2021.  
<https://www.who.int/publications/i/item/9789240037021> (accessed 28 Oct 2021).
- 2 The end TB STRategy global strategy and targets for tuberculosis prevention, care and control after 2015 a. Published Online First: 2014.  
[https://www.who.int/tb/strategy/End\\_TB\\_Strategy.pdf](https://www.who.int/tb/strategy/End_TB_Strategy.pdf) (accessed 28 Oct 2021).
- 3 WHO. Global Tuberculosis Report. 2020.  
<https://www.who.int/publications/i/item/9789240013131> (accessed 31 Jul 2021).
- 4 Snider B, Patel B, McBean E. Asymptomatic Cases, the Hidden Challenge in Predicting COVID-19 Caseload Increases. *Infect Dis Reports 2021, Vol 13, Pages 340-347* 2021;**13**:340–7. doi:10.3390/IDR13020033
- 5 TB Disease - Symptoms, treatment & prevention - TBFacts. <https://tbfacts.org/tb-disease/> (accessed 28 Aug 2021).
- 6 Honeyborne I, McHugh TD, Phillips PPJ, *et al*. Molecular Bacterial Load Assay, a Culture-Free Biomarker for Rapid and Accurate Quantification of Sputum Mycobacterium tuberculosis Bacillary Load during Treatment. *J Clin Microbiol* 2011;**49**:3905. doi:10.1128/JCM.00547-11
- 7 UNAIDS. UNAIDS Global AIDS Update. 2021.  
[https://www.unaids.org/sites/default/files/media\\_asset/2021-global-aids-update\\_en.pdf](https://www.unaids.org/sites/default/files/media_asset/2021-global-aids-update_en.pdf) (accessed 28 Oct 2021).
- 8 ZIMBABWE POPULATION CENSUS 2012 WOMEN AND MEN PROFILE SUMMARY REPORT. Published Online First: 2016.  
<https://www.zimstat.co.zw/wp-content/uploads/publications/Social/Gender/Women-and-Men-Report-2012.pdf> (accessed 15 Oct 2021).
- 9 Tanzania Census 2012 - Dashboard. <http://dataforall.org/dashboard/tanzania/> (accessed 15 Oct 2021).
- 10 ZIMBABWE POPULATION-BASED HIV IMPACT ASSESSMENT ZIMPHIA 2020 KEY FINDINGS. [https://phia.icap.columbia.edu/wp-content/uploads/2020/11/ZIMPHIA-2020-Summary-Sheet\\_Web.pdf](https://phia.icap.columbia.edu/wp-content/uploads/2020/11/ZIMPHIA-2020-Summary-Sheet_Web.pdf) (accessed 3 Sep 2021).
- 11 Xadrique H, Maunze A, Dade M, *et al*. IV RECENSEAMENTO GERAL DA POPULAÇÃO E HABITAÇÃO. 2017. <http://www.ine.gov.mz/iv-rgph-2017/mocambique/censo-2017-brochura-dos-resultados-definitivos-do-iv-rgph-nacional.pdf> (accessed 31 Jul 2021).
- 12 Population of Cities in Zimbabwe (2021). <https://worldpopulationreview.com/countries/cities/zimbabwe> (accessed 3 Aug 2021).
- 13 World atlas. <https://knoema.com/atlas/United-Republic-of-Tanzania>. (accessed 26 Jul 2021).
- 14 Prevalence of HIV, total (% of population ages 15-49) | Data. <https://data.worldbank.org/indicator/SH.DYN.AIDS.ZS?locations=ZW> (accessed 3 Aug 2021).
- 15 Incidence of tuberculosis (per 100,000 people) - Zimbabwe | Data. <https://data.worldbank.org/indicator/SH.TBS.INCD?locations> (accessed 3 Aug 2021).
- 16 Fox GJ, Nhung N V., Sy DN, *et al*. Household-Contact Investigation for Detection of Tuberculosis in Vietnam. *N Engl J Med* 2018;**378**:221–9. doi:10.1056/NEJMOA1700209
- 17 Qin ZZ, Ahmed S, Sarker MS, *et al*. Tuberculosis detection from chest x-rays for triaging in a high tuberculosis-burden setting: an evaluation of five artificial intelligence algorithms. *Lancet Digit Heal* 2021;**3**:e543–54. doi:10.1016/S2589-7500(21)00116-3
- 18 MacPherson P, Webb EL, Kamchedzera W, *et al*. Computer-aided X-ray screening for tuberculosis and HIV testing among adults with cough in Malawi (the PROSPECT study): A randomised trial and cost-effectiveness analysis. *PLoS Med* 2021;**18**:1–17. doi:10.1371/journal.pmed.1003752
- 19 Dorman S, Schumacher S, Alland D, *et al*. Xpert MTB/RIF Ultra for detection of Mycobacterium tuberculosis and rifampicin resistance: a prospective multicentre diagnostic accuracy study. *Lancet Infect Dis* 2018;**18**:76–84. doi:10.1016/S1473-

- 1  
2  
3 498 3099(17)30691-6  
4 499 20 WHO Meeting Report of a Technical Expert Consultation: Non-inferiority analysis of  
5 500 Xpert MTB/RIF Ultra compared to Xpert MTB/RIF. Published Online First:  
6 501 2017.<http://apps.who.int/bookorders>. (accessed 19 Oct 2021).  
7 502 21 World Health Organization. WHO consolidated guidelines on tuberculosis: Module 2:  
8 503 Screening. 2021.<https://www.who.int/publications/i/item/9789240022676> (accessed 9  
9 504 Dec 2021).  
10 505 22 Hamasur B, Bruchfeld J, van Helden P, *et al*. A sensitive urinary lipoarabinomannan  
11 506 test for tuberculosis. *PLoS One* 2015;**10**. doi:10.1371/JOURNAL.PONE.0123457  
12 507 23 Portevin D, Moukambi F, Clowes P, *et al*. Assessment of the novel T-cell activation  
13 508 marker-tuberculosis assay for diagnosis of active tuberculosis in children: a  
14 509 prospective proof-of-concept study. *Lancet Infect Dis* 2014;**14**:931–8.  
15 510 doi:10.1016/S1473-3099(14)70884-9  
16 511 24 Schuetz A, Haule A, Reither K, *et al*. Monitoring CD27 expression to evaluate  
17 512 Mycobacterium tuberculosis activity in HIV-1 infected individuals in vivo. *PLoS One*  
18 513 2011;**6**. doi:10.1371/JOURNAL.PONE.0027284  
19 514 25 Ahmed MIM, Ntinginya NE, Kibiki G, *et al*. Phenotypic Changes on Mycobacterium  
20 515 Tuberculosis-Specific CD4 T Cells as Surrogate Markers for Tuberculosis Treatment  
21 516 Efficacy. *Front Immunol* 2018;**9**:2247. doi:10.3389/FIMMU.2018.02247/BIBTEX  
22 517 26 Gupta RK, Turner CT, Venturini C, *et al*. Concise whole blood transcriptional  
23 518 signatures for incipient tuberculosis: a systematic review and patient-level pooled  
24 519 meta-analysis. *Lancet Respir Med* 2020;**8**:395–406.  
25 520 doi:<http://dx.doi.org/10.1016/S2213-2600%2819%2930282-6>  
26 521 27 Scriba TJ, Fiore-Gartland A, Penn-Nicholson A, *et al*. Biomarker-guided tuberculosis  
27 522 preventive therapy (CORTIS): a randomised controlled trial. *Lancet Infect Dis*  
28 523 2021;**21**:354–65. doi:10.1016/S1473-3099(20)30914-2/ATTACHMENT/EB270186-  
29 524 669A-4F82-8A80-FB38FA1FB796/MMC1.PDF  
30 525 28 Warsinske H, Rao A, Moreira F, *et al*. Assessment of Validity of a Blood-Based 3-  
31 526 Gene Signature Score for Progression and Diagnosis of Tuberculosis, Disease  
32 527 Severity, and Treatment Response. *JAMA Netw open* 2018;**1**:e183779.  
33 528 doi:10.1001/JAMANETWORKOPEN.2018.3779  
34 529 29 Sweeney TE, Braviak L, Tato CM, *et al*. Genome-wide expression for diagnosis of  
35 530 pulmonary tuberculosis: a multicohort analysis. *Lancet Respir Med* 2016;**4**:213–24.  
36 531 doi:10.1016/S2213-2600(16)00048-5  
37 532 30 Mendelson F, Griesel R, Tiffin N, *et al*. C-reactive protein and procalcitonin to  
38 533 discriminate between tuberculosis, Pneumocystis jirovecii pneumonia, and bacterial  
39 534 pneumonia in HIV-infected inpatients meeting WHO criteria for seriously ill: a  
40 535 prospective cohort study. *BMC Infect Dis* 2018;**18**. doi:10.1186/S12879-018-3303-6  
41 536 31 Huang C, Lee L, Ho C, *et al*. High serum levels of procalcitonin and soluble TREM-1  
42 537 correlated with poor prognosis in pulmonary tuberculosis. *J Infect* 2014;**68**:440–7.  
43 538 doi:10.1016/J.JINF.2013.12.012  
44 539 32 Feng J, Su W, Pan S, *et al*. Role of TREM-1 in pulmonary tuberculosis patients-  
45 540 analysis of serum soluble TREM-1 levels. *Sci Rep* 2018;**8**. doi:10.1038/S41598-018-  
46 541 26478-2  
47 542 33 Kumar NP, Velayutham B, Nair D, *et al*. Angiopoietins as biomarkers of disease  
48 543 severity and bacterial burden in pulmonary tuberculosis. *Int J Tuberc Lung Dis*  
49 544 2017;**21**:93. doi:10.5588/IJTLD.16.0565  
50 545 34 Kathamuthu G, Moideen K, Baskaran D, *et al*. Tuberculous lymphadenitis is  
51 546 associated with altered levels of circulating angiogenic factors. *Int J Tuberc Lung Dis*  
52 547 2018;**22**:557–66. doi:10.5588/IJTLD.17.0609  
53 548 35 Sivo A, McKinnon L, Yende-Zuma N, *et al*. Plasma Cytokine Predictors of  
54 549 Tuberculosis Recurrence in Antiretroviral-Treated Human Immunodeficiency Virus-  
55 550 infected Individuals from Durban, South Africa. *Clin Infect Dis* 2017;**65**:819–26.  
56 551 doi:10.1093/CID/CIX357  
57 552 36 La Manna M, Orlando V, Li Donni P, *et al*. Identification of plasma biomarkers for  
58 553 discrimination between tuberculosis infection/disease and pulmonary non tuberculosis

- 1  
2  
3 554 disease. *PLoS One* 2018;**13**. doi:10.1371/JOURNAL.PONE.0192664  
4 555 37 Sivo A, McKinnon L, Yende-Zuma N, *et al*. Plasma Cytokine Predictors of  
5 556 Tuberculosis Recurrence in Antiretroviral-Treated Human Immunodeficiency Virus-  
6 557 infected Individuals from Durban, South Africa. *Clin Infect Dis* 2017;**65**:819–26.  
7 558 doi:10.1093/CID/CIX357  
8 559 38 Chegou NN, Sutherland JS, Malherbe S, *et al*. Diagnostic performance of a seven-  
9 560 marker serum protein biosignature for the diagnosis of active TB disease in African  
10 561 primary healthcare clinic attendees with signs and symptoms suggestive of TB. *Thorax*  
11 562 2016;**71**:785–94. doi:10.1136/thoraxjnl-2015-207999  
12 563 39 Collins GS, Reitsma JB, Altman DG, *et al*. Transparent reporting of a multivariable  
13 564 prediction model for individual prognosis or diagnosis (TRIPOD): The TRIPOD  
14 565 Statement. *BMC Med* 2015;**13**:1–10. doi:10.1186/S12916-014-0241-Z/TABLES/1  
15 566 40 Trevethan R. Sensitivity, Specificity, and Predictive Values: Foundations, Pliabilities,  
16 567 and Pitfalls in Research and Practice. *Front public Heal* 2017;**5**.  
17 568 doi:10.3389/FPUBH.2017.00307  
18 569 41 Agency ZS. QUALITY CONTROL MANUAL Provincial Report Harare Central Census  
19 570 Office. [https://www.zimstat.co.zw/wp-](https://www.zimstat.co.zw/wp-content/uploads/publications/Population/population/Harare.pdf)  
20 571 [content/uploads/publications/Population/population/Harare.pdf](https://www.zimstat.co.zw/wp-content/uploads/publications/Population/population/Harare.pdf) (accessed 3 Aug  
21 572 2021).  
22 573 42 Mozambique Population 2021 (Demographics, Maps, Graphs).  
23 574 <https://worldpopulationreview.com/countries/mozambique-population> (accessed 27 Jul  
24 575 2021).  
25 576 43 ZIMBABWE NATIONAL HIV/AIDS AND TUBERCULOSIS CONTROL  
26 577 PROGRAMMES. Republic of Zimbabwe NATIONAL HIV/AIDS AND TUBERCULOSIS  
27 578 CONTROL PROGRAMMES. <https://www.who.int/hiv/pub/guidelines/zimbabwe.pdf>  
28 579 (accessed 1 Sep 2021).  
29 580  
30 581  
31  
32  
33  
34  
35  
36  
37  
38  
39  
40  
41  
42  
43  
44  
45  
46  
47  
48  
49  
50  
51  
52  
53  
54  
55  
56  
57  
58  
59  
60

1  
2  
3 582 **Figure legend**

4  
5 583 **Figure 1.** The ERASE-TB consortium

6  
7 584 Abbreviations: ERASE-TB=Early Risk Assessment in TB contactS by new diagnostic tEsts

8  
9 585

10  
11 586 **Figure 2.** Location and characteristics of ERASE-TB study sites

12  
13 587 Notes: The location of each study site is indicated by a red asterix. Source data used within  
14  
15 588 this figure are taken from the references [7,8,41–43,9–15].

16  
17 589 Abbreviations: ERASE=Early Risk Assessment in TB contactS by new diagnostic tEsts;  
18  
19 590 TB=tuberculosis; HIV=human immunodeficiency virus

20  
21  
22 591

23  
24 592 **Figure 3.** Eligibility criteria and schedules of events for index cases and household contacts

25  
26 593 Notes: **A**=depending on the time point of study enrollment and consequently on the duration  
27  
28 594 available for follow-up, i.e. 18 or 24 months, the follow-up visit at 24 months  $\pm$ 30 days may be  
29  
30 595 conditional; **B**=the follow-up visit by phone may be conducted after the last scheduled follow-  
31  
32 596 up visit at 18 months  $\pm$ 30 days or 24 months  $\pm$ 30 days to assess whether symptoms suggestive  
33  
34 597 of TB have occurred, TB diagnosis has been made or anti-TB treatment has been initiated;  
35  
36 598 **C**=unwell visits by phone or on-site may be conducted between scheduled follow-up visits if a  
37  
38 599 participant presents at a recruitment healthcare facility with signs and symptoms suggestive of  
39  
40 600 TB; **D**=coached spontaneous or induced sputum collection for storage at scheduled follow-up  
41  
42 601 visit at 18 months  $\pm$ 30 days or 24 months  $\pm$ 30 days, and for repetition of HIV testing if tested  
43  
44 602 negative at baseline; **E**=coached spontaneous or induced sputum collection upon the decision  
45  
46 603 of the investigating team for testing by Xpert MTB/RIF Ultra if participant presents with signs  
47  
48 604 and symptoms suggestive of TB; **F**=coached spontaneous or induced sputum collection in  
49  
50 605 case of Xpert MTB/RIF Ultra positivity or strong clinical suspicion of TB for repetition of the  
51  
52 606 Xpert MTB/RIF Ultra; **G**=in case of HIV positivity to be followed by the assessment of CD4  
53  
54 607 counts; **H**=CXR to be conducted at an unscheduled on-site unwell visit upon the decision of  
55  
56 608 the investigating team depending on the nature of symptoms reported, and the time elapsed  
57  
58 609 since the last CXR including its findings; **I**=not to be conducted among pregnant women;

1  
2  
3 610 **J**=stored venous blood includes 6mL EDTA blood for whole blood and plasma, 4mL serum  
4  
5 611 and 2.5mL PAXgene blood, all samples will be deep frozen for retrospective testing using new  
6  
7 612 diagnostics as described in text; **K**=in case the evaluation of symptoms of a participant unable  
8  
9 613 to present at a recruitment healthcare facility is required an unscheduled on-site or home visit  
10  
11 614 will be arranged by phone, the resolution of symptoms can alternatively be addressed by  
12  
13 615 phone; **L**=collection of PBMC at baseline and follow-up visit at 6 months  $\pm$ 30 days is optional,  
14  
15 616 thus will not be performed at each participating site and for each participant; **M**=in case the  
16  
17 617 evaluation of symptoms of a participant unable to present at a recruitment healthcare facility  
18  
19 618 is required or doubtful if required an unscheduled unwell visit by phone will be arranged, the  
20  
21 619 resolution of symptoms can alternatively be addressed by phone; **N**=spirometry and/or  
22  
23 620 diabetes (HbA1c) will be performed at scheduled follow-up visits at 6 months  $\pm$ 30 days, 12  
24  
25 621 months  $\pm$ 30 days and 18 or 24 months  $\pm$ 30 days if required or not performed at baseline,  
26  
27 622 anaemia (Hb) will be performed at baseline and scheduled follow-up visits at 6 months  $\pm$ 30  
28  
29 623 days, 12 months  $\pm$ 30 days and 18 or 24 months  $\pm$ 30 days if possible; **O**=blood pressure  
30  
31 624 measurement will be performed at baseline and scheduled follow-up visits at 6 months  $\pm$ 30  
32  
33 625 days, 12 months  $\pm$ 30 days and 18 or 24 months  $\pm$ 30 days; **P**=WGS to be performed once *Mtb*  
34  
35 626 infection is confirmed and an isolate could be recovered.

36  
37  
38  
39 627 Abbreviations: TB=tuberculosis; WHO=World Health Organization; HIV=human  
40  
41 628 immunodeficiency virus; WGS=whole genome sequencing; MBLA=molecular bacterial load  
42  
43 629 assay; CXR=chest radiograph; IGRA=interferon gamma release assay; PBMC=peripheral  
44  
45 630 blood mononuclear cell; TAM-TB=T- cell activation marker tuberculosis; MTB=*Mycobacterium*  
46  
47 631 *tuberculosis*; RIF=rifampicin, Hb=haemoglobin; HbA1c=glycated hemoglobin;  
48  
49 632 LAM=lioparabinomannan; CD4=cluster of differentiation 4

50  
51 633

#### 52 634 **Figure 4.** Study design

53  
54  
55 635 Abbreviations: HHC=household contact; TB=tuberculosis; IC=index case; WHO=World  
56  
57 636 Health Organization; CXR= chest radiograph; SS=symptom score; MTB=*Mycobacterium*  
58  
59 637 *tuberculosis*; RIF=rifampicin; pos=positive; CT=computer tomography; FU=follow-up





Figure 1. The ERASE-TB consortium



**Figure 2.** Location and characteristics of ERASE-TB study sites



**INDEX CASE**

**HOUSEHOLD CONTACT**

**INCLUSION CRITERIA**

- Aged ≥18 years
- Living with at least another person aged ≥10 years in the same household with a firm unchanged address for 6 months
- Pulmonary TB diagnosis within 4 weeks prior to enrolment
- Spontaneous sputum production
- Positive sputum smear, i.e. >+2 positivity by Ziehl-Neelsen stain or Auramine-O stain OR ≥+1 positivity on WHO symptom scale OR ≥medium positivity by GeneXpert (if no microscopy performed)
- <7 daily doses of anti-TB treatment since diagnosis
- Voluntary written informed consent obtained

**EXCLUSION CRITERIA**

- Treatment for TB within the past 30 days OR on current TB treatment OR on current preventive TB therapy (if HIV negative) at the time of enrolment



**INCLUSION CRITERIA**

- Aged ≥10 years
- Substantial exposure, i.e. spending ≥3 nights/week over the past 4 weeks in the same household as the index case,
- Voluntary written informed consent or parent/guardian consent & assent in case of minors obtained

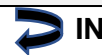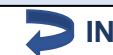

**EVENTS AT BASELINE/SCREENING VISIT**

- Administration of socio-demographic questionnaire
  - Assessment of vital signs, medical history
  - Digital CXR (if available)<sup>I</sup>
- Specimen investigations**
- Sputum: culture, storage, WGS, MBLA

**EVENTS AT BASELINE/ ±14days of SCREENING VISIT**

- Administration of socio-demographic questionnaire
  - Assessment vital signs, medical history
  - Screening for diabetes (HbA1c)<sup>N</sup>, high blood pressure<sup>O</sup>, anaemia (Hb)<sup>N</sup>, WHO TB symptoms
  - Digital CXR<sup>I</sup>, spirometry<sup>N</sup>
- Specimen investigations**
- Sputum: Xpert MTB/RIF Ultra<sup>E</sup>, culture<sup>F</sup>, storage, WGS<sup>P</sup>
  - Blood: HIV/CD4 counts<sup>G</sup>, Cepheid host response, TAM-TB, IGRA SD Biosensor, PBMC<sup>L</sup>, storage<sup>J</sup>
  - Urine: dipstick/LAM, storage

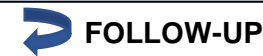

**EVENTS AT UNSCHEDULED UNWELL VISIT(S)**  
(phone/on-site)<sup>C,K,M</sup>

- Assessment of vital signs, medical history
  - Screening for high blood pressure, WHO TB symptoms,
  - Digital CRX<sup>H,I</sup>
- Specimen investigations**
- Sputum: Xpert MTB/RIF Ultra, culture, storage, WGS<sup>P</sup>
  - Blood: Cepheid host response, TAM-TB, storage<sup>J</sup>
  - Urine: dipstick/LAM, storage

**EVENTS AT UN-SCHEDULED FOLLOW-UP VISIT(S)<sup>B</sup>** (phone)

- Assessment of medical history
  - Screening for WHO TB symptoms
- Specimen investigations**
- None

**EVENTS AT 6months ±30days/ 12months ±30days/ 18months ±30days/ 24months ±30days<sup>A</sup> FOLLOW-UP VISITS**

- Assessment of vital signs, medical history
  - Screening for high blood pressure, WHO TB symptoms
  - Digital CXR<sup>I</sup>, spirometry<sup>N</sup>
- Specimen investigations**
- Sputum: Xpert MTB/RIF Ultra<sup>E</sup>, culture<sup>F</sup>, storage<sup>D</sup>, WGS<sup>P</sup>
  - Blood: Cepheid host response, TAM-TB, PBMC<sup>L</sup>, storage
  - Urine: dipstick/LAM, storage<sup>J</sup>



Optional

Optional

1  
2  
3  
4  
5  
6  
7  
8  
9  
10  
11  
12  
13  
14  
15  
16  
17  
18  
19  
20  
21  
22  
23  
24  
25  
26  
27  
28  
29  
30  
31  
32  
33  
34  
35  
36  
37  
38  
39  
40  
41  
42  
43  
44  
45  
46

**Figure 3.** Eligibility criteria and schedules of events for index cases and household contacts

For peer review only



**Figure 4.** Study design.

| Section & Topic          | No  | Item                                                                                                                                                   | Reported on page # |
|--------------------------|-----|--------------------------------------------------------------------------------------------------------------------------------------------------------|--------------------|
| <b>TITLE OR ABSTRACT</b> |     |                                                                                                                                                        |                    |
|                          | 1   | Identification as a study of diagnostic accuracy using at least one measure of accuracy (such as sensitivity, specificity, predictive values, or AUC)  | 2                  |
| <b>ABSTRACT</b>          |     |                                                                                                                                                        |                    |
|                          | 2   | Structured summary of study design, methods, results, and conclusions (for specific guidance, see STARD for Abstracts)                                 | 2-3                |
| <b>INTRODUCTION</b>      |     |                                                                                                                                                        |                    |
|                          | 3   | Scientific and clinical background, including the intended use and clinical role of the index test                                                     | 5-6                |
|                          | 4   | Study objectives and hypotheses                                                                                                                        | 6                  |
| <b>METHODS</b>           |     |                                                                                                                                                        |                    |
| <i>Study design</i>      | 5   | Whether data collection was planned before the index test and reference standard were performed (prospective study) or after (retrospective study)     | 6-7                |
| <i>Participants</i>      | 6   | Eligibility criteria                                                                                                                                   | 7 (Figure 3)       |
|                          | 7   | On what basis potentially eligible participants were identified (such as symptoms, results from previous tests, inclusion in registry)                 | 7 (Figure 3)       |
|                          | 8   | Where and when potentially eligible participants were identified (setting, location and dates)                                                         | 7                  |
|                          | 9   | Whether participants formed a consecutive, random or convenience series                                                                                | 7, 11              |
| <i>Test methods</i>      | 10a | Index test, in sufficient detail to allow replication                                                                                                  | 8-10, 11-13        |
|                          | 10b | Reference standard, in sufficient detail to allow replication                                                                                          | 8-10, 11-13        |
|                          | 11  | Rationale for choosing the reference standard (if alternatives exist)                                                                                  | 8-10, 11-13        |
|                          | 12a | Definition of and rationale for test positivity cut-offs or result categories of the index test, distinguishing pre-specified from exploratory         | 13-14              |
|                          | 12b | Definition of and rationale for test positivity cut-offs or result categories of the reference standard, distinguishing pre-specified from exploratory | 13-14              |
|                          | 13a | Whether clinical information and reference standard results were available to the performers/readers of the index test                                 | 13-14              |
|                          | 13b | Whether clinical information and index test results were available to the assessors of the reference standard                                          | 13-14              |
| <i>Analysis</i>          | 14  | Methods for estimating or comparing measures of diagnostic accuracy                                                                                    | 13-14              |
|                          | 15  | How indeterminate index test or reference standard results were handled                                                                                | 13-14              |
|                          | 16  | How missing data on the index test and reference standard were handled                                                                                 | 14                 |
|                          | 17  | Any analyses of variability in diagnostic accuracy, distinguishing pre-specified from exploratory                                                      | 13-14              |
|                          | 18  | Intended sample size and how it was determined                                                                                                         | 11                 |
| <b>RESULTS</b>           |     |                                                                                                                                                        |                    |
| <i>Participants</i>      | 19  | Flow of participants, using a diagram                                                                                                                  | 8-10 (Figure 3)    |
|                          | 20  | Baseline demographic and clinical characteristics of participants                                                                                      | 8-10 (Figure 3)    |
|                          | 21a | Distribution of severity of disease in those with the target condition                                                                                 |                    |
|                          | 21b | Distribution of alternative diagnoses in those without the target condition                                                                            |                    |
|                          | 22  | Time interval and any clinical interventions between index test and reference standard                                                                 |                    |
| <i>Test results</i>      | 23  | Cross-tabulation of the index test results (or their distribution) by the results of the reference standard                                            |                    |
|                          | 24  | Estimates of diagnostic accuracy and their precision (such as 95% confidence intervals)                                                                | 13-14              |
|                          | 25  | Any adverse events from performing the index test or the reference standard                                                                            |                    |
| <b>DISCUSSION</b>        |     |                                                                                                                                                        |                    |
|                          | 26  | Study limitations, including sources of potential bias, statistical uncertainty, and generalisability                                                  | 3                  |
|                          | 27  | Implications for practice, including the intended use and clinical role of the index test                                                              | 5-6                |
| <b>OTHER INFORMATION</b> |     |                                                                                                                                                        |                    |
|                          | 28  | Registration number and name of registry                                                                                                               | 2                  |
|                          | 29  | Where the full study protocol can be accessed                                                                                                          |                    |
|                          | 30  | Sources of funding and other support; role of funders                                                                                                  | 16                 |

# STARD 2015

---

## AIM

STARD stands for “Standards for Reporting Diagnostic accuracy studies”. This list of items was developed to contribute to the completeness and transparency of reporting of diagnostic accuracy studies. Authors can use the list to write informative study reports. Editors and peer-reviewers can use it to evaluate whether the information has been included in manuscripts submitted for publication.

---

## EXPLANATION

A **diagnostic accuracy study** evaluates the ability of one or more medical tests to correctly classify study participants as having a **target condition**. This can be a disease, a disease stage, response or benefit from therapy, or an event or condition in the future. A medical test can be an imaging procedure, a laboratory test, elements from history and physical examination, a combination of these, or any other method for collecting information about the current health status of a patient.

The test whose accuracy is evaluated is called **index test**. A study can evaluate the accuracy of one or more index tests. Evaluating the ability of a medical test to correctly classify patients is typically done by comparing the distribution of the index test results with those of the **reference standard**. The reference standard is the best available method for establishing the presence or absence of the target condition. An accuracy study can rely on one or more reference standards.

If test results are categorized as either positive or negative, the cross-tabulation of the index test results against those of the reference standard can be used to estimate the **sensitivity** of the index test (the proportion of participants *with* the target condition who have a positive index test), and its **specificity** (the proportion *without* the target condition who have a negative index test). From this cross-tabulation (sometimes referred to as the contingency or “2x2” table), several other accuracy statistics can be estimated, such as the positive and negative **predictive values** of the test. Confidence intervals around estimates of accuracy can then be calculated to quantify the statistical **precision** of the measurements.

If the index test results can take more than two values, categorization of test results as positive or negative requires a **test positivity cut-off**. When multiple such cut-offs can be defined, authors can report a receiver operating characteristic (ROC) curve which graphically represents the combination of sensitivity and specificity for each possible test positivity cut-off. The **area under the ROC curve** informs in a single numerical value about the overall diagnostic accuracy of the index test.

The **intended use** of a medical test can be diagnosis, screening, staging, monitoring, surveillance, prediction or prognosis. The **clinical role** of a test explains its position relative to existing tests in the clinical pathway. A replacement test, for example, replaces an existing test. A triage test is used before an existing test; an add-on test is used after an existing test.

Besides diagnostic accuracy, several other outcomes and statistics may be relevant in the evaluation of medical tests. Medical tests can also be used to classify patients for purposes other than diagnosis, such as staging or prognosis. The STARD list was not explicitly developed for these other outcomes, statistics, and study types, although most STARD items would still apply.

---

## DEVELOPMENT

This STARD list was released in 2015. The 30 items were identified by an international expert group of methodologists, researchers, and editors. The guiding principle in the development of STARD was to select items that, when reported, would help readers to judge the potential for bias in the study, to appraise the applicability of the study findings and the validity of conclusions and recommendations. The list represents an update of the first version, which was published in 2003.

More information can be found on <http://www.equator-network.org/reporting-guidelines/stard>.



Supplement: bmjopen-2022-060985.draft_revisions.pdf [file bmjopen-2022-060985.draft_revisions.pdf]
